## 1 **The Great Deceiver: miR-2392's Hidden Role in Driving SARS-CoV-2 Infection**

2 J. Tyson McDonald<sup>1,2</sup>, Francisco Javier Enguita<sup>1,3</sup>, Deanne Taylor<sup>1,4,5</sup>, Richard A. Bowen<sup>6</sup>,  
3 Robert J. Griffin<sup>1,7</sup>, Waldemar Priebe<sup>1,8</sup>, Mark R. Emmett<sup>1,9</sup>, Marisa McGrath<sup>10</sup>, Mohammad M.  
4 Sajadi<sup>10</sup>, Anthony D. Harris<sup>11</sup>, Jean Clement<sup>10</sup>, Joseph M. Dybas<sup>1,4</sup>, Nukhet Aykin-Burns<sup>12</sup>,  
5 Joseph W. Guarnieri<sup>1,13</sup>, Larry N. Singh<sup>1,13</sup>, Peter Grabham<sup>1,14</sup>, Stephen B. Baylin<sup>1,15</sup>, Aliza  
6 Yousey<sup>1,16</sup>, Andrea N. Pearson<sup>16</sup>, Peter M. Corry<sup>1,7</sup>, Amanda Saravia-Butler<sup>1,17,18</sup>, Thomas R.  
7 Aunins<sup>19</sup>, Prashant Nagpal<sup>19,20,21,22</sup>, Cem Meydan<sup>23,24</sup>, Jonathan Foox<sup>22,24</sup>, Christopher  
8 Mozsary<sup>22,24</sup>, Bianca Cerqueira<sup>1,25,26</sup>, Viktorija Zaksas<sup>1,27</sup>, Urminder Singh<sup>1,28</sup>, Eve Syrkin  
9 Wurtele<sup>1,28</sup>, Sylvain V. Costes<sup>18</sup>, Diego Galeano<sup>1,29,30</sup>, Alberto Paccanaro<sup>1,29,31</sup>, Suzanne L.  
10 Meinig<sup>32</sup>, Robert S. Hagan<sup>32,33</sup>, Natalie M Bowman<sup>34</sup>, UNC COVID-19 Pathobiology  
11 Consortium<sup>35,36+</sup>, Matthew C. Wolfgang<sup>32,36</sup>, Selin Altinok<sup>37</sup>, Nicolae Sapoval<sup>1,38</sup>, Todd J.  
12 Treangen<sup>1,38</sup>, Matthew Frieman<sup>1,10</sup>, Charles Vanderburg<sup>39</sup>, Douglas C. Wallace<sup>1,13</sup>, Jonathan  
13 Schisler<sup>1,37</sup>, Christopher E. Mason<sup>1,23,24,40,41</sup>, Anushree Chatterjee<sup>1,20,21</sup>, Robert Meller<sup>1,16</sup>, Afshin  
14 Beheshti<sup>1,39,42,43,44\*</sup>

15  
16 <sup>1</sup>COVID-19 International Research Team

17 <sup>2</sup>Department of Radiation Medicine, Georgetown University School of Medicine, Washington  
18 D.C. 20007, USA

19 <sup>3</sup>Instituto de Medicina Molecular João Lobo Antunes, Faculdade de Medicina, Universidade de  
20 Lisboa, Av. Prof. Egas Moniz, 1649-028 Lisbon, Portugal

21 <sup>4</sup>Department of Biomedical and Health Informatics, The Children's Hospital of Philadelphia,  
22 Philadelphia, PA 19104 USA

23 <sup>5</sup>Department of Pediatrics, Perelman School of Medicine, University of Pennsylvania,  
24 Philadelphia, PA 19104 USA

25 <sup>6</sup>Department of Biomedical Sciences, Colorado State University, Fort Collins, CO, USA.

26 <sup>7</sup>Radiation Biology Division, Dept of Radiation Oncology, University of Arkansas for Medical  
27 Sciences, Little Rock, AK, 72211 USA

28 <sup>8</sup>Department of Experimental Therapeutics, University of Texas MD Anderson Cancer Center,  
29 Houston, TX, 77030, USA

30 <sup>9</sup>Department of Biochemistry and Molecular Biology, University of Texas Medical Branch,  
31 Galveston, TX 77555, USA

32 <sup>10</sup>Institute of Human Virology, University of Maryland School of Medicine, Baltimore, MD,  
33 21201, USA

34 <sup>11</sup>Department of Epidemiology and Public Health, University of Maryland School of Medicine,  
35 Baltimore, MD, 21201, USA

36 <sup>12</sup>Division of Radiation Health, Department of Pharmaceutical Sciences, University of Arkansas  
37 for Medical Sciences, Little Rock, AK, 72211 USA

38 <sup>13</sup>Center for Mitochondrial and Epigenomic Medicine, Children's Hospital of Philadelphia,  
39 Philadelphia, PA 19104, USA

40 <sup>14</sup>Center for Radiological Research, Columbia University, New York, NY 10032, USA

41 <sup>15</sup>Department of Oncology, Sidney Kimmel Comprehensive Cancer Center, Johns Hopkins  
42 School of Medicine, Baltimore, MD 21287, USA

- 43 <sup>16</sup>Department of Neurobiology and Pharmacology, Morehouse School of Medicine, Atlanta, GA  
44 30310, USA
- 45 <sup>17</sup>Logyx, LLC, Mountain View, CA 94043, USA
- 46 <sup>18</sup>Space Biosciences Division, NASA Ames Research Center, Moffett Field, CA 94035, USA
- 47 <sup>19</sup>Department of Chemical and Biological Engineering, University of Colorado Boulder,  
48 Boulder, CO, 80303, USA
- 49 <sup>20</sup>Sachi Bioworks Inc, Boulder, CO, 80301, USA
- 50 <sup>21</sup>Antimicrobial Regeneration Consortium, Boulder, CO, 80301, USA
- 51 <sup>22</sup>Quantum Biology Inc, Boulder, CO, 80301, USA
- 52 <sup>23</sup>Department of Physiology, Biophysics and Systems Biology, Weill Cornell Medicine, NY,  
53 10065, USA
- 54 <sup>24</sup>The HRH Prince Alwaleed Bin Talal Bin Abdulaziz Alsaud Institute for Computational  
55 Biomedicine, Weill Cornell Medicine, NY, 10065, USA
- 56 <sup>25</sup>KBR Space & Science, San Antonio, TX, 78235, USA
- 57 <sup>26</sup>Aeromedical Neurology & Neuroimaging Research Group, United States Air Force School of  
58 Aerospace Medicine, Lackland AFB, TX, 78236, USA
- 59 <sup>27</sup>Center for Translational Data Science, University of Chicago, Chicago, IL, 60615, USA
- 60 <sup>28</sup>Bioinformatics and Computational Biology Program, Center for Metabolic Biology,  
61 Department of Genetics, Development and Cell Biology, Iowa State University, Ames, IA  
62 50011, USA
- 63 <sup>29</sup>School of Applied Mathematics, Fundação Getulio Vargas, Rio de Janeiro, Brazil
- 64 <sup>30</sup>Faculty of Engineering, National University of Asuncion, Central, Paraguay
- 65 <sup>31</sup>Department of Computer Science, Centre for Systems and Synthetic Biology, Royal Holloway,  
66 University of London, Egham Hill, Egham, UK
- 67 <sup>32</sup>Marsico Lung Institute, University of North Carolina at Chapel Hill, Chapel Hill, NC, 27599,  
68 USA
- 69 <sup>33</sup>Division of Pulmonary Diseases and Critical Care Medicine, Department of Medicine,  
70 University of North Carolina, Chapel Hill, NC 27599, USA
- 71 <sup>34</sup>Division of Infectious Disease, School of Medicine, University of North Carolina, Chapel Hill,  
72 NC, 27599, USA
- 73 <sup>35</sup>Department of Oral and Craniofacial Health Sciences, UNC Adams School of Dentistry,  
74 University of North Carolina School of Medicine, Chapel Hill, NC, 27599, USA
- 75 <sup>36</sup>Department of Microbiology & Immunology, University of North Carolina School of  
76 Medicine, Chapel Hill, NC, 27599, USA
- 77 <sup>37</sup>McAllister Heart Institute, Department of Pharmacology, and Department of Pathology and  
78 Lab Medicine, The University of North Carolina at Chapel Hill, NC 27599, USA
- 79 <sup>38</sup>Department of Computer Science, Rice University, Houston, TX 77005, USA
- 80 <sup>39</sup>Stanley Center for Psychiatric Research, Broad Institute of MIT and Harvard, Cambridge, MA,  
81 02142, USA
- 82 <sup>40</sup>New York Genome Center, NY, USA
- 83 <sup>41</sup>The Feil Family Brain and Mind Research Institute, Weill Cornell Medicine, NY, 10065, USA
- 84 <sup>42</sup>KBR, Space Biosciences Division, NASA Ames Research Center, Moffett Field, CA, 94035,  
85 USA
- 86 <sup>43</sup>Senior author

87 <sup>44</sup>Lead Contact

88 +The full list of authors associated with the UNC COVID-19 Pathobiology Consortium is  
89 available in the supplemental information.

90 \*Correspondence: [afshin.beheshti@ncsu.edu](mailto:afshin.beheshti@ncsu.edu)

91

## 92 **Summary (150 words)**

93 MicroRNAs (miRNAs) are small non-coding RNAs involved in post-transcriptional gene  
94 regulation that have a major impact on many diseases and provides an exciting avenue towards  
95 antiviral therapeutics. From patient transcriptomic data, we have discovered a circulating  
96 miRNA, miR-2392, that is directly involved with SARS-CoV-2 machinery during host infection.  
97 Specifically, we found that miR-2392 was key in driving downstream suppression of  
98 mitochondrial gene expression, increasing inflammation, glycolysis, and hypoxia as well as  
99 promoting many symptoms associated with COVID-19 infection. We demonstrate miR-2392 is  
100 present in the blood and urine of COVID-19 patients tested, but not detected in COVID-19  
101 negative patients. These findings indicate the potential for developing a novel, minimally  
102 invasive, COVID-19 detection method. Lastly, using both *in vitro* human and *in vivo* hamster  
103 models, we have developed a novel miRNA-based antiviral therapeutic targeting miR-2392 that  
104 significantly reduces SARS-CoV-2 viability and may potentially inhibit a COVID-19 disease  
105 state in the host.

106

## 107 **Key words**

108 COVID-19, SARS-CoV-2, microRNA, miRNA, Facile Accelerated Specific Therapeutic  
109 (FAST), FASTmer, miR-2392, antiviral therapeutic

110

## 111 **Introduction**

112 In Fall of 2019, the zoonotic spillover event led to the first know human infection with the  
113 severe acute respiratory syndrome coronavirus 2 (SARS-CoV-2) and subsequent human-to-  
114 human transmission triggered a pandemic leading to a worldwide health crisis from the resulting  
115 disease, referred to as coronavirus disease 2019 (COVID-19) (Huang et al., 2020; Zhu et al.,  
116 2020). COVID-19 causes substantial pulmonary disease but can also cause systemic health risks  
117 from extrapulmonary manifestations. Its effects entangle the entire body including but not  
118 limited to the cardiovascular, gastrointestinal, and hematological systems that may lead to long  
119 lasting effects after the virus has left the body, known as PASC (post-acute sequela of COVID-  
120 19) (Carfi et al., 2020; Feng et al., 2020; Gupta et al., 2020; Jacobs et al., 2020). SARS-CoV-2 is  
121 classified as a member of the Coronaviridae family, a group of viruses with a enveloped positive-  
122 stranded RNA that has the ability to infect cross-species (V'Kovski et al., 2021). Currently, three  
123 novel vaccines have completed efficacy trials and have been approved for emergency use by the  
124 Food and Drug Administration (Baden et al., 2021; Polack et al., 2020; Sadoff et al., 2021).  
125 While these vaccines represent a favorable milestone, additional data is required to demonstrate  
126 the long-term effectiveness against SARS-CoV-2 and protection against new strains. To prevent  
127 an endemic, the complete global eradication of COVID-19 will require a wide majority of the  
128 world's population to be vaccinated to achieve herd immunity. Unfortunately, there will always  
129 be a portion of the population that will not get vaccinated. Therefore, additional strategies for

130 antiviral therapeutic options against COVID-19 are particularly relevant and important to explore  
131 in order to treat severe illnesses and overcome this global pandemic. Currently the majority of  
132 antivirals are repurposed drugs utilized for other disease and have shown limited clinical  
133 efficacy, such as remdesivir (Abdelrahman et al., 2021). This brings a needed urgency to develop  
134 antivirals specifically designed against SARS-CoV-2.

135 One potential avenue for an alternative antiviral agent is treatment against specific  
136 microRNAs (miRNAs) associated with SARS-CoV-2 infection and subsequent manifestation of  
137 COVID-19. MicroRNAs (miRNAs) are non-coding RNAs that are involved with regulation of  
138 post-transcriptional gene expression and can impact entire pathways related to viruses and  
139 diseases (Jiang et al., 2009; Trobaugh and Klimstra, 2017). Each miRNA can target multiple  
140 messenger RNAs (mRNAs) and taken together, miRNAs are predicted to regulate over half of  
141 the human transcriptome (Friedman et al., 2009). Recent evidence has shown different diseases,  
142 including COVID-19, leads to distinct complements of miRNAs in the blood (Mishra et al.,  
143 2020; Nersisyan et al., 2020; Portincasa et al., 2020; Sacar Demirci and Adan, 2020; Sardar et  
144 al., 2020; Teodori et al., 2020; Widiasta et al., 2020; Zhang et al., 2021). These circulating  
145 miRNAs are highly stable and have the potential to be used for minimally invasive novel  
146 detection, potential biomarkers, and therapeutic targets (Tribolet et al., 2020). Research on the  
147 interactions between miRNAs and viruses have revealed a multifaceted relationship.  
148 Specifically, viruses have been shown to avoid the immune response by leveraging cellular  
149 miRNAs to complete their replication cycle (Trobaugh and Klimstra, 2017). The following  
150 mechanisms are central to the interaction of viruses and miRNAs: 1) miRNA processing  
151 pathways can be blocked or inhibited by viruses interacting with key proteins such as Dicer and  
152 associated proteins, 2) viruses can sequester miRNAs resulting in dysregulation of specific target  
153 mRNAs, 3) viruses can utilize miRNAs to redirect regulatory pathways of other miRNA targets  
154 to provide survival advantages, and 4) viruses can directly encode miRNA precursors that are  
155 processed by the canonical miRNA cellular pathway and have well-defined functions to  
156 specifically target and regulate the viral replicative cycle (Schult et al., 2018; Trobaugh and  
157 Klimstra, 2017).

158 Here, we report on a miRNA, miR-2392, that may directly regulate and drive a COVID-19  
159 response. This miRNA was initially predicted from COVID-19 patient data that consisted of  
160 multiple miRNAs being suppressed/inhibited (miR-10, miR-10a-5p, miR-1-3p, miR-34a-5, miR-  
161 30c-5p, miR-29b-3p, miR-155-5p, and miR-124-3p) and one miRNA being upregulated (miR-  
162 2392). With further examination, we discovered miR-2392 to be a key miRNA involved with  
163 COVID-19 progression. Specifically, miR-2392 drives downstream suppression of mitochondria  
164 activity while increasing inflammation, glycolysis, and hypoxia. MiR-2392 upregulation was  
165 concomitant with symptoms associated with COVID-19 infection in the host. We found that  
166 miR-2392 was circulating in COVID-19 infected patients and increased as a function of viral  
167 load. Our results demonstrate that miR-2392 may be utilized as an effective biomarker of  
168 COVID-19. Furthermore, we have developed a miR-2392 inhibitor and provide evidence that its  
169 use reduces SARS-COV-2 viability in targeted viral screens with A549 cells and reduces the  
170 impact of infection in COVID-19 animal models. With further development this miR-2392  
171 inhibitor may represent an effective antiviral therapeutic towards inhibiting the virus and limiting  
172 a negative host response from COVID-19.

173

## 174 **Results**

175

### 176 *Identification of key miRNAs associated with COVID-19 infection*

177 Currently, the majority of the published literature associated with miRNAs and SARS-CoV-2  
178 is based on *in silico* predictions. To identify miRNAs that may be involved in driving COVID-19  
179 severity in the host, we first examined publicly available Bronchial Alveolar Lavage Fluid  
180 (BALF) RNA-sequencing (RNA-seq) data from 13 individuals. Differential gene expression was  
181 assessed using a 1.2-fold change in gene expression for p-values less than 0.01 revealing 42  
182 increased genes and 347 decreased genes, compared to controls. Using the upstream regulator  
183 analysis from the Ingenuity Pathway Analysis (IPA) knowledge database, the miRNAs from  
184 differentially expressed genes (FDR < 0.05) from COVID-19-positive patients were inferred.  
185 Eight miRNAs were predicted to drive significant changes in COVID-19 positive patients with  
186 the downregulation of seven miRNAs (miR-10, miR-1, miR-34a-5p, miR-30c-5p, miR-29b-3p,  
187 miR-124-3p, and miR-155-5p) and upregulation of a single miRNA, miR-2392 (**Fig. 1A**). Using  
188 IPA's downstream effects analysis to predict biological processes from the combined  
189 suppression of the seven miRNAs and the upregulation of miR-2392 resulted in increased  
190 inflammation, immune suppression, and suppression of mitochondrial activity in the BALF  
191 dataset (**Fig. 1B and 1C**).

192 In support of these findings, previous studies have shown alterations in specific miRNAs  
193 may directly impact viral infections. For example, upregulation of miR-10, miR-124, or miR-1  
194 have been shown to have antiviral roles during infection (Hu et al., 2020; Sardar et al., 2020;  
195 Yang et al., 2016). Interestingly, upregulation of miR-30 and miR-155 have been shown  
196 independently to provide suppression in other types of coronaviruses (Dickey et al., 2016; Ma et  
197 al., 2018). The one miRNA predicted to be upregulated in COVID-19 patients from the BALF  
198 data was miR-2392. Though limited, the existing literature on miR-2392 demonstrates it is  
199 related to mitochondrial suppression and increased glycolysis (Fan et al., 2019) and circulating  
200 factors related to negative health risks (Chen et al., 2013; Fan et al., 2019; Hou et al., 2019; Li et  
201 al., 2017; Park et al., 2014; Yang et al., 2019).

202 Pathway analysis was performed with targets and pathways for miR-2392 to determine its  
203 impact on the host when upregulated. We observed that the upregulation of miR-2392 in the  
204 RNA-seq dataset impacted many downstream targets and pathways related to negative health  
205 outcomes (**Fig. 1C**). In addition to mitochondrial suppression, we also predicted activation of  
206 factors related to reactive oxygen species (ROS). Alternatively, since it is known that miR-2392  
207 directly interacts with the mitochondrial DNA (mtDNA) to inhibit the levels of many of the  
208 mtDNA coded oxidative phosphorylation transcripts, this could be a compensatory response to  
209 the inhibition of mitochondrial bioenergetics.

210 Glycolytic pathways (**Fig. 1C**) are also upregulated in association with increased miR-2392.  
211 MiR-2392 drives both hexokinase 2 (HK2) and pyruvate kinase (PKM) which are both positive  
212 regulators of glycolysis. HK2 phosphorylates glucose to produce glucose-6-phosphate and is a  
213 primary regulator of glycolysis. HK2 further enhances GDP-glucose biosynthesis. GDP-glucose  
214 is a nucleotide sugar which an essential substrate for all glycosylation reactions (i.e.  
215 glycosylation of viral spike proteins). Pyruvate kinase is essential for the production of ATP in

216 glycolysis as this enzyme catalyzes the transfer of the phosphate group from  
217 phosphoenolpyruvate to ADP to make ATP. The mechanism of how miR-2392 is driving these  
218 pathways is not clearly understood, but one possibility could be due to the stabilization of  
219 glycolytic transcripts.

220 Overall, the miR-2392 observed upregulation of glycolysis and antiviral effects related to  
221 miR-2392 suppression are consistent with the recently documented role of glucose metabolism in  
222 the progression of viral infection and poor outcome of COVID-19 (Ardestani and Azizi, 2021). It  
223 is also consistent with the reported effects of suppression of glycolysis by inhibitors like the  
224 glucose analog, 2-deoxy-D-glucose (2-DG), that was shown to suppress SARS-CoV-2  
225 replication in *in vitro* models (Ardestani and Azizi, 2021; Bojkova et al., 2020; Codo et al.,  
226 2020). Interestingly, 2-DG is also 2-deoxy-D-mannose and as such can interfere with processes  
227 utilizing mannose, a monosaccharide that is *in vivo* produced from glucose. Mannose plays  
228 important roles in the glycosylation of specific proteins. Replacement of a mannose molecule by  
229 2-DG in the respective SARS-CoV-2 N-glycans or O-glycans might lead to their truncation and  
230 subsequently to the suppression of virus infectivity and proliferation. These and miR-2392 data  
231 clearly indicate that selective targeting of glucose metabolism might have significant impact on  
232 current and future SARS-CoV-2 pandemics.

233 Targets related to the goals of antioxidant N-acetyl cysteine (NAC) therapy are also observed  
234 to be upregulated. These include activated endothelial cell increasing their expression of  
235 numerous adhesion molecules, including intercellular adhesion molecule 1 (ICAM1), vascular  
236 cell adhesion molecule 1 (VCAM1), and E-selectin, which allow attachment of hematopoietic  
237 immune and non-immune cells to the endothelial surface, and thus, contribute to inflammation  
238 and activation of the coagulation cascade. Powerful antioxidants such as NAC counteract  
239 COVID19 infections by potentially suppressing viral replication via improving intracellular thiol  
240 redox ratio as a precursor for major thiol antioxidant glutathione (Ho and Douglas, 1992) and  
241 inhibiting the NF- $\kappa$ B pathway (Poppe et al., 2017). Inhibition of the NF- $\kappa$ B pathway has been  
242 shown to reduce inflammatory damage by altering the glutathione and glutathione disulfide ratio  
243 (Aykin-Burns et al., 2005; Griffin et al., 2003; Jia et al., 2010). Because NAC can also modulate  
244 oxidative burst and reduce cytokine storm without weakening the phagocytizing function of  
245 neutrophils (Allegra et al., 2002; Kharazmi et al., 1988; Sadowska et al., 2006), its use in  
246 COVID-19 patients as a single agent or in combination with other antioxidants are being  
247 conducted in clinical trials (Alamdari et al., 2020). A recent study has shown noteworthy  
248 benefits of NAC in patients with severe COVID-19 infection (Ibrahim et al., 2020). Major  
249 mechanisms proposed for these favorable patient outcomes were NAC's ability to reduce IL-6  
250 induced mitochondrial oxidative stress via Complex I inhibition as well as to prevent increased  
251 inflammation due to uncontrolled activation of mTORC1. These results were in line with the role  
252 of miR-2392 in reducing the activities of electron transport chain complexes and enhancing  
253 glycolysis, which is known to be induced by mTORC1 activation. The same study also  
254 speculated that NAC could inhibit SARS-CoV-2 binding to ACE2 by reducing disulfide bonds in  
255 its receptor-binding domain. Inflammatory pathways and others that are observed with COVID-  
256 19 infection were also seen to be activated downstream of miR-2392.

257

258 *Conservation of miR-2392 between species and its predicted interactions with the SARS-CoV-2*  
259 *genome*

260 Viral miRNAs can play a role in interspecies transmission due to the high conservation of  
261 miRNAs among species and the ability of viruses to integrate miRNAs into its own genome  
262 (Sacar Demirci and Adan, 2020; Schult et al., 2018). In addition, such integration of miRNAs  
263 within the virus has been shown to assist viruses to replicate and evade the immune system  
264 (Islam and Islam, 2021). To determine if miR-2392 might be capable of driving the observed  
265 COVID-19 health risks and symptoms in the host, we analyzed the conservation of human miR-  
266 2392 across species and the integration of miR-2392 into the SARS-CoV-2 genome (**Fig. 2**).

267 The UCSC Genome Browser was utilized to determine the conservation of miR-2392 across  
268 different species (Kent et al., 2002). The mature 20 base-pair miR-2392 is derived from an 84  
269 base-pair region of the 3'-UTR in the long non-coding RNA (lncRNA) gene, maternally  
270 expressed 3 (MEG3) and located in an imprinted region DLK1-DIO3 that also contains three  
271 clusters for the expression of 51 additional miRNAs (**Fig. 2A and 2B**). A base wise evolutionary  
272 conservation comparison demonstrated that miR-2392 is highly conserved among non-human  
273 primates. In addition, conservation of miR-2392 is evident in dogs, cats, and ferrets, species  
274 known to be infected with SARS-CoV-2 while mice and rats, species not impacted by COVID-  
275 19 (Johansen et al., 2020), have poor conservation with miR-2392.

276 To determine the impact of miR-2392 on normal tissues, we studied the impact of miR-  
277 2392's host gene, MEG3, on normal tissues utilizing GTEx data (Consortium, 2020). For the  
278 majority of healthy tissues, MEG3 was either not detected or being expressed at low levels (**Fig.**  
279 **2B**). This can imply that miR-2392 does not seem to significantly affect normal tissues.

280 To explore potential binding sites for miR-2392, we used the miRanda software (Enright et  
281 al., 2003) to identify all potential binding sites with respect to the SARS-CoV-2 reference  
282 genome (Wuhan-Hu-1; NC045512.2) and representative genomes from lineages of concern. We  
283 found that the miR-2392 seeding region is heavily integrated within SARS-CoV-2 and conserved  
284 in different viral strains (**Fig. 2C**). The three best hits from the miRanda scores are located in the  
285 NSP2, NSP3, and E-genes. Notably, these regions were conserved among 6 variants and lineages  
286 of concern each represented by 14 recent genomes from the respective lineage available from the  
287 Global Initiative on Sharing All Influenza Data (GISAID, (Shu and McCauley, 2017)).

288  
289 *MiR-2392 targets mitochondrial and inflammatory pathways associated with SARS-CoV-2*

290 To determine in more detail the specific impact of miR-2392 gene targets and pathways in  
291 COVID-19 patients, miR-2392 gene targets were retrieved from the miRmap database as  
292 predicted by base pairing with its seed-region (Vejnar and Zdobnov, 2012). This list was further  
293 refined by overlap found in several other miRNA databases including miRmap (Vejnar and  
294 Zdobnov, 2012), miRwalk (Dweep and Gretz, 2015), miRDB (Chen and Wang, 2020), miRnet  
295 (Chang et al., 2020b), and ClueGo (Bindea et al., 2009). We also included RNA-seq analysis of  
296 39 autopsy tissue samples from the heart, lung, kidney, liver, and lymph node of COVID-19-  
297 positive patients with high or low viral loads (Park et al., 2021). The refined list of miR-2392  
298 gene targets (consisting of 375 genes) was examined using volcano plots in all samples (**Fig. 3A-**  
299 **F**).

300 To better determine the systemic impact on miR-2392 gene targets in COVID-19, we  
301 performed pathway analysis from the nasopharyngeal swab samples in living donors with and  
302 without COVID-19 using the SARS-CoV-2 viral load as the independent variable (high,  
303 medium, low, other virus). The miR-2392 gene targets are differentially expressed (FDR<0.05)  
304 in at least one comparison of COVID-19-positive patients or other detected virus and were found  
305 to separate into six distinct hierarchical clusters that were identified and annotated utilizing  
306 ShinyGO (Ge et al., 2020) to determine the major pathways altered (**Fig. 3G**). The majority of  
307 these upregulated miR-2392 targets are involved in immune and inflammatory pathways. The  
308 downregulated miR-2392 targets were involved in mitochondrial function, oxidative stress, cell  
309 cycle, developmental biology, and ubiquitin binding which are pathways recently associated with  
310 the SARS-CoV-2 infection process (Hemmat et al., 2021). This data demonstrates miR-2392  
311 may target several gene pathways related to perpetuating SARS-CoV-2 infection. For the  
312 majority of the tissues (excluding the lymph nodes), higher viral loads are associated with greater  
313 miR-2392 gene targets being regulated. Interestingly, the lymph nodes show an inverse  
314 relationship with viral loads compared to other tissues.

315 Because miR-2392 was recently shown to directly target the transcription of mitochondrial  
316 DNA genes (Fan et al., 2019), we evaluated the impact on expression of the mitochondrial miR-  
317 2392 targets in our datasets. Differentially expressed miR-2392 target mitochondrial genes were  
318 identified using the MitoCarta database (Rath et al., 2021) (**Fig. 3H**). This revealed 14 genes  
319 harboring miR-2392 seed sequences that were significantly dysregulated in the nasal and heart  
320 samples. In nasal samples, SLC25A28, mitoferrin which mediates mitochondrial iron transport,  
321 was strongly upregulated along with IBA57, which is involved in iron sulfur assembly. The  
322 mitochondrial outer membrane protein import complex subunit TOMM20, cytochrome c oxidase  
323 (complex IV) subunit COX6B1, and mitochondrial transcription factor COT-2 (NR2F2) were  
324 strongly down regulated. In the heart, the folate enzyme MTHFD2L (methylenetetrahydrofolate  
325 dehydrogenase) was up-regulated while all of the other nuclear-coded mitochondrial genes  
326 identified were down regulated. Downregulated heart mitochondrial genes included NDUFS5  
327 (complex I subunit), COX6B1 and COX10 (complex IV structural and assembly subunits),  
328 CKMT1A (mitochondrial creatine kinase), MRPL34 (subunit of the large subunit of the  
329 mitochondrial ribosome), COT-2 (NR2F2), AK4 and MSRB3 (adenylate kinase 4 and  
330 methionine-R-sulfoxide reductase which mitigate oxidative stress), MRS2 (magnesium  
331 transporter) and CLIC4 (chloride channel). The kidney showed mild upregulation of complex I  
332 and single methyl group metabolism, but down regulation of complex IV (COX10), regulatory  
333 factor (COT-2), and iron sulfur center protein (IBA57). Hence, SARS-CoV-2 seems to  
334 downregulate nuclear mitochondrial gene transcription in the more oxidative heart and kidney, as  
335 well as in nasal tissues.

336 Since inflammation is a key component of COVID-19 infection, we also overlaid the  
337 standard known inflammatory genes determined from Loza et al. (Loza et al., 2007) to the miR-  
338 2392 targets (**Fig. 3I**). The analysis reveals that, at the mRNA level, most of the complement  
339 pathway genes are upregulated in the tissue samples analyzed. These changes could be  
340 compensatory, as proteins encoded by the genes could be downregulated as a function of  
341 traditional miRNA effects. The responses reflect the importance of degrees of inflammation for



342 mediation of disease severity in COVID-19 patients and a key modulatory role of miR-2392 in  
343 this context.

344 Proteomic and transcriptomic analysis on miR-2392 targets on blood from COVID patients  
345 utilizing COVIDome (Sullivan et al., 2021) revealed interesting patterns between RNA and  
346 protein levels for miR-2392 targets (**Fig. 3J and 3K**). We utilized the miR-2392 gene targets  
347 only determined through miRmap to determine a broader relationship between the proteins and  
348 genes. Several miR-2392 targets in the tissue show a significant transcription increase in  
349 COVID-19-positive samples with small to no changes on the proteomics level: PLK1, CD38,  
350 PYCR1, RNASE1, BIRC5, RRM2, SIGLEC1 (**Fig. 3J**). Interestingly, all these genes were also  
351 positively regulated for the majority of tissues when considering only miR-2392 gene targets  
352 with miRmap (**Figs. S1 and S2**). In the blood, the miR-2392 targets CXCL10, STAT1, IFIT3,  
353 and C1QC were positively regulated at both the protein and gene levels. This upregulation was  
354 also observed in all other tissues (**Figs. S1 and S2**). We explored the correlation between RNA  
355 expression and protein abundance for miR-2392 targets in COVID-19 positive and negative  
356 samples (**Fig. 3K**). Pearson correlation in both sample types is very close, with a slightly  
357 stronger value in COVID-19 negative samples (negative samples  $cor=0.2089863$ ,  $p\text{-value}=4e-10$ ,  
358 positive samples  $cor=0.2053345$ ,  $p\text{-value}=8e-10$ ). Further investigation is needed to understand  
359 if increased levels of miR-2392 could potentially bind genes' mRNAs at a higher rate and  
360 therefore prevent translation to protein or if there are other mechanisms preventing mRNA  
361 translation to protein.

362

#### 363 *Overexpression of miR-2392 simulates a phenotype similar to COVID-19 infection*

364 To determine if the upregulation of miR-2392 alone would elicit effects similar to a COVID-  
365 19 infection, cells were treated with a miR-2392 mimic. Using RNA-seq data, there were 649  
366 genes with a fold-change greater than  $\pm 1.2$  and a p-value less than 0.05 (**Fig. 4A**). A number of  
367 these differentially expressed genes were predicted targets of miR-2392 (**Fig. 4B**). Of particular  
368 interest are differentially expressed genes in this model that are also dysregulated in SARS-CoV-  
369 2 infected cells. We analyzed whole cell proteome data from a human-derived cell culture model  
370 for a SARS-CoV-2 infection profile (Stukalov et al., 2021), and found 10 proteins that were  
371 significantly changed in abundance and were also altered with miR-2392 overexpression: KIF22,  
372 FKBP14, RAD51, AFAP1, ZCCHC17, ZWINT, MAGED1, CENPF, TMEM70, and NFKB2  
373 (**Fig. 4C**). Viral infection is associated with alterations in protein posttranslational modifications  
374 of cellular proteins, including ubiquitination. This phenomenon can occur by viral or host  
375 directed modifications. We analyzed the ubiquitinome of the human-derived cell culture model  
376 of SARS-CoV-2 infection and observed a number of proteins that were increased or decreased in  
377 normalized ubiquitin abundance and were also dysregulated genes by miR-2392 overexpression.  
378 Furthermore, we found miR-2392 overexpression impacted genes involved with mitochondria,  
379 and inflammation (**Fig. 4D-4F**).

380 To determine if there was a direct correlation between miR-2392 overexpression and SARS-  
381 CoV-2 infection, comparisons were made using gene expression fold-change values or overlap in  
382 statically significant curated gene sets from canonical pathways determined by our fgSEA  
383 analysis. Using previously published data from Blanco-Melo *et al.* (Blanco-Melo et al., 2020),  
384 showed there was a statistically significant and positive correlation of the miR-2392 treatment

385 compared to both the A549 and Calu-3 cell culture models infected with SARS-CoV-2 (**Fig. 4G**  
386 **and 4H**) as well as in lung biopsies post-mortem from two COVID-19 positive patients (**Fig.**  
387 **4H**). Using nasal swab samples, a significant and positive correlation was determined between  
388 patients with medium- and low-viral loads compared to non-infected patients (**Fig. 4I and 4J**).  
389 Further identification of miR-2392 correlation to SARS-CoV-2 infections was made using RNA-  
390 seq from multiple tissues (heart, kidney, liver, lymph node, and lung) obtained during autopsies  
391 of COVID-19 patients with high or low viral loads (**Fig. 4I-J**). There was a positive correlation  
392 to lung and lymph node tissues with miR-2392 expression. Interestingly, there was a significant  
393 and positive correlation to liver tissue when comparing gene fold-change values (**Fig. 4I**) but not  
394 fGSEA curated biological genesets (**Fig. 4J**). In contrast, a negative correlation to heart tissue  
395 was observed.

396 Statistically significant pathways that were enriched due to miR-2392 treatment were  
397 examined using fGSEA (**Fig. 4K-O**). It was observed that the miR-2392 treatment induced  
398 pathway response that was significantly related to SARS-CoV-2 pathways. One obvious  
399 relationship shows that the Reactome SARS-CoV-2 pathways were significantly activated for the  
400 miR-2392 treated cells compared to the controls (**Fig. 4K and 4L**). Significant Hallmark  
401 pathways (**Fig. 4N**) show distinct pathways that have been reported to be associated with  
402 COVID-19 in patients, such as upregulation of hypoxia (Herrmann et al., 2020), glycolysis  
403 (Ardestani and Azizi, 2021), and cell cycle pathways (Su et al., 2020). Interestingly, the KEGG  
404 pathway analysis (**Fig. 4M**) indicates the overexpression of miR-2392 treated highly upregulated  
405 systemic lupus erythematosus which has been reported to occur in COVID-19 patients and have  
406 shown similar pathologies due to the increase of inflammation (Zamani et al., 2021).

407 Lastly, we determined the impact of miR-2392 specific targets being downregulated in the  
408 cell lines after miR-2392 overexpression. A regulatory network was built by including the  
409 predicted miR-2392 targets in the microRNA Data Integration Portal (MIRDIP) that were also  
410 downregulated in the overexpression cell model as well as from the recently described consensus  
411 transcriptional regulatory networks in coronavirus infected cells (Ochsner et al., 2020) (**Fig. 4P**).  
412 The gene enrichment analysis of these putative miR-2392 targets showed the presence of GO-  
413 terms related with the RNA metabolism, transcription, ribosome activity and Golgi complex  
414 (**Fig. 4Q**).

415

#### 416 *Circulating miR-2392 and the suppression of other miRNAs in COVID-19 infected patients*

417 To demonstrate the presence of circulating miR-2392 in COVID-19 infected patients, we  
418 quantified the amount of miR-2392 by droplet digital PCR (ddPCR) in the serum, urine and  
419 nasopharyngeal swab samples (**Fig. 5**). For the serum there were ten COVID-19 positive  
420 intubated patients, ten COVID-19 positive patients (not intubated), and ten negative patients. For  
421 the urine samples there were 15 inpatient COVID-19 positive samples, 15 outpatient COVID-19  
422 positive samples, 10 inpatient COVID-19 negative samples, and 11 COVID-19 negative healthy  
423 donors. Lastly, we quantified nasopharyngeal swab samples from 10 COVID-19 positive patient  
424 samples, 6 common cold coronavirus positive patient samples (229E, HKU1, and OC43), and 6  
425 Respiratory Illness/Coronavirus NL63 positive patient samples. In addition, we also quantified  
426 three other miRNAs which we predicted to be inhibited by COVID-19 infection (**Fig. 1A**) which  
427 were: miR-1-3p (**Fig. S3**), miR-155-5p (**Fig. S4**), and miR-124-3p (**Fig. S5**).

428 We observed a statistically significant increase of miR-2392 in COVID-19 positive patients  
429 from both the serum and urine samples (**Fig. 5A**). In addition, Receiver Operating Characteristic  
430 (ROC) curve analysis revealed that miR-2392 is significantly associated with SARS-CoV-2  
431 infection in patients (**Fig. 5B**) in all tissues. Lastly, when dissecting the amounts of miR-2392  
432 with specific conditions associated with infection, we observe that more severely affected  
433 patients (i.e. intubated patients or patients in ICU), had higher presence of miR-2392 (**Fig. 5C**).  
434 Interestingly, low levels miR-2392 appeared in the nasopharyngeal location with no significant  
435 differences occurring between seasonal coronavirus samples. Since we hypothesize that miR-  
436 2392 is a primary initiator for systemic impact of the infection, this might indicate that miR-2392  
437 does not strongly appear until the virus has established its presence in the body.

438 As mentioned above we also measured the quantity of miR-1-3p (**Fig. S3**), miR-155-5p (**Fig.**  
439 **S4**), and miR-124-3p (**Fig. S5**) and performed the same analysis. For miR-1-3p we observed  
440 significant suppression in the serum while no significant differences in the urine or  
441 nasopharyngeal samples (**Fig. S3**). MiR-1-3p is known to be beneficial for cardiovascular  
442 functions, with the inhibition of miR-1-3p leading to heart failure and heart disease (Condorelli  
443 et al., 2010). Similar response was observed for miR-155-5p with significant suppression in the  
444 serum while no significant differences in the urine or nasopharyngeal samples (**Fig. S4**). For  
445 miR-124-3p, we observed very low amounts (on average < 2 copies/5 ng RNA), for all  
446 conditions, which indicates that miR-124-3p is not circulating for any of the patients for any the  
447 conditions observed (**Fig. S5**). MiR-124-3p provides as an ideal miRNA negative control  
448 candidate for SARS-COV-2.

449

#### 450 *Inhibiting miR-2392: a novel antiviral COVID-19 therapeutic*

451 The link that we found between miR-2392 and COVID-19 infection prompted us to ask  
452 whether we could develop effective antivirals for COVID-19 by inhibiting miR-2392. We used  
453 the Facile Accelerated Specific Therapeutic (FAST) platform to develop an effective antisense-  
454 based therapeutic against human miR-2392 (Aunins et al., 2020; Eller et al., 2021), termed  
455 SBCov207, for the treatment of COVID-19 (**Fig. 6A**). The FAST platform combines the four  
456 essential modules of drug development cycle (design, build, test, and learn) to optimize  
457 therapeutics against any gene and species of interest in less than a week. The anti-miR-2392  
458 FASTmer was evaluated for efficacy and toxicity against a SARS-CoV-2 infection of the human  
459 lung cell line A549 (**Fig. 6B-D**). Treatment of uninfected A549 cells showed no cytotoxicity up  
460 to 20  $\mu$ M. The control nonsense FASTmer (SBCov208) showed no toxicity even up to 40  $\mu$ M.  
461 Treatment of A549 cells infected with SARS-CoV2 showed drastic improvement in cell viability  
462 with an average of 85% viral inhibition at 10  $\mu$ M (IC<sub>50</sub> of  $1.15 \pm 0.33 \mu$ M). In contrast, the  
463 control nonsense FASTmer showed significantly lower viral suppression (**Fig. 6E-G**). Human  
464 cell line-based infection models reaffirm that the anti-miR-2392 (SBCov207) is effective in  
465 inhibiting SARS-CoV2, while not exhibiting toxicity at the concentrations tested.

466 In a separate *in vivo* model, the anti-miR-2392 FASTmer was evaluated in a Syrian hamster  
467 infection model (**Fig. 6H-6J**). Initially six hamsters were treated with FASTmers for 72 hours  
468 without infection to observe any changes in animal behavior indicating toxicity. There were no  
469 observed changes in animal behavior indicating a lack of obvious toxicity. Following this study,  
470 30 male hamsters were divided into 5 treatment groups. The infected hamsters were given  $10^5$

471 plaque forming units (pfu) of WA01/2020 strain of SARS-CoV-2 passaged twice in Vero E6  
472 cells from the original isolate obtained from BEI Resources. The anti-miR-2392 FASTmer  
473 treatment was given by intraperitoneal (IP) injection or intranasal (IN) instillation 24 hours  
474 before viral inoculation or both 24 hours before and 24 hours after viral inoculation. Each  
475 FASTmer dose was at a concentration of 10  $\mu$ M in a 100  $\mu$ L volume (approximately 0.13  
476 mg/kg). Half of the hamsters in each group (n = 3) were euthanized and necropsied on day 3 and  
477 7 post-infection respectively.

478 Loss of body weight of hamsters over the course of the experiment were <10% in all groups  
479 and significantly different for the IN treatment one day before viral inoculation (compared to the  
480 control) and while statistical differences between other groups were not present (**Fig. 6H**). Virus  
481 titers from oropharyngeal swabs of hamsters receiving IN treatment were significantly lower ( $p =$   
482 0.018) than those from hamsters receiving FASTmers IP or PBS on day 1 post-challenge, but  
483 there were no differences among groups in magnitude of shedding on days 2 and 3 post-  
484 challenge (**Fig. 6I**). Although not statistically different than the control treatment, the data  
485 indicates a downward trend with FASTmer treatment (**Fig. 6J**). In addition, the total  
486 histopathological score for the IN was lower than the controls although not significant.

487

488 *The impact of miR-2392 on diseases, relationship to COVID-19 symptoms, and predicted FDA*  
489 *drugs to target miR-2392*

490 To predict whether miR-2392 might have a direct relationship to COVID-19 symptoms in the  
491 host, we determined the pathway and disease relevance of miR-2392 using miRnet (Chang et al.,  
492 2020b). Among the diseases predicted to be associated with miR-2392 were a surprising number  
493 of clinical observations present in individuals with COVID-19 infection (**Fig. 7A**). These include  
494 heart or cardiovascular disease and failure, both known to heavily contribute to morbidity and  
495 mortality in patients with COVID-19 (Nishiga et al., 2020), hyperesthesia (Krajewski et al.,  
496 2021), as well as less common COVID-19 symptoms, such as lymphadenopathy and pharyngitis  
497 related to sore throat (Edmonds et al., 2021; Walsh-Messinger et al., 2020), liver dysfunction  
498 (Portincasa et al., 2020), splenomegaly (Malik et al., 2020), CNS (Mahajan and Mason, 2021;  
499 Rodriguez et al., 2020) and kidney failure (Hultstrom et al., 2021).

500 It is interesting to note that miR-2392 was also predicted to affect diseases that appeared not  
501 to be associated with COVID-19 infection, but literature searches reveal these pathologies do  
502 occur in some COVID-19 patients. For example, azoospermia, which is linked to male infertility,  
503 has been shown to occur in some male patients (Younis et al., 2020). The menstrual cycle in  
504 females have been reported to be deregulated for months after COVID-19 infection (Li et al.,  
505 2021). Association with dental damage has also been observed in COVID-19 patients (Sirin and  
506 Ozcelik, 2021), also deafness or hearing loss (Koumpa et al., 2020). We used the tool Kaplan-  
507 Meier Plotter (Nagy et al., 2018) to associate miR-2392 expression with pan-cancer patient  
508 survival (**Fig. S7**). We observed that the high expression of miR-2392 is generally related to poor  
509 prognosis with the majority of cancer types ( $p$ -value < 0.05). If miR-2392 is associated with  
510 COVID-19, as we are hypothesizing, and is persistent after the virus clears the host, then the  
511 implications for the potential long-term impact on the millions of people infected with COVID-  
512 19 could be devastating. Intriguingly, one of the miR-2392 predicted consequences in the

513 immune category is decreased antibody levels in the blood; this might account for the reported  
514 loss of the antibodies overtime (Gudbjartsson et al., 2020; Self et al., 2020).

515 Using computational prediction models, we also predicted small molecules, including FDA-  
516 approved drugs that could inhibit miR-2392 from two different approaches. The first approach  
517 employed a state-of-the-art machine learning method that we recently developed for predicting  
518 missing drug targets (Galeano et al., 2021). We applied this algorithm on an association dataset  
519 between 213 small molecules and 1,519 miRNAs from the SM2miR database (Liu et al., 2013)  
520 (see statistics in **Fig. S8**). Our model also integrated chemical similarity between small  
521 molecules and sequence similarity between miRNAs. In ten-fold cross-validation experiments,  
522 we achieved an average area under the receiver operating curve of 0.877 when predicting  
523 missing small molecule-miRNA associations (**Fig. S9**). A list of the top-20 predicted small  
524 molecules for miR-2392 (**Fig. 7B**) includes Dexamethasone, the first drug known to save lives in  
525 critically ill COVID-19 patients (Ledford, 2020), and Atorvastatin, that has shown similar  
526 protective role in COVID-19 patients (Rossi et al., 2020). The second approach follows ideas  
527 first presented in Sirota *et al.* (Sirota et al., 2011) and consists on analyzing the genomic signature  
528 of miR-2392 (*i.e.* significant up and down-regulated genes) and predicting small molecules that  
529 can reverse it. We screened the genomic signature of miR-2392 against the genomic signature of  
530 30,000 small molecules contained in the connectivity map (CMAP) (Lamb et al., 2006). The top-  
531 20 small molecules predicted by our approach (Sirota et al., 2011) includes the androgen receptor  
532 antagonist Enzalutamide and the insulin sensitizer Pioglitazone (Carboni et al., 2020) both of  
533 which are in clinical trials for COVID-19 (**Fig. 7C**; Clinical Trial #NCT04475601 and  
534 NCT04604223). We also found literature evidence for the leukotriene inhibitor ubenimex (Asai  
535 et al., 2020), and the bacterial DNA inhibitor metronidazole (Gharebaghi et al., 2020).

536

## 537 **Discussion**

538 While the potential eradication of the novel coronavirus through worldwide vaccination is  
539 underway, there remains a major need to develop effective interventional strategies to minimize  
540 the damage caused by coronavirus infections. Host-mediated lung inflammation is a driver of  
541 mortality in COVID-19 critically ill patients. Thus, it is logical to focus on therapeutics that may  
542 have immunomodulating properties or disrupt viral replication. Our research uncovers a novel  
543 eight miRNA signature in patients with COVID-19 viral loads compared to those without disease  
544 as predicted from RNA-seq data. The expression of seven miRNAs was decreased (miR-10,  
545 miR-1, miR-34a-5p, miR-30c-5p, miR-29b-3p, miR-124-3p, and miR-155-5p) while a single  
546 miRNA, miR-2392, was significantly increased (**Fig. 1**). This key miRNA signature was  
547 involved in major cellular and molecular mechanisms that drives the viral-host response.

548 From previous research, the upregulation of miR-10a-5p, from the miR-10 precursor  
549 miRNA, provides antiviral benefits through the suppression of SDC1 that can act as a defense  
550 mechanism for Porcine hemagglutinating encephalomyelitis viruses (Hu et al., 2020). The  
551 upregulation of miR-124 is shown to inhibit the Japanese encephalitis virus replication (Yang et  
552 al., 2016). Notably, the upregulation of mir-30c-5p and miR-155-5p have been independently  
553 shown to be involved with antiviral functions through immune and inflammatory pathways with  
554 other type of coronaviruses (Dickey et al., 2016; Ma et al., 2018). It was also indicated that  
555 inhibition of miR-34a-5p in the host by SARS-CoV-2 suppresses beneficial antiviral pathways

556 that this miRNA regulates. (Bartoszewski et al., 2020; Sacar Demirci and Adan, 2020). miR-1-3p  
557 has previously been identified as an antiviral agent for viral related respiratory diseases and the  
558 downregulation by SARS-CoV-2 is predicted to follow similar pathways for survival in the host  
559 (Sardar et al., 2020). Examination of patients with COVID-19 showed increased levels of miR-  
560 2392 circulating blood (**Fig. 5**). Interestingly, we show that for both miR-1-3p and miR-155-5p  
561 from serum patient samples were significantly inhibited (**Figs. S3 and S4**), which is in  
562 agreement with the current viral literature as discussed above. MiR-124-3p was shown to have  
563 no significant changes and barely present for SARS-CoV-2 patients (**Fig. S5**), indicating the  
564 responses discussed above is potentially specific for Japanese encephalitis virus.

565 Several studies have measured differential expression of miRNAs in COVID-19 patients and  
566 proposed their use as biomarkers or therapeutics. A post-mortem examination from lung biopsies  
567 in nine COVID-19 patients compared to controls found miR-26a, miR-29b, and miR-34a were  
568 correlated to endothelial dysfunction and inflammatory biomarkers (Centa et al., 2020). In a  
569 separate study performing multi-transcriptome sequencing in red blood cell depleted whole  
570 blood from moderate or severe COVID-19 patients four additional miRNAs, miR-146a, miR-21,  
571 miR-142, and miR-15b, were identified as potential biomarkers as well as contributors to disease  
572 pathogenesis (Tang et al., 2020). It has also been suggested to use miRNAs to target the  
573 angiotensin-converting enzyme 2 (ACE2) receptor that facilitates endocytosis of viral particles  
574 into the cells to limit virus-induced glomerular injury, cell infection, kidney damage (Mishra et  
575 al., 2020; Nersisyan et al., 2020; Pontecorvi et al., 2020; Sacar Demirci and Adan, 2020; Sardar  
576 et al., 2020; Teodori et al., 2020; Widiasta et al., 2020). While these studies are limited to a  
577 specific tissue, our data that correlates miRNA signatures from multiple tissues (**Fig. 3**) suggests  
578 miR-2392 is a unique target that is ubiquitously involved in COVID-19 symptoms.

579 In 2010, miR-2392 was found in a small-RNA deep-sequencing of normal and malignant  
580 human B-cells where it was altered among hundreds of other microRNAs (Jima et al., 2010).  
581 Since then, the majority of publications with miR-2392 are focused on cancer tissues and have  
582 found a potential role for miR-2392 in driving cellular invasion and metastasis through an  
583 epithelial-mesenchymal transition. In 2013, miR-2392 was one of 6 circulating microRNAs  
584 altered in the serum and tissue of patients with cervical squamous cell carcinoma that was used  
585 to predict the occurrence of lymph node metastasis with the potential to assist in clinical staging  
586 (Chen et al., 2013). Higher levels of miR-2392 in gastric cancer was found to be associated with  
587 lower clinical staging and increased patient survival (Li et al., 2017). It was shown that miR-  
588 2392 inhibited gastric cell invasion and metastasis by targeting MAML3 and WHSC1 for  
589 degradation that subsequently decreased an epithelial-mesenchymal transition through the loss of  
590 Snail1, Slug, and Twist1 expression. Similarly, miR-2392 and miR-1587 were found to target the  
591 ZEB2 protein, a promoter of the epithelial-mesenchymal transition. A lower expression of these  
592 two miRNAs were found in human keloid tissues that resulted in a loss of inhibition of ZEB2  
593 and subsequent promotion of cellular proliferation and invasion in keloids (Hou et al., 2019).  
594 Inhibition of miR-2392 by the long-non-coding RNA CACNA1G-AS1 was found to promote  
595 hepatocellular carcinoma through disrupting the degradation of C1orf61, a tumor activator  
596 associated with metastasis and tumor progression (Hu et al., 2013; Yang et al., 2019). Recently,  
597 Fan et al. demonstrated a novel role for miR-2392 in the regulation of chemoresistance in tongue  
598 squamous cell carcinoma by partial inhibition of mitochondrial DNA (mtDNA) transcription

599 through direct miRNA-mtDNA base pairing which resulted in reprogramming tumor cell  
600 metabolism (Fan et al., 2019). These reports for miR-2392 establish the significant impact this  
601 single miRNA may have in on cellular activity. Particularly relevant to this study was the altered  
602 expression of miR-2392 found in Hepatitis B viral infections. Its expression was found to be  
603 increased by more than 2-fold in extracellular vesicles secreted from human hepatocytes infected  
604 with the Hepatitis B virus (Enomoto et al., 2017). While miR-2392 has a reported impact on  
605 tumor cell biology, our study expands the valuable therapeutic potential of targeting miR-2392 to  
606 subsequently decrease SARS-CoV-2 viral infections (**Fig. 6**). These results warrant further  
607 exploration of the mechanistic underpinnings for the role of miR-2392 in driving viral infection.

608 One therapeutic insight deduced from miR-2392 interactions is the importance of the  
609 mitochondrial oxidative phosphorylation (OXPHOS) and glycolytic pathways in COVID-19,  
610 dramatically highlighted in BALF samples reported in **Fig. 1C**. In a study of tongue squamous  
611 cell carcinoma (Fan et al., 2019) it was reported that miR-2392 enters the mitochondrion where it  
612 binds to Ago2 and then binds to nucleotides 4379 to 4401 in the mtDNA heavy (H) strand. This  
613 binding site is within the MT-TQ (tRNA glutamine) gene, which encompasses nucleotides  
614 m.4329-4400. MT-TQ is part of a large polycistronic transcript transcribed from the H-strand  
615 promoter. This transcript encompasses 12 of the mtDNA H strand polypeptide genes punctuated  
616 by tRNAs. Cleavage of the tRNAs releases the mRNAs. Up-stream of MT-TQ are the 12S and  
617 16S rRNAs and the complex I gene MT-ND1 gene. Downstream of MT-TQ is MT-ND2, MT-  
618 CO1, MT-CO2, MT-ATP6/8, MT-ND3, MT-ND4L, MT-ND4, MT-ND5, and MT-CYB (Lott et  
619 al., 2013; Wallace, 2018). Strikingly, the down-regulated mtDNA genes from the BALFS are the  
620 complex IV (cytochrome c oxidase) genes MT-CO1 and MT-CO2, the complex III (the bc<sub>1</sub>  
621 complex) gene (MT-CYB), and the complex I genes (MT-ND2, MT-ND4, and MT-ND5) (**Fig.**  
622 **1C** right side arc). Since the miR-2392 inhibition of mtDNA OXPHOS genes shown for the  
623 BALF samples (**Fig. 1C**) is also reflected in the miR-2392 down-regulation of the nuclear DNA  
624 coded mitochondrial transcripts of the complex I and IV genes and the iron-sulfur and heme iron  
625 complexes in the nasal, heart, and kidney autopsy samples (**Fig. 3D**), mitochondrial inhibition by  
626 miR-2392 appears to be the only physiological function that is common across all tissues in  
627 infected individuals. This suggests that mitochondrial modulation is a central feature of SARS-  
628 CoV-2 pathophysiology.

629 The inhibition of mitochondrial genes by miR-2392 would impair OXPHOS, which would  
630 have the most adverse effects on the high mitochondrial energetic tissues (brain, heart, kidney),  
631 the tissues central to the most severe COVID-19 cases. Inhibition of mitochondrial OXPHOS  
632 genes would increase mitochondrial reactive oxygen species (mROS) production, and induce  
633 glycolysis to compensate for the energy deficit (see top of **Fig 1C**). Mitochondrial function is  
634 regulated by the Sirtuins (Carrico et al., 2018), mitochondrial decline is associated with  
635 senescence, and mROS oxidation of mtDNA is linked to activation of the inflammasome and  
636 thus NFκB (West et al., 2015; West and Shadel, 2017; Zhong et al., 2018), all of which are  
637 modulated around miR-2392 (**Fig. 1C**). Thus, SARS-CoV-2 induction of miR-2392 (**Fig. 5**) and  
638 its associated inhibition of mtDNA and nuclear DNA OXPHOS genes (**Fig. 3** and **S1**) could  
639 explain many of the metabolic disturbances of COVID-19. Conversely, antagonism of miR-2392  
640 function should ameliorate the inhibition of OXPHOS and may explain the therapeutic benefit of  
641 the anti-miR-2392 FASTmers.

642 Using miRNAs from serum as a biomarker was first established in patients for the  
643 examination of diffuse large B-cell lymphoma (Lawrie et al., 2008). The use of miRNAs as a  
644 diagnostic biomarker has several advantages. Circulating miRNAs are readily obtained through a  
645 minimally invasive blood draw and are remarkably resistant to degradation in the plasma and  
646 serum (Mitchell et al., 2008). Measuring differentially expressed miRNAs may also provide a  
647 means to detect asymptomatic individuals as previously demonstrated in another viral infection  
648 (Hou et al., 2017). However, potential confounding diseases that may influence the expression of  
649 multiple miRNAs requires the further evaluation of the targets found in this study (**Fig. 5**).

650 Recent advances in RNA chemistry and delivery systems enabled the first miRNA-based  
651 agents to enter into clinical trials several years ago (Rupaimoole and Slack, 2017). It was  
652 discovered that miR-122 increased the stability and replication of the Hepatitis C virus (HCV)  
653 through binding to the 5' end of the non-coding region that prevented degradation by the Xrn1  
654 exoribonuclease (Jopling et al., 2005; Thibault et al., 2015). In a phase I clinical trial, a 15-  
655 nucleotide phosphorothioate DNA-locked nucleic acid anti-miRNA that is designed to inhibit  
656 miR-122 was first used and demonstrated no adverse reactions. In a subsequent phase IIa trial of  
657 36 patients, there was a significant dose-dependent decrease in HCV load, one patient reported a  
658 grade 3 adverse event (thrombocytopenia), and only a small set of patients experienced viral  
659 rebound that may be linked to mutations of the HCV viral RNA (Janssen et al., 2013; Ottosen et  
660 al., 2015). A separate clinical trial with a N-acetyl-Dgalactosamine (GalNAc)-conjugated anti-  
661 miRNA targeting miR-122 and antiviral agents (ledipasvir and sofosbuvir) was successful in  
662 reducing viral loads in all treated patients within 4 weeks of treatment as well as sustained viral  
663 response in three patients after 76 weeks of follow-up (van der Ree et al., 2017), however  
664 subsequent treatments have been suspended due to two cases of severe jaundice. These clinical  
665 trials have demonstrated the promising potential of using anti-miRNAs to significantly reduce  
666 viral infection with limited adverse effects and the similarities with miR-2392 with SARS-CoV-2  
667 warrant further investigations to push to clinical trials.

668 Presently, there remains no specific treatment option for patients presenting with severe  
669 COVID-19 disease. While vaccines provide a promising avenue towards preventing the  
670 development of these symptoms as well as curbing the infection rate, there remains an urgency to  
671 successfully develop and implement therapeutic agents to reduce severe consequences from  
672 infection and subsequent patient mortality. As the testing of antibody-based or drug targeted  
673 therapies are currently underway, the added utility of miRNAs represents a novel category of  
674 therapeutic agents that have previously shown endogenous activity to alter viral infection.

675  
676 **Acknowledgments:** This work was supported by supplemental funds for COVID-19 research  
677 from Translational Research Institute of Space Health through NASA Cooperative Agreement  
678 NNX16AO69A (T-0404 to A.B. and T-0406 to A.C.) and further funding from KBR, Inc  
679 provided to A.B; this work used resources services, and support provided via the COVID-19  
680 HPC Consortium (<https://covid19-hpc-consortium.org/>) which is a unique private-public effort to  
681 bring together government, industry, and academic leaders who are volunteering free compute  
682 time and resources, in support of COVID-19 research and resources supporting this work were  
683 provided by the NASA High-End Computing (HEC) Program through the NASA Advanced  
684 Supercomputing (NAS) Division at Ames Research Center which was awarded to A.B.; DOD  
685 W81XWH-21-1-0128 awarded to D.C.W.; NIGMS P20 GM1009005 awarded to N.A.;



686 Individual National Research Service Award F32-AI147587 awarded to J.M.D.; NIH/NHBLI  
687 K08 HL143271 and NIH/NHLBI R03 HL155249 awarded to R.S.H.; NIH/NCI U54 CA260543  
688 supported R.S.H., N.M.B., M.C.W.; NSF 1956233 awarded to R.M.; A.P. was supported by  
689 Biotechnology and Biological Sciences Research Council (<https://bbsrc.ukri.org/>) grants  
690 BB/K004131/1, BB/F00964X/1 and BB/M025047/1, Consejo Nacional de Ciencia y Tecnología  
691 Paraguay - CONACyT (<http://www.conacyt.gov.py/>) grants 14-INV-088 and PINV15-315,  
692 National Science Foundation Advances in Bio Informatics (<https://www.nsf.gov/>) grant  
693 1660648; D.G. and A.P. were supported by the CONACyT grant PINV20-337 and the Fundação  
694 Getulio Vargas. N.M.B. was supported by the National Center for Advancing Translational  
695 Sciences (NCATS), NIH UL1TR002489, 2KR1272005, 550KR242003.

696

#### 697 **Author contributions**

698 Conceptualization: A.B.; Methodology: A.B.; Formal Analysis: A.B., R.M., C.V., D.T., F.J.E.,  
699 C.M., C.M., J.C.S., J.T.M., J.M.D., D.G., U.S., E.S.W., A.S., J.F., V.Z., N.S., T.J.T.;  
700 Investigation: A.B., C.V., R.M., C.E.M., A.C., P.N., M.F., R.A.B., M.M., S.L.M., A.Y., T.R.A.;  
701 Sample Collection: M.M.S., M.C.W., R.S.H., N.M.B., U.C.P.C., A.D.H., J.C.; Resources: A.B.,  
702 R.M., C.E.M., A.C., M.S., M.F., M.C.W.; Writing – Original Draft: A.B., J.T.M.; Writing –  
703 Review & Editing: A.B., J.T.M., F.J.E., R.J.G., W.P., M.M.S., J.M.D., J.W.G., D.W., S.B., V.Z.,  
704 E.S.W., S.V.C., N.A., A.P., D.G., M.F., P.M.C., M.M., M.R.E., J.C.S., A.C., R.M., N.S., T.J.T.,  
705 B.C., L.N.S., M.C.W.; Visualization: A.B., J.S.C., F.J.E., D.G., N.S., V.Z.; Supervision: A.B.;  
706 Funding Acquisition: A.B.

707

#### 708 **Declaration of Interests**

709 The authors declare no competing interests.

710

#### 711 **Figure Legends**

712

713 **Figure 1. Key miRNA signature as predicted from Bronchial Alveolar Lavage Fluid**  
714 **(BALF) RNA-seq data in patients with COVID-19. A)** Predicted upstream regulators  
715 determined through Ingenuity Pathway Analysis (IPA) consistent with the transcriptional  
716 response from differentially expressed genes (FDR<0.05; outer ring). Eight miRNAs were  
717 among the key regulators in response to COVID-19 (inner ring). **B)** Major biological responses  
718 resulting from dysregulation of this eight miRNA signature drive immune- and inflammatory-  
719 related pathways as well as mitochondrial dysfunction determined through IPA. **C)** Pathway  
720 regulation by miR-2392 from BALF RNA-seq data determined through IPA.

721

722 **Figure 2. Cross-species and viral integration of miR-2392. A)** The conservation of miR-2392  
723 across species determined by UCSC Genome Browser. The boxes (■) represent aligning and  
724 conserved sequence regions. Double horizontal line (=) represents both the genome and query  
725 have unalignable sequence between regions of aligned sequence, a double-sided insertion. Single  
726 lines (-) indicate gaps that are largely due to a deletion in the genome of the first species or an  
727 insertion in the genome of the second species. **B)** The expression of MEG3, the miR-2392 host  
728 gene, in different tissues from healthy patients. **C)** Potential binding sites of miR-2392 visualized  
729 across 300 windows of 100bp length in SARS-CoV-2 genomes (NC045512.2 reference, and  
730 representative genomes for variants and lineages of concern from GISAID). The score in each

731 window is the average of miRanda scores for hits within that 100bp window. Three top hits are  
732 shown explicitly at the bottom of the plot.

733

734 **Figure 3. Gene targets of miR-2392 in COVID-19 patients as well as mitochondrial and**  
735 **inflammatory genes.** Volcano plots showing the differential gene expression analysis from **A)**  
736 nasopharyngeal swab and autopsy COVID-19 patient tissues from the **B)** heart, **C)** kidney, **D)**  
737 liver, **E)** lung, and **F)** lymph node from RNA-seq datasets separated by viral load. **G)** Differential  
738 gene expression analysis for all miR-2392 gene targets significantly expressed in nasopharyngeal  
739 swab and autopsy COVID-19 patient tissues. The heatmaps display the t-score statistics for  
740 comparing viral load vs negative patient sample for all samples. Main gene clusters were  
741 determined through k-mean clustering. Six main gene clusters were determined and ShinyGO  
742 (Ge et al., 2020) was utilized to determine the pathways for each cluster which are displayed on  
743 the top panel of the heatmap. miR-2392 gene targets in for **H)** mitochondrial specific genes or **I)**  
744 inflammatory genes are displayed. Differentially expressed genes are shown with at least one  
745 comparison demonstrating a significant adjusted p-value ( $FDR < 0.05$ ) when comparing COVID-  
746 19 patients (high, medium or low viral loads) to non-infected control patients (none). A heatmap  
747 for the miR-2392 mitochondrial gene targets from the full list of targets determined only from  
748 miRmap is available in **Fig. S1**. A heatmap for the miR-2392 inflammatory gene targets from the  
749 full list of targets determined only from miRmap is available in **Fig. S2**. **J)** Scatter plot of  $\log_2$ -  
750 transformed Fold Changes in RNAs and proteins for miR-2392 targets. The chart shows a set of  
751 genes differentially expressed at the RNA level. Student's t-test, RNA  $p\text{-value} \leq 0.05$ , no  
752 limitation on protein p-value. **K)** Scatter plot of  $\log_2$  transformed medians in RNAs and proteins.  
753 The orange color represents COVID-19 positive samples, grey - COVID-19 negative samples.  
754 Student's t-test is used in Fold Change calculations. The size and the opacity of the point  
755 represent  $\log_2$ -transformed Fold Change at the RNA level. The shape of the point represents  
756 Fold Change direction: circle - positive, triangle - negative. Pearson correlation for COVID-19  
757 positive samples displayed in orange, for COVID-19 negative samples - in grey.

758

759 **Figure 4. Increased miR-2392 expression *in vitro* mimics a COVID-19 disease phenotype.**  
760 **A-F)** Volcano plots for RNA-seq results in cells overexpressing miR-2392. **G-J)** Correlation plot  
761 of RNA-seq between miR-2392 overexpression and related SARS-CoV-2 datasets. The circle  
762 size is proportional to the correlation coefficient. Statistical significance was determined using a  
763 two-tailed Student's t-test \* $p < 0.05$ , \*\* $p < 0.01$ , \*\*\* $p < 0.001$ . **K-O)** Dot plots for statistically  
764 significant gene sets determined by fGSEA. NES, nominal enrichment score. **P)** and **Q)**  
765 Predicted miR-2392 targets by the MIRDIP algorithm that are downregulated in the  
766 overexpression experiments. The putative miR-2392 mRNA targets belonging to the consensus  
767 transcriptomic networks observed in SARS-CoV-2, MERS and Influenza infections of different  
768 human cells are represented in a Venn diagram in the upper part of the panel **P**.

769

770 **Figure 5. Circulating miR-2392 with COVID-19 patients compared to COVID-19 negative**  
771 **patients.** Droplet digital PCR (ddPCR) with specific primer for miR-2392 was performed on  
772 serum, urine, and nasopharyngeal swab samples (including other seasonal coronavirus samples)  
773 from COVID-19 positive and negative patients. The miRNA concentration is reported as

774 copies/5ng RNA. **A)** The levels of miRNA-2392 in all tissues from patients grouped as SARS-  
775 CoV-2 positive (SARS-nCoV-2) or negative (neg). Unadjusted t-tests comparing the SARS-  
776 CoV-2 positive to neg for each tissue are provided and also adjusted statistics comparing the  
777 groups with a mixed model corrected for age and sex is provided. **B)** Receiver Operating  
778 Characteristic (ROC) curve is provided for miR-2392 for each tissue comparing SARS-CoV-2  
779 positive to negative patients. **C)** Comparing specific categories within each tissue type between  
780 COVID-19 positive and negative patients. N = COVID-19 Negative, P = COVID-19 positive,  
781 P<sub>int</sub> = intubated patients, outp = outpatient, ICU = Intensive care unit/inpatient, Cold =  
782 Coronaviruses related to the common cold, NL63 = NL63 coronavirus, and CoV-2 = SARS-  
783 CoV-2. For all plots \* = p < 0.05, \*\* = p < 0.01, and \*\*\* = p < 0.001. We also quantified three  
784 other miRNAs with same patient samples as comparison which were miR-1-3p (**Fig. S3**), miR-  
785 155-5p (**Fig. S4**), and miR-124-3p (**Fig. S5**).

786

787 **Figure 6. Anti-miR-2393 therapeutic mitigation of SARS-CoV-2 infection with *in vitro* and**  
788 ***in vivo* models.** **A)** Schematic of the design for the miR-2392 inhibitor with the FASTmer  
789 platform, the synthesis and formulation of the inhibitor, and the experimental models utilized for  
790 testing the inhibitor. **B) – D)** Anti-miR-2392 FASTmer inhibitor applied to A549 human cells  
791 infected with SARS-CoV-2 and tested for viral viability and cytotoxicity. Viral viability is  
792 inhibited by 100% with near 0% cytotoxicity. **E) – G)** Nonsense FASTmer inhibitor applied to  
793 A549 human cells infected with SARS-CoV-2 and tested for viral viability and cytotoxicity.  
794 Viral viability is inhibited by 50% with near 0% cytotoxicity. **H) – J)** Toxicity and efficacy of  
795 anti-miR-2392 FASTmer inhibitor in an *in vivo* infection hamster model. There were six  
796 treatments groups: SBCov207 by IP injection 24 hours prior to viral inoculation (IP Day -1),  
797 SBCov207 by IP injection 24 hours prior to viral inoculation and 24 hours post-viral challenge  
798 (IP Day -1, +1), SBCov207 by IN injection 24 hours prior viral inoculation (IN Day -1),  
799 SBCov207 by IN injection 24 hours prior viral inoculation and 24 hours post-viral challenge (IN  
800 Day -1, +1), and 100ul of PBS as a control treatment 24 hours prior and post-viral challenge  
801 through IN instillation (PBS IN Day -1, +1). **H)** Weights per day for each of the 5 groups pooled  
802 (n = 6 for days 1 – 3 and n = 3 for days 4 -7), and the maximum percent weight loss, observing  
803 for the two different endpoints. **I)** SARS-CoV-2 assayed by plaque assay on Vero E6 cells from  
804 oropharyngeal swabs collected on days 1, 2 and 3. N=6 for each treatment group. **J)**  
805 Histopathological total score for lung tissues at day 3; anti-miR-2392 treatments have lower  
806 scores than the PBS control. Intranasal (IN), intraperitoneal (IP).

807

808 **Figure 7. Predicted impact of miR-2392 on human disease and the top-20 drug compounds**  
809 **predicted to affect miR-2392 expression through machine learning approach.** **A)** Dot plot of  
810 diseases associated with miR-2392, as predicted from miR-2392 gene targets by miRnet. The  
811 diseases were manually curated to emphasize specific diseases and tissues. The values are plotted  
812 according to p-value, and the size of each dot represents the number of downstream gene targets  
813 for miR-2392 associated with each disease prediction. The specific cancer relationship to miR-  
814 2392 is highlighted in **Fig. S7**, relating miR-2392 expression with patient survival in a pan-  
815 cancer analysis. **B)** Barplot of scores using our matrix completion model to predict small  
816 molecules that affect miRNA expression. Higher scores indicate more predicted associations. **C)**

817 Barplot of the normalized connectivity map (CMAP) scores. We used transcripts induced by  
818 miR-2392 overrepresented genes to query CMAP. Higher negative scores reflect a greater  
819 reversal of the miR-2392 transcriptomic signature. Further details on model statistics and  
820 performance are found in **Figs. S8 – S10**.

821

## 822 **Supplemental Figures and Material**

823

### 824 **The UNC COVID-19 Pathobiology Consortium is comprised of:**

825 Shannon M Wallet<sup>1,2</sup>, Robert Maile<sup>2,3</sup>, Matthew C Wolfgang<sup>2,4</sup>, Robert S Hagan<sup>4,5</sup>, Jason R  
826 Mock<sup>4,5</sup>, Natalie M Bowman<sup>6</sup>, Jose L Torres-Castillo<sup>5</sup>, Miriya K Love<sup>5</sup>, Suzanne L Meinig<sup>4</sup>, Will  
827 Lovell<sup>1</sup>, Colleen Rice<sup>5</sup>, Olivia Mitchem<sup>1</sup>, Dominique Burgess<sup>1</sup>, Jessica Suggs<sup>1</sup>, Jordan Jacobs<sup>3</sup>

828

829 <sup>1</sup>Department of Oral and Craniofacial Health Sciences, UNC Adams School of Dentistry,  
830 University of North Carolina School of Medicine, Chapel Hill, NC, 27599, USA

831 <sup>2</sup>Department of Microbiology & Immunology, University of North Carolina School of Medicine,  
832 Chapel Hill, NC, 27599, USA

833 <sup>3</sup>Department of Surgery, University of North Carolina School of Medicine, Chapel Hill, NC,  
834 27599, USA

835 <sup>4</sup>Marsico Lung Institute, University of North Carolina at Chapel Hill, Chapel Hill, NC, 27599,  
836 USA

837 <sup>5</sup>Division of Pulmonary Diseases and Critical Care Medicine, Department of Medicine,  
838 University of North Carolina, Chapel Hill, NC 27599, USA

839 <sup>6</sup>Division of Infectious Disease, School of Medicine, University of North Carolina, Chapel Hill,  
840 NC, 27599, USA

841

842 **Figure S1. Mitochondrial gene targets of miR-2392 and regulated pathways. Related to**  
843 **Figure 3.** Differential gene expression analysis for all miR-2392 mitochondrial gene targets  
844 significantly expressed in nasopharyngeal swab and autopsy COVID-19 patient tissues. The  
845 heatmaps display the t-score statistics for comparing viral load vs negative patient sample for all  
846 samples. Main gene clusters were determined through k-mean clustering. Nine main gene  
847 clusters were determined and ShinyGO (Ge et al., 2020) was utilized to determine the pathways  
848 for each cluster which are displayed on the top panel of the heatmap. Differentially expressed  
849 genes are shown with at least one comparison demonstrating a significant adjusted p-value  
850 (FDR<0.05) when comparing COVID-19 patients (high, medium or low viral loads) to non-  
851 infected control patients (none). Mir-2392 gene targets only determined from miRmap.

852

853 **Figure S2. Inflammatory gene targets of miR-2392 and regulated pathways. Related to**  
854 **Figure 3.** Differential gene expression analysis for all miR-2392 inflammatory gene targets  
855 significantly expressed in nasopharyngeal swab and autopsy COVID-19 patient tissues. The  
856 heatmaps display the t-score statistics for comparing viral load vs negative patient sample for all  
857 samples. Main gene clusters were determined through k-mean clustering. Eight main gene  
858 clusters were determined and ShinyGO (Ge et al., 2020) was utilized to determine the pathways  
859 for each cluster which are displayed on the top panel of the heatmap. Differentially expressed

860 genes are shown with at least one comparison demonstrating a significant adjusted p-value  
861 (FDR<0.05) when comparing COVID-19 patients (high, medium or low viral loads) to non-  
862 infected control patients (none). Mir-2392 gene targets only determined from miRmap.

863

864 **Figure S3. Circulating miR-1-3p with COVID-19 patients compared to COVID-19 negative**  
865 **patients. Related to Figure 5.** Droplet digital PCR (ddPCR) with specific primer for miR-1-3p  
866 was performed on serum, urine, and nasopharyngeal swab samples (including other seasonal  
867 coronavirus samples) from COVID-19 positive and negative patients. The miRNA concentration  
868 are reported as copies/5ng RNA. **A)** The levels of miRNA-2392 in all tissues from patients  
869 grouped as SARS-CoV-2 positive (SARS-nCoV-2) or negative (neg). Unadjusted t-tests  
870 comparing the SARS-CoV-2 positive to neg for each tissue are provided and also adjusted  
871 statistics comparing the groups with a mixed model corrected for age and sex is provided. **B)**  
872 Receiver Operating Characteristic (ROC) curve is provided for miR-1-3p for each tissue  
873 comparing SARS-CoV-2 positive to negative patients. **C)** Comparing specific categories within  
874 each tissue type between COVID-19 positive and negative patients. N = COVID-19 Negative, P  
875 = COVID-19 positive, P<sub>int</sub> = intubated patients, outp = outpatient, ICU = Intensive care  
876 unit/inpatient, Cold = Coronaviruses related to the common cold, NL63 = NL63 coronavirus, and  
877 CoV-2 = SARS-CoV-2. For all plots \* = p < 0.05, \*\* = p < 0.01, and \*\*\* = p < 0.001.

878

879 **Figure S4. Circulating miR-155-5p with COVID-19 patients compared to COVID-19**  
880 **negative patients. Related to Figure 5.** Droplet digital PCR (ddPCR) with specific primer for  
881 miR-155-5p was performed on serum, urine, and nasopharyngeal swab samples (including other  
882 seasonal coronavirus samples) from COVID-19 positive and negative patients. The miRNA  
883 concentration are reported as copies/5ng RNA. **A)** The levels of miRNA-2392 in all tissues from  
884 patients grouped as SARS-CoV-2 positive (SARS-nCoV-2) or negative (neg). Unadjusted t-tests  
885 comparing the SARS-CoV-2 positive to neg for each tissue are provided and also adjusted  
886 statistics comparing the groups with a mixed model corrected for age and sex is provided. **B)**  
887 Receiver Operating Characteristic (ROC) curve is provided for miR-155-5p for each tissue  
888 comparing SARS-CoV-2 positive to negative patients. **C)** Comparing specific categories within  
889 each tissue type between COVID-19 positive and negative patients. N = COVID-19 Negative, P  
890 = COVID-19 positive, P<sub>int</sub> = intubated patients, outp = outpatient, ICU = Intensive care  
891 unit/inpatient, Cold = Coronaviruses related to the common cold, NL63 = NL63 coronavirus, and  
892 CoV-2 = SARS-CoV-2. For all plots \* = p < 0.05, \*\* = p < 0.01, and \*\*\* = p < 0.001.

893

894 **Figure S5. Circulating miR-124-3p with COVID-19 patients compared to COVID-19**  
895 **negative patients. Related to Figure 5.** Droplet digital PCR (ddPCR) with specific primer for  
896 miR-124-3p was performed on serum, urine, and nasopharyngeal swab samples (including other  
897 seasonal coronavirus samples) from COVID-19 positive and negative patients. The miRNA  
898 concentration are reported as copies/5ng RNA. For miR-124-3p, the copies/5ng were either equal  
899 to 0 or at extremely low levels close to 0 copies/5ng. To try to determine any statistical  
900 differences we categorized the groups as ND = Not Determined which are all 0 values or D =  
901 Determined which are values > 0 for both N = negative (open symbols) and P = COVID-19  
902 positive patients samples (closed symbols). The number of patients for each column is shown

903 above the points. No significant differences were observed for any of the sample for miR-124-  
904 3p.

905

906 **Figure S6. miR-2392 expression pan-cancer survival analysis. Related to Figure 7.** Kaplan  
907 Meier patient survival plots for miR-2392 expression in a pan-cancer analysis was determined  
908 utilizing The Kaplan Meier plotter (Nagy et al., 2021). The plots were separated with the top row  
909 being cancers which patients had significantly poor survival with high expression of miR-2392,  
910 the middle row being cancers which patients had poor survival (but not significant) with high  
911 expression of miR-2392, and the bottom row being cancers which patients had significantly  
912 better survival with high expression of miR-2392.

913

914 **Figure S7. Small molecules-miRNA dataset statistics Related to Figure 7.** (Left) Number of  
915 small molecules associated to miRNAs. (Right) Number of miRNAs associated to small  
916 molecules.

917

918 **Figure S8. Performance of our method at predicting missing small molecule-miRNA**  
919 **interactions. Related to Figure 7.** (Top) The mean value of the Receiver Operating Curve  
920 (ROC) is shown for a ten-fold cross-validation experiment (dark blue). 95% confidence interval  
921 is also shown (light blue). (Bottom) The mean value of the Precision-Recall Curve (PRC) is  
922 shown for a ten-fold cross-validation experiment (dark salmon). 95% confidence interval is also  
923 shown (light salmon).

924

925 **Figure S9. Performance of our method at predicting missing small molecule-miRNA**  
926 **interactions when controlling for data imbalance. Related to Figure 7.** (Top) Area Under the  
927 Receiver Operating Curve (AUROC) was obtained in a ten-fold cross-validation experiment for  
928 varying values of the negative to positive label ratio in the test set. (Bottom) Area Under the  
929 Precision-Recall Curve (AUROC) was obtained in a ten-fold cross-validation experiment for  
930 varying values of the negative to positive label ratio in the test set.

931

932 **Table S1. Annealing temperatures for miRNA primers, related to methods and Figure 5.**  
933 Temperatures used for droplet digital PCR to quantify each miRNA target.

934

935 **STAR Methods**

936

937 **RESOURCE AVAILABILITY**

938 **Lead Contact**

939 Further information and requests for resources and reagents should be directed to and will be  
940 fulfilled by the Lead Contact, Afshin Beheshti ([afshin.beheshti@nasa.gov](mailto:afshin.beheshti@nasa.gov)).

941

942 **Materials Availability**

943 This study did not generate new unique reagents.

944

945 **Data and Code Availability**

946 The published article includes all datasets generated and analyzed during this study.  
947 Processed bulk RNA-seq data is available online (<https://covidgenes.weill.cornell.edu/>). RNA-  
948 Seq alignment script for BALF samples and SHSY-5Y cells studies are attached. Limma script  
949 for SHSY5Y studies is attached.

950

951

## 952 **EXPERIMENTAL MODEL AND SUBJECT DETAILS**

953

### 954 ***Human serum and nasopharyngeal swab sample collection for ddPCR***

955 All plasma and nasal swab samples from those with COVID-19 infection, seasonal  
956 coronavirus infection, and controls were collected from inpatients at the University of Maryland  
957 Medical Center, in Baltimore, USA, between March and May of 2020. Sample collection  
958 obtained through informed consent waiver, which was approved by the University of Maryland,  
959 Baltimore IRB.

960 For serum samples, N=10 samples from COVID-19 intubated patients, COVID-19  
961 outpatients, and COVID-19 negative patients were obtained. An equal distribution of N=5 males  
962 and females were used for each group. Also, an equal age distribution of patients from 27 to 85  
963 years old was utilized for each group.

964 For the nasopharyngeal samples the following patient samples were obtained: N=10 SARS-  
965 CoV-2 positive patients, N=6 common cold coronavirus samples, and N=6 Coronavirus NL63  
966 samples. For the common cold coronavirus samples the breakdown was the following for the  
967 specific viruses: N=2 Coronavirus 229E, Coronavirus HKU1, and N=2 Coronavirus OC43.

968

### 969 ***Human nasopharyngeal swab sample collection for RNA-seq analysis***

970 Patient specimens were processed as described in Butler et al., 2020 (Butler et al., 2021).  
971 Briefly, nasopharyngeal swabs were collected using the BD Universal Viral Transport Media  
972 system (Becton, Dickinson and Company, Franklin Lakes, NJ) from symptomatic patients. Total  
973 Nucleic Acid (TNA) was extracted from using automated nucleic acid extraction on the  
974 QIA Symphony and the DSP Virus/Pathogen Mini Kit (Qiagen).

975

### 976 ***Human autopsy tissue collection for RNA-seq analysis***

977 The full methods of the patient sample collection from the autopsy patients are currently  
978 available in the Park et al. (Park et al., 2021). All autopsies are performed with consent of next of  
979 kin and permission for retention and research use of tissue. Autopsies were performed in a  
980 negative pressure room with protective equipment including N-95 masks; brain and bone were  
981 not obtained for safety reasons. All fresh tissues were procured prior to fixation and directly into  
982 Trizol for downstream RNA extraction. Tissues were collected from lung, liver, lymph nodes,  
983 kidney, and the heart as consent permitted. For GeoMx, RNAscope, trichrome and histology  
984 tissue sections were fixed in 10% neutral buffered formalin for 48 hours before processing and  
985 sectioning. These cases had a post-mortem interval of less than 48 hours. For bulk RNA-seq  
986 tissues, post-mortem intervals ranged from less than 24 hours to 72 hours (with 2 exceptions -  
987 one at 4 and one at 7 days - but passing RNA quality metrics) with an average of 2.5 days. All  
988 deceased patient remains were refrigerated at 4°C prior to autopsy performance.

989

### 990 ***Human urine sample collection***

991 Urine was collected from patients and volunteers at the University of North Carolina at  
992 Chapel Hill. All patients provided informed consent prior to participation in IRB-approved re-  
993 search protocols (UNC IRB: 20-0822 [RHS] and 20-0792 [NMB]). Mid-stream urine of outpa-  
994 tients and non-critically ill patients was collected by the clean catch method. Urine of intubated  
995 critically ill patients was collected from a port on the Foley catheter. Urine was aliquoted into 5  
996 ml aliquots and stored at -80°C.

997 Urine aliquots were thawed, and microRNA was extracted from 1 ml per sample using  
998 Norgen Urine microRNA Purification Kit (Cat. 29000). Microalbumin and creatinine levels were  
999 assessed using Microalbumin 2-1 Combo strips (CLIAwaived Inc, cat# URS-2M).

1000

### 1001 ***Cell lines used for miR-2392 mimic experiments***

1002 Human SH-SY5Y cells were obtained from the ATCC and grown in Minimum Essential  
1003 Medium (Gibco) / 10% FBS (Invitrogen) /1% MEM Non Essential Amino Acids (Gibco) /  
1004 1% GlutaMAX -1 (Gibco). Cells were plated in 3.5 cm dishes and incubated with miR-2392 or  
1005 control lentivirus particles (MOI 1) for 48h. Cells were harvested and lysed in Trizol reagent and  
1006 RNA was extracted following manufacturers protocol (Invitrogen).

1007

### 1008 ***COVID-19 hamster model***

1009 Male Syrian hamsters 6-8 weeks old were utilized for efficacy studies with anti-miR-2392  
1010 FASTmer treatment. Three hamsters were used for each experimental group for a total of 30  
1011 hamsters with 10 treatment groups. Hamsters were infected with  $10^5$  pfu of SARS-CoV-2. There  
1012 were 5 major treatment groups (N=6 per group) with two endpoints at day 3 or 7 post-viral  
1013 challenge (N=3 per endpoint). Groups 1 and 3 were given the FASTmer treatment by IP injection  
1014 while groups 2 and 4 were given by IN instillation under ketamine-xylazine anesthesia. Groups 1  
1015 and 2 were given single FASTmer treatment 24 hours before viral challenge. Groups 3 and 4  
1016 were given two doses of FASTmers at 24 hours before and 24 hours after viral challenge. The  
1017 control group 5 was treated with PBS 24 hours prior to and 24 hours following viral challenge by  
1018 IN instillation.

1019 Treatment efficacy was assessed in multiple ways: 1) Change in daily body weight, 2)  
1020 oropharyngeal shedding of virus on days 1-3 from all groups post-challenge assayed by plaque  
1021 assay on Vero E6 cells (PFU/swab), 3) tissue burden of the virus at necropsy on day 3 from 2  
1022 lung tubes and turbinates assayed by plaque assay (PFU/100mg), and 4) histopathologic scoring  
1023 on lungs and turbinates from all hamsters; the histopathological score for individual tissues,  
1024 inflammation score from the interstitial lung inflammation, and total histopathological  
1025 scores/assessment was made.

1026 The dose of anti-miR-2392 that was used was calculated to raise blood levels to 10  $\mu$ M if it  
1027 were given intravenously. The molecular weight of anti-miR-2392 is 15,804. Assuming that  
1028 hamsters weigh 120 grams and have 8% of body weight as blood, blood volume was  
1029 approximately 0.01 liters. The dose per hamster was 1.58 mg in a 100  $\mu$ l volume from an anti-  
1030 miR-2392 solution.

1031



1032 ***In vitro viral screening model***

1033 A549-ACE2 cells, gifted by Dr. Brad Rosenberg (MSSM), were maintained in DMEM  
1034 (Quality Biological, Gaithersburg, MD; #112-014-101) + 10% Fetal Bovine Serum (Gibco;  
1035 #26140079) + 1% Penicillin-Streptomycin (Gemini Bio; #400-109). The day prior to treatment,  
1036 5,000 A549-ACE2 cells were plated per well in 96-well plates. MiR-2932 was diluted in  
1037 duplicate in A549-ACE2 media to a starting concentration of 20 $\mu$ M (Run 1) or 22 $\mu$ M (Runs 2  
1038 and 3), and then an 8-point 1:2 dilution series was prepared. Media was removed from cells and  
1039 90 $\mu$ L of each dilution was transferred to the cells. The plates were incubated for 2 hours at 37°C  
1040 before being infected with an M.O.I. of 0.1 SARS-CoV-2 WA-1 (provided by Dr. Natalie  
1041 Thornburg at the Centers for Disease Control and Prevention). Parallel plates were also run and  
1042 left uninfected to monitor toxicity. Since Runs 2 and 3 were run simultaneously, a single toxicity  
1043 plate was run for both. All plates were incubated at 37°C for 72 hours before being analyzed via  
1044 Cell Titer Glo (Promega, Madison, WI; #G7573). Cell viability was compared to uninfected,  
1045 untreated cells and infected, untreated cells.

1046

1047 **METHOD DETAILS**

1048

1049 ***miRNA extraction for Droplet Digital PCR (ddPCR)***

1050 MiRNA extractions from serum were carried out using the Qiagen miRNeasy serum/plasma  
1051 kit (#217184). MiRNA extractions from urine samples were carried out using Norgen urine  
1052 microRNA Purification Kit (Cat. 29000, Norgen Bioteck Corp. Thorold, ON, Canada).  
1053 Quantitation of miRNA samples was done using a NanoDrop 2000 Spectrophotometer  
1054 (ThermoFisher Scientific).

1055

1056 ***cDNA generation and ddPCR***

1057 First, cDNA was synthesized from miRNA samples using the Qiagen miRCURY LNA RT  
1058 Kit (Cat. 339340) using a concentration of 5ng/ $\mu$ l for the miRNA per sample. Next, samples  
1059 were mixed with a 1:20 dilution of the generated cDNA with the BioRad QX200 ddPCR  
1060 Evagreen Supermix (Cat. 1864034) and the appropriate miRNA primers from miRCURY LNA  
1061 miRNA PCR Assays (Qiagen). BioRad QX200 Automated Droplet Generator (Cat. 1864101)  
1062 was used to create emulsion droplets. With the C1000 Touch™ Thermal Cycler with 96-Deep  
1063 Well Reaction Module (Bio-Rad) the following PCR reaction was used for all the primers: 1  
1064 cycle 95°C for 5 min, 40 cycles of 95°C for 30 sec and 58°C for 1 min (the annealing  
1065 temperature can change depending on the primer), 1 cycle of 4°C for 5 min, and 1 cycle of 90°C  
1066 for 5 min. Not all miRNA primers sets for ddPCR will have the same annealing temperature, so  
1067 optimizing the annealing temperature is required for each primer set. Their respective annealing  
1068 temperatures are found in **Table S1**. Finally, the QX200™ Droplet Digital™ PCR System (Bio-  
1069 Rad) quantified the amount of miRNA for each primer set per sample. QuantaSoft software (Bio-  
1070 Rad) generated the data for each primer set and sample. The same threshold setting was used for  
1071 all samples per primer set. The concentration (miRNA copies/ $\mu$ l) value generated by QuantaSoft  
1072 was converted to miRNA copies/ng of serum. These values were used for all miRNA analysis.  
1073 For all analysis the miRNA concentrations were  $\log_2(x+1)$  transformed to allow for easy  
1074 comparison between miRNAs and samples.

1075

1076 ***Publicly available Bronchial Alveolar Lavage Fluid (BALF) COVID-19 RNA-sequencing data***

1077 Fastq files were downloaded from SRA (NCBI BioProject PRJNA605907 (Shen et al., 2020)  
1078 and NCBI BioProject PRJNA390194 (Ren et al., 2018)). Fastq data files were trimmed using  
1079 TrimGalore v (0.6.4) with a quality cutoff of 30. Data were then aligned using STAR (v2.7.3)  
1080 two pass mode to the Human reference genome (GRCh38 v99 downloaded 04-27-2020).  
1081 Unaligned data were written to a fastq file, and then realigned to the GRCh38 reference genome  
1082 using Bowtie 2 (v2.3.4.1), and output sam file converted to a bam file using samtools (v1.7). The  
1083 resultant Bam files were merged, sorted, and read groups added using picard tools (v2.21.3)  
1084 (script in supplemental data).

1085

1086 ***Publicly available RNA-seq data: A549, Calu-3, NHBE, and COVID-19 lung biopsy***

1087 Raw RNA-seq read counts from the publication by Blanco-Melo *et al.* for the A549, Calu-3,  
1088 and NHBE cell lines as well as post-mortem lung biopsies from two COVID-19 patients were  
1089 downloaded from the Gene Expression Omnibus (series accession GSE147507) (Blanco-Melo et  
1090 al., 2020).

1091

1092 ***RNA-seq of Nasopharyngeal Swab COVID-19 patient samples***

1093 RNA isolation and library preparation is fully described in Butler, et al. (Butler et al., 2021).  
1094 Briefly, library preparation on the all nasopharyngeal swab samples' total nucleic acid (TNA)  
1095 were treated with DNase 1 (Zymo Research, Catalog # E1010). Post-DNase digested samples  
1096 were then put into the NEBNext rRNA depletion v2 (Human/Mouse/Rat), Ultra II Directional  
1097 RNA (10 $\mu$ g), and Unique Dual Index Primer Pairs were used following the vendor protocols  
1098 from New England Biolabs. Kits were supplied from a single manufacturer lot. Completed  
1099 libraries were quantified by Qubit or equivalent and run on a Bioanalyzer or equivalent for size  
1100 determination. Libraries were pooled and sent to the WCM Genomics Core or HudsonAlpha for  
1101 final quantification by Qubit fluorometer (ThermoFisher Scientific), TapeStation 2200 (Agilent),  
1102 and qRT-PCR using the Kapa Biosystems Illumina library quantification kit.

1103

1104 ***RNA-seq of COVID-19 autopsy tissue samples***

1105 RNA isolation and library preparation is fully described in Park, et al. (Park et al., 2021).  
1106 Briefly, autopsy tissues were collected from lung, liver, lymph nodes, kidney, and the heart and  
1107 were placed directly into Trizol, homogenized and then snap frozen in liquid nitrogen. At least  
1108 after 24 hours these tissue samples were then processed via standard protocols to isolate RNA.  
1109 New York Genome Center RNA sequencing libraries were prepared using the KAPA Hyper  
1110 Library Preparation Kit + RiboErase, HMR (Roche) in accordance with manufacturer's  
1111 recommendations. Briefly, 50-200ng of Total RNA were used for ribosomal depletion and  
1112 fragmentation. Depleted RNA underwent first and second strand cDNA synthesis followed by  
1113 adenylation, and ligation of unique dual indexed adapters. Libraries were amplified using 12  
1114 cycles of PCR and cleaned-up by magnetic bead purification. Final libraries were quantified  
1115 using fluorescent-based assays including PicoGreen (Life Technologies) or Qubit Fluorometer  
1116 (Invitrogen) and Fragment Analyzer (Advanced Analytics) and sequenced on a NovaSeq 6000  
1117 sequencer (v1 chemistry) with 2x150bp targeting 60M reads per sample.

1118

1119 ***miR-2392 mimic experiments in SH-SY5Y cells and RNA-seq***

1120 RNA was dissolved in nuclease free water and concentration determined spectrometrically at  
1121 260nm using a Biotek plate reader (Biotek). 500ng RNA was used as input for a whole  
1122 transcriptome library preparation (ThermoFisher Total RNA). Libraries were quantified using a  
1123 bioanalyzer chip reader (nanoDNA chips: Aglient Technologies) and diluted to 100 pM final  
1124 concentration. Barcoded libraries were combined and use to seed a OneTouch bead templating  
1125 reaction (OneTouch2). Cloned libraries were enriched and loaded on 540 Ion Torrent chips.  
1126 Data were sequenced using the Ion Torrent RNA-seq workflow. Unaligned Bam files were  
1127 converted to fastq and aligned to the Grch 38 reference genome using STAR Two pass approach  
1128 (Dobin paper) to create gene count tables as described in Overbery et al. (Overbey et al., 2021)  
1129 (script in supplementary).

1130

1131 ***Anti-miR-2392 FASTmer inhibitor design and construction***

1132 The FAST (Facile Accelerated Specific Therapeutics) platform was used to design FASTmer  
1133 inhibitors, which are composed of a nanobiohyrd molecule based on antisense peptide nucleic  
1134 acid (PNA) moiety conjugated to nanoparticle for improved delivery and membrane transport.  
1135 The PNA moiety was chosen to be 15 bases long (in order to maximize both solubility and  
1136 specificity), which yielded six potential target sequences within the 20-nucleotide mature human  
1137 miR-2392. These potential targets were screened using FAST for solubility, self-complementing  
1138 sequences, and off-targeting within the human genome (GCF\_000001405.26) and SARS-CoV-2  
1139 viral genome (NC\_045512). The antisense sequence complementing miR-2392 nucleotides 2 to  
1140 16 (TCTCACCCCATCCT) was chosen in order to minimize off-targeting while maximizing  
1141 coverage of the miR-2392 seed region. The FASTmer was synthesized (with an N-terminal  
1142 histidine tag and a 2-(2-(2-aminoethoxy)ethoxy)acetic acid linker) on an Apex 396 peptide  
1143 synthesizer (AAPPTec, LLC) with solid-phase Fmoc chemistry. Fmoc-PNA monomers were  
1144 obtained from PolyOrg Inc., with A, C, and G monomers protected with Bhoc groups. Following  
1145 synthesis, the peptides were conjugated with nanoparticles and purified via size-exclusion  
1146 filtration. Conjugation and concentration of the purified solution was monitored through  
1147 measurement of absorbance at 260 nm (for detection of PNA) and 400 nm (for quantification of  
1148 gold nanoparticles).

1149

1150 **QUANTIFICATION AND STATISTICAL ANALYSIS**

1151

1152 ***Analysis of BALF RNA-seq data***

1153 Bam files were imported into Partek Genome Studio v7.0, and gene expression values  
1154 quantified vs the Grch38 reference annotation guide (Ensembl v99). Samples with fewer than 2  
1155 million aligned reads were excluded from further analysis. Genes with fewer than 10 reads in  
1156 25% of samples were excluded, and differential gene expression determined using ANOVA with  
1157 infection status as contrast. Differentially expressed gene files were used in GSEA and IPA to  
1158 determine biological significance and pathways being regulated.

1159

1160 ***Analysis of Nasopharyngeal Swab RNA-seq data***

1161 The nasopharyngeal swab samples were analyzed comparing COVID-19 viral infection to  
1162 the negative patients and was as previously described in Butler et al. (Butler et al., 2021) and the  
1163 DESeq2 (Love et al., 2014) was utilized to generate the differential expression data. Heatmaps  
1164 were displayed using pheatmap (Kolde, 2015). Volcano plots were made use R program  
1165 EnhancedVolcano (Blighe et al., 2018).

1166

#### 1167 *Analysis of Autopsy RNA-seq data*

1168 The full methods of the analysis from the autopsy patients is currently available in the Park et  
1169 al. (Park et al., 2021). Briefly, RNA-seq data was processed through the nf-core/rnaseq pipeline  
1170 (Ewels et al., 2020). This workflow involved adapter trimming using Trim Galore!  
1171 (<https://github.com/FelixKrueger/TrimGalore>), read alignment with STAR (Dobin et al., 2013),  
1172 gene quantification with Salmon (Patro et al., 2017), duplicate read marking with Picard  
1173 MarkDuplicates (<https://github.com/broadinstitute/picard>), and transcript quantification with  
1174 StringTie (Kovaka et al., 2019). Other quality control measures included RSeQC, Qualimap, and  
1175 dupRadar. Alignment was performed using the GRCh38 build native to nf-core and annotation  
1176 was performed using Gencode Human Release 33 (GRCH38.p13). FeatureCounts reads were  
1177 normalized using variance-stabilizing transform (vst) in DESeq2 package in R for visualization  
1178 purposes in log-scale (Love et al., 2014). Differential expression of genes were calculated by  
1179 DESeq2. Differential expression comparisons were done as either COVID+ cases versus  
1180 COVID- controls for each tissue specifically, correcting for sequencing batches with a covariate  
1181 where applicable, or pairwise comparison of viral levels from the lung as determined by  
1182 nCounter data. Volcano plots were made use R program EnhancedVolcano (Blighe et al., 2018).

1183

#### 1184 *Analysis Combining Autopsy and Nasopharyngeal Swab RNA-seq data*

1185 To combine the results from the autopsy and nasopharyngeal swab RNA-seq data, we utilized  
1186 the t-score values from the DESeq2 analysis. Heatmaps were displayed using pheatmap (Kolde,  
1187 2015).

1188

#### 1189 *Gene Set Enrichment Analysis (GSEA)*

1190 For pathway analysis on the miR-2392 targets (**Fig. 3**) we utilized ShinyGO (Ge et al., 2020)  
1191 to determine the significantly regulated pathways for each main cluster in the heatmap. The  
1192 clustering was determined through k-mean statistics.

1193 For pathway analysis on the miR-2392 mimic RNA-seq data, we utilized fast Gene Set  
1194 Enrichment Analysis (fgSEA) (Korotkevich et al., 2021). Pathway analysis was done comparing  
1195 miR-2392 mimics to all controls and the ranked list of genes were defined by the t-score  
1196 statistics. The statistical significance was determined by 1000 permutations of the genesets  
1197 (Subramanian et al., 2005).

1198

#### 1199 *Analysis of proteomic and transcriptomic blood datasets from COVID-19 patients*

1200 For the analysis of the miR-2392 targets in the blood tissue, we downloaded whole blood  
1201 transcriptome data and plasma proteome data from The COVIDome Explorer Researcher Portal  
1202 (Sullivan et al., 2021). For Transcriptome data we used the following filters: Category "Effect of  
1203 COVID-19 status", Platform "Blood", Statistical test "Student's t-test", Adjustment method

1204 "none", Sex "male" and "female", Age Group "All". For Proteome data we used the following  
1205 filters: Category "Effect of COVID-19 status", Platform "SOMAscan", Statistical test "Student's  
1206 t-test", Adjustment method "none", Sex "male" and "female", Age Group "All". We created the  
1207 list of the intersecting genes from both datasets. We analyzed the list using RStudio Desktop  
1208 1.3.1093 (RStudio Team (2020). RStudio: Integrated Development Environment for R. RStudio,  
1209 PBC, Boston, MA URL <http://www.rstudio.com/>), and visualized data using ggplot2 version  
1210 3.3.2 (Wickham, 2016) and ggrepel version 0.8.2 (<https://ggrepel.slowkow.com/>).

1211

### 1212 ***Analysis of Monocyte RNA-seq data***

1213 The monocyte COVID-19 RNA-Seq data, published under the accession GSE159678  
1214 (Rother et al., 2020), was downloaded from SRA and gene expression was quantified using  
1215 Salmon's selective alignment approach (Srivastava et al., 2020). The RNA-Seq processing  
1216 pipeline was implemented using pyrpipe (Singh et al., 2021) ([https://github.com/urmi-21/pyrpipe/tree/master/case\\_studies/Covid\\_RNA-Seq](https://github.com/urmi-21/pyrpipe/tree/master/case_studies/Covid_RNA-Seq)). Exploratory data analysis and differential  
1217 expression analysis were performed using MetaOmGraph (Singh et al., 2020).

1218

### 1220 ***Analysis of A549, Calu-3, NHBE, and COVID lung biopsy data***

1221 Each data series was normalized and filtered for low-expressed genes (counts<1). Cell  
1222 culture samples treated with SARS-CoV-2 were compared to untreated controls and COVID-19-  
1223 positive patient samples were compared to healthy lung biopsies. Differentially expressed genes  
1224 were determined from the R-program Limma-Voom (Ritchie et al., 2015) using a linear model  
1225 with weighted least squares for each gene and the false discovery rate adjusted p-values were  
1226 calculated.

1227

### 1228 ***Analysis of miR-2392 mimic RNA-seq data***

1229 Differential gene expression was determined using LIMMA-voom (Ritchie et al., 2015).  
1230 Data were filtered to ensure data contained at least 5 million aligned reads, and average gene  
1231 counts of > 10. Cell treatments we used as contrasts for differentially expressed gene  
1232 calculations. These results were then uploaded to GSEA for further analysis. (R script in  
1233 supplementary section)

1234

### 1235 ***Conservation of miR-2392 between species***

1236 To determine conservation of miR-2392 among different species we utilized UCSC  
1237 Genome Browser (Kent et al., 2002). Hsa-miR-2392 was entered as an input and a select of  
1238 species was used to compare which included common species that are currently used in SARS-  
1239 CoV-2 *in vivo* studies (i.e. mice, ferrets, and hamsters). We also chose primates and other  
1240 animals to provide a wide spectrum of species to observe conservation of miR-2392. Lastly, the  
1241 UCSC Genome Browser provides the host gene for miR-2392 (i.e. MEG3) and redirects to GTEx  
1242 (Consortium, 2020) to provide a plot of MEG3 levels based on RNA-seq data on normal tissues.

1243

### 1244 ***Mapping miR-2392 sequence to SARS-CoV-2 sequences***

1245 To explore potential binding sites for miR-2392 we used miRanda software (Enright et al.,  
1246 2003) to identify all potential binding sites with respect to the SARS-CoV-2 reference genome

1247 (Wuhan-Hu-1; NC045512.2) and representative genomes from lineages of concern. The lineages  
1248 of concern were selected from Global Initiative on Sharing All Influenza Data (GISAID) with  
1249 each lineage being represented by 14 recent genomes.

1250

### 1251 *In silico predictions of genes from miRNAs*

1252 Through the use of a Cytoscape (Shannon et al., 2003) plug-in called ClueGo/CluePedia  
1253 (Bindea et al., 2013), we were able to predict genes targeted by the miRNAs determined. This  
1254 involved entering all miRNAs in ClueGo and allowing the software to determine the top 50  
1255 genes that were significantly regulated and connected to the miRNAs. The predictions only  
1256 reflect the functions that will be regulated by the miRNAs and do not show whether the function  
1257 will be activated or inhibited. Lastly, miRNet 2.0 was utilized to predict the diseases and  
1258 pathways that are associated with the miRNAs (Chang et al., 2020a). This was plotted as a dot  
1259 utilizing the R-program ggplot2 (v3.2.1) (Wickham, 2016).

1260

### 1261 *ddPCR analysis of miRNA levels in patient samples*

1262 First, we normalized the amount of each miRNA measured per body location (nasal, serum,  
1263 and urine) using the general logarithm transformation. We compared miRNA levels in samples  
1264 from patients either positive or negative for SARS-nCoV-2 using the student's t-test (unadjusted)  
1265 as well as controlling for sex and age using least squares adjustment. Next, we generated receiver  
1266 operating characteristic curves from each body location to show the performance of a  
1267 classification model (SARS-nCoV-2 positive versus negative) at all classification thresholds  
1268 using the absolute, non-transformed levels (miRNA copies per 5 ng RNA). Finally, we  
1269 performed a subanalysis on each location to compare the variance of each miRNA in SARS-  
1270 nCoV-2 negative patients compared to other patient groups. For serum and nasal samples, 1-way  
1271 ANOVA was used to identify variation associated with the patient classification. For urine  
1272 samples, 2-way ANOVA was used with location (outpatient versus inpatient) and SARS-nCoV-2  
1273 positivity as the main factors. If the ANOVA yielded a  $P < 0.05$ , Dunnett's post-test was used to  
1274 compare subgroup means to the negative patient sample mean.

1275

### 1276 *Computational drug repositioning model*

1277 Using the SM2miR database (Liu et al., 2013), we assembled an  $n \times m$  binary matrix ( $X$ )  
1278 containing 3,593 associations between small molecules ( $n = 213$ , rows) and miRNAs ( $m =$   
1279  $1,519$ , columns). Each matrix entry ( $X_{ij}$ ) was assigned a value of 1 where a small molecule is  
1280 known to be associated to miRNA, and was 0 otherwise. The chemical notation as a simplified  
1281 molecular input line entry system (SMILES) was obtained for each small molecule from  
1282 PubChem. We then calculated the 2D Tanimoto chemical similarity between pairs of small  
1283 molecules using the MACCS key binary fingerprints with RDKit (RDKit: Open-source  
1284 cheminformatics; <http://www.rdkit.org>). Similarly, for each miRNA, we obtained its sequence  
1285 from miRbase (Kozomara et al., 2019) and computed sequence similarity between miRNAs as  
1286 the score of their Needleman-Wunsch alignment. We used the binary matrix, together with the  
1287 chemical and sequence similarities, as input to our state-of-the-art drug target prediction model  
1288 to predict missing associations in  $X$  (Galeano et al., 2021). The model parameters where:  $p = \frac{1}{2}$ ,

1289  $\beta_{\text{Chem}} = 1$ , and  $\alpha_{\text{seq}} = 0$ . To assess the prediction performance of the model, we performed ten-  
1290 fold cross-validation simulations.

1291

## 1292 **References**

1293 Allegra, L., Dal Sasso, M., Bovio, C., Massoni, C., Fonti, E., and Braga, P.C. (2002). Human  
1294 neutrophil oxidative bursts and their in vitro modulation by different N-acetylcysteine  
1295 concentrations. *Arzneimittelforschung* 52, 669-676.

1296 Ardestani, A., and Azizi, Z. (2021). Targeting glucose metabolism for treatment of COVID-19.  
1297 *Signal Transduct Target Ther* 6, 112.

1298 Asai, A., Konno, M., Ozaki, M., Otsuka, C., Vecchione, A., Arai, T., Kitagawa, T., Ofusa, K.,  
1299 Yabumoto, M., Hirotsu, T., *et al.* (2020). COVID-19 Drug Discovery Using Intensive  
1300 Approaches. *Int J Mol Sci* 21.

1301 Aunins, T.R., Erickson, K.E., and Chatterjee, A. (2020). Transcriptome-based design of  
1302 antisense inhibitors potentiates carbapenem efficacy in CRE *Escherichia coli*. *Proc Natl Acad Sci*  
1303 *U S A* 117, 30699-30709.

1304 Aykin-Burns, N., Franklin, E.A., and Ercal, N. (2005). Effects of N-acetylcysteine on lead-  
1305 exposed PC-12 cells. *Arch Environ Contam Toxicol* 49, 119-123.

1306 Baden, L.R., El Sahly, H.M., Essink, B., Kotloff, K., Frey, S., Novak, R., Diemert, D., Spector,  
1307 S.A., Rouphael, N., Creech, C.B., *et al.* (2021). Efficacy and Safety of the mRNA-1273 SARS-  
1308 CoV-2 Vaccine. *N Engl J Med* 384, 403-416.

1309 Bartoszewski, R., Dabrowski, M., Jakiela, B., Matalon, S., Harrod, K.S., Sanak, M., and  
1310 Collawn, J.F. (2020). SARS-CoV-2 may regulate cellular responses through depletion of specific  
1311 host miRNAs. *Am J Physiol Lung Cell Mol Physiol* 319, L444-L455.

1312 Bindea, G., Galon, J., and Mlecnik, B. (2013). CluePedia Cytoscape plugin: pathway insights  
1313 using integrated experimental and in silico data. *Bioinformatics* 29, 661-663.

1314 Bindea, G., Mlecnik, B., Hackl, H., Charoentong, P., Tosolini, M., Kirilovsky, A., Fridman,  
1315 W.H., Pages, F., Trajanoski, Z., and Galon, J. (2009). ClueGO: a Cytoscape plug-in to decipher  
1316 functionally grouped gene ontology and pathway annotation networks. *Bioinformatics* 25, 1091-  
1317 1093.

1318 Blanco-Melo, D., Nilsson-Payant, B.E., Liu, W.C., Uhl, S., Hoagland, D., Moller, R., Jordan,  
1319 T.X., Oishi, K., Panis, M., Sachs, D., *et al.* (2020). Imbalanced Host Response to SARS-CoV-2  
1320 Drives Development of COVID-19. *Cell* 181, 1036-1045 e1039.

1321 Blighe, K., Rana, S., and Lewis, M. (2018). EnhancedVolcano: Publication-ready volcano plots  
1322 with enhanced colouring and labeling. <https://github.com/kevinblighe/EnhancedVolcano>.

1323 Butler, D., Mozsary, C., Meydan, C., Foox, J., Rosiene, J., Shaiber, A., Danko, D., Afshinnkoo,  
1324 E., MacKay, M., Sedlazeck, F.J., *et al.* (2021). Shotgun transcriptome, spatial omics, and  
1325 isothermal profiling of SARS-CoV-2 infection reveals unique host responses, viral  
1326 diversification, and drug interactions. *Nat Commun* 12, 1660.

1327 Carboni, E., Carta, A.R., and Carboni, E. (2020). Can pioglitazone be potentially useful  
1328 therapeutically in treating patients with COVID-19? *Med Hypotheses* 140, 109776.

- 1329 Carfi, A., Bernabei, R., Landi, F., and Gemelli Against, C.-P.-A.C.S.G. (2020). Persistent  
1330 Symptoms in Patients After Acute COVID-19. *JAMA* 324, 603-605.
- 1331 Carrico, C., Meyer, J.G., He, W., Gibson, B.W., and Verdin, E. (2018). The Mitochondrial  
1332 Acylome Emerges: Proteomics, Regulation by Sirtuins, and Metabolic and Disease Implications.  
1333 *Cell Metab* 27, 497-512.
- 1334 Centa, A., Fonseca, A.S., Ferreira, S., Azevedo, M.L.V., Vaz de Paula, C.B., Nagashima, S.,  
1335 Machado-Souza, C., Miggiolaro, A., Baena, C.P., de Noronha, L., *et al.* (2020). Deregulated  
1336 miRNA expression is associated with endothelial dysfunction in post-mortem lung biopsies of  
1337 COVID-19 patients. *Am J Physiol Lung Cell Mol Physiol*.
- 1338 Chang, L., Zhou, G., Soufan, O., and Xia, J. (2020a). miRNet 2.0: network-based visual  
1339 analytics for miRNA functional analysis and systems biology. *Nucleic Acids Res*.
- 1340 Chang, L., Zhou, G., Soufan, O., and Xia, J. (2020b). miRNet 2.0: network-based visual  
1341 analytics for miRNA functional analysis and systems biology. *Nucleic Acids Res* 48, W244-  
1342 W251.
- 1343 Chen, J., Yao, D., Li, Y., Chen, H., He, C., Ding, N., Lu, Y., Ou, T., Zhao, S., Li, L., *et al.*  
1344 (2013). Serum microRNA expression levels can predict lymph node metastasis in patients with  
1345 early-stage cervical squamous cell carcinoma. *Int J Mol Med* 32, 557-567.
- 1346 Chen, Y., and Wang, X. (2020). miRDB: an online database for prediction of functional  
1347 microRNA targets. *Nucleic Acids Res* 48, D127-D131.
- 1348 Condorelli, G., Latronico, M.V., and Dorn, G.W., 2nd (2010). microRNAs in heart disease:  
1349 putative novel therapeutic targets? *Eur Heart J* 31, 649-658.
- 1350 Consortium, G.T. (2020). The GTEx Consortium atlas of genetic regulatory effects across human  
1351 tissues. *Science* 369, 1318-1330.
- 1352 Dickey, L.L., Worne, C.L., Glover, J.L., Lane, T.E., and O'Connell, R.M. (2016). MicroRNA-  
1353 155 enhances T cell trafficking and antiviral effector function in a model of coronavirus-induced  
1354 neurologic disease. *J Neuroinflammation* 13, 240.
- 1355 Dobin, A., Davis, C.A., Schlesinger, F., Drenkow, J., Zaleski, C., Jha, S., Batut, P., Chaisson,  
1356 M., and Gingeras, T.R. (2013). STAR: ultrafast universal RNA-seq aligner. *Bioinformatics* 29,  
1357 15-21.
- 1358 Dweep, H., and Gretz, N. (2015). miRWalk2.0: a comprehensive atlas of microRNA-target  
1359 interactions. *Nat Methods* 12, 697.
- 1360 Edmonds, C.E., Zuckerman, S.P., and Conant, E.F. (2021). Management of Unilateral Axillary  
1361 Lymphadenopathy Detected on Breast MRI in the Era of Coronavirus Disease (COVID-19)  
1362 Vaccination. *AJR Am J Roentgenol*.
- 1363 Eller, K.A., Aunins, T.R., Courtney, C.M., Campos, J.K., Otoupal, P.B., Erickson, K.E.,  
1364 Madinger, N.E., and Chatterjee, A. (2021). Facile accelerated specific therapeutic (FAST)  
1365 platform develops antisense therapies to counter multidrug-resistant bacteria. *Commun Biol* 4,  
1366 331.
- 1367 Enomoto, Y., Takagi, R., Naito, Y., Kiniwa, T., Tanaka, Y., Hamada-Tsutsumi, S., Kawano, M.,  
1368 Matsushita, S., Ochiya, T., and Miyajima, A. (2017). Identification of the novel 3' UTR  
1369 sequences of human IL-21 mRNA as potential targets of miRNAs. *Sci Rep* 7, 7780.



- 1370 Enright, A.J., John, B., Gaul, U., Tuschl, T., Sander, C., and Marks, D.S. (2003). MicroRNA  
1371 targets in *Drosophila*. *Genome Biol* 5, R1.
- 1372 Ewels, P.A., Peltzer, A., Fillinger, S., Patel, H., Alneberg, J., Wilm, A., Garcia, M.U., Di  
1373 Tommaso, P., and Nahnsen, S. (2020). The nf-core framework for community-curated  
1374 bioinformatics pipelines. *Nat Biotechnol* 38, 276-278.
- 1375 Fan, S., Tian, T., Chen, W., Lv, X., Lei, X., Zhang, H., Sun, S., Cai, L., Pan, G., He, L., *et al.*  
1376 (2019). Mitochondrial miRNA Determines Chemoresistance by Reprogramming Metabolism  
1377 and Regulating Mitochondrial Transcription. *Cancer research* 79, 1069-1084.
- 1378 Feng, L., Yin, Y.Y., Liu, C.H., Xu, K.R., Li, Q.R., Wu, J.R., and Zeng, R. (2020). Proteome-  
1379 wide Data Analysis Reveals Tissue-specific Network Associated with SARS-CoV-2 Infection. *J*  
1380 *Mol Cell Biol*.
- 1381 Friedman, R.C., Farh, K.K., Burge, C.B., and Bartel, D.P. (2009). Most mammalian mRNAs are  
1382 conserved targets of microRNAs. *Genome Res* 19, 92-105.
- 1383 Galeano, D., Noto, S., Jimenez, R., and Paccanaro, A. (2021). Interpretable Drug Target  
1384 Predictions using Self-Expressiveness. *bioRxiv*, 2021.2003.2001.433365.
- 1385 Ge, S.X., Jung, D., and Yao, R. (2020). ShinyGO: a graphical gene-set enrichment tool for  
1386 animals and plants. *Bioinformatics* 36, 2628-2629.
- 1387 Gharebaghi, R., Heidary, F., Moradi, M., and Parvizi, M. (2020). Metronidazole; a Potential  
1388 Novel Addition to the COVID-19 Treatment Regimen. *Arch Acad Emerg Med* 8, e40.
- 1389 Griffin, R.J., Monzen, H., Williams, B.W., Park, H., Lee, S.H., and Song, C.W. (2003). Arsenic  
1390 trioxide induces selective tumour vascular damage via oxidative stress and increases  
1391 thermosensitivity of tumours. *Int J Hyperthermia* 19, 575-589.
- 1392 Gudbjartsson, D.F., Norddahl, G.L., Melsted, P., Gunnarsdottir, K., Holm, H., Eythorsson, E.,  
1393 Arnthorsson, A.O., Helgason, D., Bjarnadottir, K., Ingvarsson, R.F., *et al.* (2020). Humoral  
1394 Immune Response to SARS-CoV-2 in Iceland. *N Engl J Med* 383, 1724-1734.
- 1395 Gupta, A., Madhavan, M.V., Sehgal, K., Nair, N., Mahajan, S., Sehrawat, T.S., Bikdeli, B.,  
1396 Ahluwalia, N., Ausiello, J.C., Wan, E.Y., *et al.* (2020). Extrapulmonary manifestations of  
1397 COVID-19. *Nat Med* 26, 1017-1032.
- 1398 Hemmat, N., Asadzadeh, Z., Ahangar, N.K., Alemohammad, H., Najafzadeh, B., Derakhshani,  
1399 A., Baghbanzadeh, A., Baghi, H.B., Javadrashid, D., Najafi, S., *et al.* (2021). The roles of  
1400 signaling pathways in SARS-CoV-2 infection; lessons learned from SARS-CoV and MERS-  
1401 CoV. *Archives of Virology* 166, 675-696.
- 1402 Herrmann, J., Mori, V., Bates, J.H.T., and Suki, B. (2020). Modeling lung perfusion  
1403 abnormalities to explain early COVID-19 hypoxemia. *Nat Commun* 11, 4883.
- 1404 Ho, W.Z., and Douglas, S.D. (1992). Glutathione and N-acetylcysteine suppression of human  
1405 immunodeficiency virus replication in human monocyte/macrophages in vitro. *AIDS Res Hum*  
1406 *Retroviruses* 8, 1249-1253.
- 1407 Hou, X., Liang, Y., Chen, J., Wei, Y., Zeng, P., Wang, L., Lu, C., and Diao, H. (2017).  
1408 Expression Profiling of Cellular MicroRNA in Asymptomatic HBsAg Carriers and Chronic  
1409 Hepatitis B Patients. *Biomed Res Int* 2017, 6484835.

- 1410 Hou, Z., Fan, F., and Liu, P. (2019). BTXA regulates the epithelial-mesenchymal transition and  
1411 autophagy of keloid fibroblasts via modulating miR-1587/miR-2392 targeted ZEB2. *Biosci Rep*  
1412 39.
- 1413 Hu, H.M., Chen, Y., Liu, L., Zhang, C.G., Wang, W., Gong, K., Huang, Z., Guo, M.X., Li,  
1414 W.X., and Li, W. (2013). C1orf61 acts as a tumor activator in human hepatocellular carcinoma  
1415 and is associated with tumorigenesis and metastasis. *FASEB J* 27, 163-173.
- 1416 Hu, S., Li, Z., Lan, Y., Guan, J., Zhao, K., Chu, D., Fan, G., Guo, Y., Gao, F., and He, W.  
1417 (2020). MiR-10a-5p-Mediated Syndecan 1 Suppression Restricts Porcine Hemagglutinating  
1418 Encephalomyelitis Virus Replication. *Front Microbiol* 11, 105.
- 1419 Huang, C., Wang, Y., Li, X., Ren, L., Zhao, J., Hu, Y., Zhang, L., Fan, G., Xu, J., Gu, X., *et al.*  
1420 (2020). Clinical features of patients infected with 2019 novel coronavirus in Wuhan, China.  
1421 *Lancet* 395, 497-506.
- 1422 Hultstrom, M., Lipcsey, M., Wallin, E., Larsson, I.M., Larsson, A., and Frithiof, R. (2021).  
1423 Severe acute kidney injury associated with progression of chronic kidney disease after critical  
1424 COVID-19. *Crit Care* 25, 37.
- 1425 Ibrahim, H., Perl, A., Smith, D., Lewis, T., Kon, Z., Goldenberg, R., Yarta, K., Staniloae, C., and  
1426 Williams, M. (2020). Therapeutic blockade of inflammation in severe COVID-19 infection with  
1427 intravenous N-acetylcysteine. *Clin Immunol* 219, 108544.
- 1428 Islam, M.S., and Islam, A.B.M.M.K. (2021). Viral miRNAs confer survival in host cells by  
1429 targeting apoptosis related host genes. *Informatics in Medicine Unlocked* 22, 100501.
- 1430 Jacobs, L.G., Gourni Paleoudis, E., Lesky-Di Bari, D., Nyirenda, T., Friedman, T., Gupta, A.,  
1431 Rasouli, L., Zetkusic, M., Balani, B., Ogedegbe, C., *et al.* (2020). Persistence of symptoms and  
1432 quality of life at 35 days after hospitalization for COVID-19 infection. *PLoS One* 15, e0243882.
- 1433 Janssen, H.L., Reesink, H.W., Lawitz, E.J., Zeuzem, S., Rodriguez-Torres, M., Patel, K., van der  
1434 Meer, A.J., Patick, A.K., Chen, A., Zhou, Y., *et al.* (2013). Treatment of HCV infection by  
1435 targeting microRNA. *N Engl J Med* 368, 1685-1694.
- 1436 Jia, D., Koonce, N.A., Griffin, R.J., Jackson, C., and Corry, P.M. (2010). Prevention and  
1437 mitigation of acute death of mice after abdominal irradiation by the antioxidant N-acetyl-cysteine  
1438 (NAC). *Radiat Res* 173, 579-589.
- 1439 Jiang, Q., Wang, Y., Hao, Y., Juan, L., Teng, M., Zhang, X., Li, M., Wang, G., and Liu, Y.  
1440 (2009). miR2Disease: a manually curated database for microRNA deregulation in human  
1441 disease. *Nucleic Acids Res* 37, D98-104.
- 1442 Jima, D.D., Zhang, J., Jacobs, C., Richards, K.L., Dunphy, C.H., Choi, W.W., Au, W.Y.,  
1443 Srivastava, G., Czader, M.B., Rizzieri, D.A., *et al.* (2010). Deep sequencing of the small RNA  
1444 transcriptome of normal and malignant human B cells identifies hundreds of novel microRNAs.  
1445 *Blood* 116, e118-127.
- 1446 Johansen, M.D., Irving, A., Montagutelli, X., Tate, M.D., Rudloff, I., Nold, M.F., Hansbro, N.G.,  
1447 Kim, R.Y., Donovan, C., Liu, G., *et al.* (2020). Animal and translational models of SARS-CoV-2  
1448 infection and COVID-19. *Mucosal Immunol* 13, 877-891.
- 1449 Jopling, C.L., Yi, M., Lancaster, A.M., Lemon, S.M., and Sarnow, P. (2005). Modulation of  
1450 hepatitis C virus RNA abundance by a liver-specific MicroRNA. *Science* 309, 1577-1581.

- 1451 Kent, W.J., Sugnet, C.W., Furey, T.S., Roskin, K.M., Pringle, T.H., Zahler, A.M., and Haussler,  
1452 D. (2002). The human genome browser at UCSC. *Genome Res* *12*, 996-1006.
- 1453 Kharazmi, A., Nielsen, H., and Schiotz, P.O. (1988). N-acetylcysteine inhibits human neutrophil  
1454 and monocyte chemotaxis and oxidative metabolism. *Int J Immunopharmacol* *10*, 39-46.
- 1455 Kolde, R. (2015). pheatmap: Pretty heatmaps [Software].
- 1456 Korotkevich, G., Sukhov, V., Budin, N., Shpak, B., Artyomov, M.N., and Sergushichev, A.  
1457 (2021). Fast gene set enrichment analysis. bioRxiv, 060012.
- 1458 Koumpa, F.S., Forde, C.T., and Manjaly, J.G. (2020). Sudden irreversible hearing loss post  
1459 COVID-19. *BMJ Case Rep* *13*.
- 1460 Kovaka, S., Zimin, A.V., Pertea, G.M., Razaghi, R., Salzberg, S.L., and Pertea, M. (2019).  
1461 Transcriptome assembly from long-read RNA-seq alignments with StringTie2. *Genome Biol* *20*,  
1462 278.
- 1463 Kozomara, A., Birgaoanu, M., and Griffiths-Jones, S. (2019). miRBase: from microRNA  
1464 sequences to function. *Nucleic Acids Res* *47*, D155-D162.
- 1465 Krajewski, P.K., Maj, J., and Szepietowski, J.C. (2021). Cutaneous Hyperaesthesia in SARS-  
1466 CoV-2 Infection: Rare but not Unique Clinical Manifestation. *Acta Derm Venereol* *101*,  
1467 adv00366.
- 1468 Lamb, J., Crawford, E.D., Peck, D., Modell, J.W., Blat, I.C., Wrobel, M.J., Lerner, J., Brunet,  
1469 J.P., Subramanian, A., Ross, K.N., *et al.* (2006). The Connectivity Map: using gene-expression  
1470 signatures to connect small molecules, genes, and disease. *Science* *313*, 1929-1935.
- 1471 Lawrie, C.H., Gal, S., Dunlop, H.M., Pushkaran, B., Liggins, A.P., Pulford, K., Banham, A.H.,  
1472 Pezzella, F., Boulwood, J., Wainscoat, J.S., *et al.* (2008). Detection of elevated levels of tumour-  
1473 associated microRNAs in serum of patients with diffuse large B-cell lymphoma. *Br J Haematol*  
1474 *141*, 672-675.
- 1475 Ledford, H. (2020). Coronavirus breakthrough: dexamethasone is first drug shown to save lives.  
1476 *Nature* *582*, 469.
- 1477 Li, J., Li, T., Lu, Y., Shen, G., Guo, H., Wu, J., Lei, C., Du, F., Zhou, F., Zhao, X., *et al.* (2017).  
1478 MiR-2392 suppresses metastasis and epithelial-mesenchymal transition by targeting MAML3  
1479 and WHSC1 in gastric cancer. *FASEB J* *31*, 3774-3786.
- 1480 Li, K., Chen, G., Hou, H., Liao, Q., Chen, J., Bai, H., Lee, S., Wang, C., Li, H., Cheng, L., *et al.*  
1481 (2021). Analysis of sex hormones and menstruation in COVID-19 women of child-bearing age.  
1482 *Reprod Biomed Online* *42*, 260-267.
- 1483 Liu, X., Wang, S., Meng, F., Wang, J., Zhang, Y., Dai, E., Yu, X., Li, X., and Jiang, W. (2013).  
1484 SM2miR: a database of the experimentally validated small molecules' effects on microRNA  
1485 expression. *Bioinformatics* *29*, 409-411.
- 1486 Lott, M.T., Leipzig, J.N., Derbeneva, O., Xie, H.M., Chalkia, D., Sarmady, M., Procaccio, V.,  
1487 and Wallace, D.C. (2013). mtDNA Variation and Analysis Using Mitomap and Mitomaster. *Curr*  
1488 *Protoc Bioinformatics* *44*, 1 23 21-26.
- 1489 Love, M.I., Huber, W., and Anders, S. (2014). Moderated estimation of fold change and  
1490 dispersion for RNA-seq data with DESeq2. *Genome Biol* *15*, 550.

- 1491 Loza, M.J., McCall, C.E., Li, L., Isaacs, W.B., Xu, J., and Chang, B.L. (2007). Assembly of  
1492 inflammation-related genes for pathway-focused genetic analysis. *PLoS One* 2, e1035.
- 1493 Ma, Y., Wang, C., Xue, M., Fu, F., Zhang, X., Li, L., Yin, L., Xu, W., Feng, L., and Liu, P.  
1494 (2018). The Coronavirus Transmissible Gastroenteritis Virus Evades the Type I Interferon  
1495 Response through IRE1alpha-Mediated Manipulation of the MicroRNA miR-30a-5p/SOCS1/3  
1496 Axis. *J Virol* 92.
- 1497 Mahajan, A., and Mason, G.F. (2021). A sobering addition to the literature on COVID-19 and  
1498 the brain. *J Clin Invest*.
- 1499 Malik, Z.R., Razaq, Z., Siff, M., and Sheikh, S. (2020). COVID-19 Presenting as Banti's  
1500 Syndrome. *Cureus* 12, e9096.
- 1501 Mishra, P.K., Tandon, R., and Byrareddy, S.N. (2020). Diabetes and COVID-19 risk: an miRNA  
1502 perspective. *Am J Physiol Heart Circ Physiol* 319, H604-H609.
- 1503 Mitchell, P.S., Parkin, R.K., Kroh, E.M., Fritz, B.R., Wyman, S.K., Pogosova-Agadjanyan, E.L.,  
1504 Peterson, A., Noteboom, J., O'Briant, K.C., Allen, A., *et al.* (2008). Circulating microRNAs as  
1505 stable blood-based markers for cancer detection. *Proc Natl Acad Sci U S A* 105, 10513-10518.
- 1506 Nagy, A., Lanczky, A., Menyhart, O., and Gyorffy, B. (2018). Validation of miRNA prognostic  
1507 power in hepatocellular carcinoma using expression data of independent datasets. *Sci Rep* 8,  
1508 9227.
- 1509 Nagy, A., Munkacsy, G., and Gyorffy, B. (2021). Pancancer survival analysis of cancer hallmark  
1510 genes. *Sci Rep* 11, 6047.
- 1511 Nersisyan, S., Engibaryan, N., Gorbonos, A., Kirdey, K., Makhonin, A., and Tonevitsky, A.  
1512 (2020). Potential role of cellular miRNAs in coronavirus-host interplay. *PeerJ* 8, e9994.
- 1513 Nishiga, M., Wang, D.W., Han, Y., Lewis, D.B., and Wu, J.C. (2020). COVID-19 and  
1514 cardiovascular disease: from basic mechanisms to clinical perspectives. *Nat Rev Cardiol* 17, 543-  
1515 558.
- 1516 Ochsner, S.A., Pillich, R.T., and McKenna, N.J. (2020). Consensus transcriptional regulatory  
1517 networks of coronavirus-infected human cells. *Sci Data* 7, 314.
- 1518 Ottosen, S., Parsley, T.B., Yang, L., Zeh, K., van Doorn, L.J., van der Veer, E., Raney, A.K.,  
1519 Hodges, M.R., and Patick, A.K. (2015). In vitro antiviral activity and preclinical and clinical  
1520 resistance profile of miravirsin, a novel anti-hepatitis C virus therapeutic targeting the human  
1521 factor miR-122. *Antimicrob Agents Chemother* 59, 599-608.
- 1522 Park, J., Foux, J., Hether, T., Danko, D., Warren, S., Kim, Y., Reeves, J., Butler, D.J., Mozsary,  
1523 C., Rosiene, J., *et al.* (2021). Systemic Tissue and Cellular Disruption from SARS-CoV-2  
1524 Infection revealed in COVID-19 Autopsies and Spatial Omics Tissue Maps. *bioRxiv*,  
1525 2021.2003.2008.434433.
- 1526 Park, J.L., Park, S.M., Kwon, O.H., Lee, H.C., Kim, J.Y., Seok, H.H., Lee, W.S., Lee, S.H.,  
1527 Kim, Y.S., Woo, K.M., *et al.* (2014). Microarray screening and qRT-PCR evaluation of  
1528 microRNA markers for forensic body fluid identification. *Electrophoresis* 35, 3062-3068.
- 1529 Patro, R., Duggal, G., Love, M.I., Irizarry, R.A., and Kingsford, C. (2017). Salmon provides fast  
1530 and bias-aware quantification of transcript expression. *Nat Methods* 14, 417-419.

- 1531 Polack, F.P., Thomas, S.J., Kitchin, N., Absalon, J., Gurtman, A., Lockhart, S., Perez, J.L., Perez  
1532 Marc, G., Moreira, E.D., Zerbini, C., *et al.* (2020). Safety and Efficacy of the BNT162b2 mRNA  
1533 Covid-19 Vaccine. *N Engl J Med* 383, 2603-2615.
- 1534 Pontecorvi, G., Bellenghi, M., Ortona, E., and Care, A. (2020). microRNAs as new possible  
1535 actors in gender disparities of Covid-19 pandemic. *Acta Physiol (Oxf)* 230, e13538.
- 1536 Poppe, M., Wittig, S., Jurida, L., Bartkuhn, M., Wilhelm, J., Muller, H., Beuerlein, K., Karl, N.,  
1537 Bhujju, S., Ziebuhr, J., *et al.* (2017). The NF-kappaB-dependent and -independent transcriptome  
1538 and chromatin landscapes of human coronavirus 229E-infected cells. *PLoS Pathog* 13,  
1539 e1006286.
- 1540 Portincasa, P., Krawczyk, M., Machill, A., Lammert, F., and Di Ciaula, A. (2020). Hepatic  
1541 consequences of COVID-19 infection. Lapping or biting? *Eur J Intern Med* 77, 18-24.
- 1542 Rath, S., Sharma, R., Gupta, R., Ast, T., Chan, C., Durham, T.J., Goodman, R.P., Grabarek, Z.,  
1543 Haas, M.E., Hung, W.H.W., *et al.* (2021). MitoCarta3.0: an updated mitochondrial proteome  
1544 now with sub-organelle localization and pathway annotations. *Nucleic Acids Res* 49, D1541-  
1545 D1547.
- 1546 Rodriguez, M., Soler, Y., Perry, M., Reynolds, J.L., and El-Hage, N. (2020). Impact of Severe  
1547 Acute Respiratory Syndrome Coronavirus 2 (SARS-CoV-2) in the Nervous System: Implications  
1548 of COVID-19 in Neurodegeneration. *Front Neurol* 11, 583459.
- 1549 Rossi, R., Talarico, M., Coppi, F., and Boriani, G. (2020). Protective role of statins in COVID 19  
1550 patients: importance of pharmacokinetic characteristics rather than intensity of action. *Intern  
1551 Emerg Med* 15, 1573-1576.
- 1552 Rother, N., Yanginlar, C., Lindeboom, R.G.H., Bekkering, S., van Leent, M.M.T., Buijsers, B.,  
1553 Jonkman, I., de Graaf, M., Baltissen, M., Lamers, L.A., *et al.* (2020). Hydroxychloroquine  
1554 Inhibits the Trained Innate Immune Response to Interferons. *Cell Rep Med* 1, 100146.
- 1555 Rupaimoole, R., and Slack, F.J. (2017). MicroRNA therapeutics: towards a new era for the  
1556 management of cancer and other diseases. *Nat Rev Drug Discov* 16, 203-222.
- 1557 Sacar Demirci, M.D., and Adan, A. (2020). Computational analysis of microRNA-mediated  
1558 interactions in SARS-CoV-2 infection. *PeerJ* 8, e9369.
- 1559 Sadoff, J., Le Gars, M., Shukarev, G., Heerwegh, D., Truysers, C., de Groot, A.M., Stoop, J.,  
1560 Tete, S., Van Damme, W., Leroux-Roels, I., *et al.* (2021). Interim Results of a Phase 1-2a Trial  
1561 of Ad26.COV2.S Covid-19 Vaccine. *N Engl J Med*.
- 1562 Sadowska, A.M., Manuel-y-Keenoy, B., Vertongen, T., Schippers, G., Radomska-Lesniewska,  
1563 D., Heytens, E., and De Backer, W.A. (2006). Effect of N-acetylcysteine on neutrophil activation  
1564 markers in healthy volunteers: in vivo and in vitro study. *Pharmacol Res* 53, 216-225.
- 1565 Sardar, R., Satish, D., and Gupta, D. (2020). Identification of Novel SARS-CoV-2 Drug Targets  
1566 by Host MicroRNAs and Transcription Factors Co-regulatory Interaction Network Analysis.  
1567 *Front Genet* 11, 571274.
- 1568 Schult, P., Roth, H., Adams, R.L., Mas, C., Imbert, L., Orlik, C., Ruggieri, A., Pyle, A.M., and  
1569 Lohmann, V. (2018). microRNA-122 amplifies hepatitis C virus translation by shaping the  
1570 structure of the internal ribosomal entry site. *Nat Commun* 9, 2613.

- 1571 Self, W.H., Tenforde, M.W., Stubblefield, W.B., Feldstein, L.R., Steingrub, J.S., Shapiro, N.I.,  
1572 Ginde, A.A., Prekker, M.E., Brown, S.M., Peltan, I.D., *et al.* (2020). Decline in SARS-CoV-2  
1573 Antibodies After Mild Infection Among Frontline Health Care Personnel in a Multistate Hospital  
1574 Network - 12 States, April-August 2020. *MMWR Morb Mortal Wkly Rep* 69, 1762-1766.
- 1575 Shannon, P., Markiel, A., Ozier, O., Baliga, N.S., Wang, J.T., Ramage, D., Amin, N.,  
1576 Schwikowski, B., and Ideker, T. (2003). Cytoscape: a software environment for integrated  
1577 models of biomolecular interaction networks. *Genome Res* 13, 2498-2504.
- 1578 Shu, Y., and McCauley, J. (2017). GISAID: Global initiative on sharing all influenza data - from  
1579 vision to reality. *Euro Surveill* 22.
- 1580 Singh, U., Hur, M., Dorman, K., and Wurtele, E.S. (2020). MetaOmGraph: a workbench for  
1581 interactive exploratory data analysis of large expression datasets. *Nucleic Acids Res* 48, e23.
- 1582 Singh, U., Li, J., Seetharam, A., and Wurtele, E.S. (2021). pyrpipe: a python package for RNA-  
1583 Seq workflows. *bioRxiv*, 2020.2003.2004.925818.
- 1584 Sirin, D.A., and Ozcelik, F. (2021). The relationship between COVID-19 and the dental damage  
1585 stage determined by radiological examination. *Oral Radiol*.
- 1586 Sirota, M., Dudley, J.T., Kim, J., Chiang, A.P., Morgan, A.A., Sweet-Cordero, A., Sage, J., and  
1587 Butte, A.J. (2011). Discovery and preclinical validation of drug indications using compendia of  
1588 public gene expression data. *Sci Transl Med* 3, 96ra77.
- 1589 Srivastava, A., Malik, L., Sarkar, H., Zakeri, M., Almodaresi, F., Sonesson, C., Love, M.I.,  
1590 Kingsford, C., and Patro, R. (2020). Alignment and mapping methodology influence transcript  
1591 abundance estimation. *Genome Biol* 21, 239.
- 1592 Su, M., Chen, Y., Qi, S., Shi, D., Feng, L., and Sun, D. (2020). A Mini-Review on Cell Cycle  
1593 Regulation of Coronavirus Infection. *Front Vet Sci* 7, 586826.
- 1594 Subramanian, A., Tamayo, P., Mootha, V.K., Mukherjee, S., Ebert, B.L., Gillette, M.A.,  
1595 Paulovich, A., Pomeroy, S.L., Golub, T.R., Lander, E.S., *et al.* (2005). Gene set enrichment  
1596 analysis: a knowledge-based approach for interpreting genome-wide expression profiles. *Proc*  
1597 *Natl Acad Sci U S A* 102, 15545-15550.
- 1598 Sullivan, K.D., Galbraith, M.D., Kinning, K.T., Bartsch, K., Levinsky, N., Araya, P., Smith,  
1599 K.P., Granrath, R.E., Shaw, J.R., Baxter, R., *et al.* (2021). The COVIDome Explorer Researcher  
1600 Portal. *medRxiv*.
- 1601 Tang, H., Gao, Y., Li, Z., Miao, Y., Huang, Z., Liu, X., Xie, L., Li, H., Wen, W., Zheng, Y., *et*  
1602 *al.* (2020). The noncoding and coding transcriptional landscape of the peripheral immune  
1603 response in patients with COVID-19. *Clin Transl Med* 10, e200.
- 1604 Teodori, L., Sestili, P., Madiari, V., Coppari, S., Fraternali, D., Rocchi, M.B.L., Ramakrishna, S.,  
1605 and Albertini, M.C. (2020). MicroRNAs Bioinformatics Analyses Identifying HDAC Pathway as  
1606 a Putative Target for Existing Anti-COVID-19 Therapeutics. *Front Pharmacol* 11, 582003.
- 1607 Thibault, P.A., Huys, A., Amador-Canizares, Y., Gailius, J.E., Pinel, D.E., and Wilson, J.A.  
1608 (2015). Regulation of Hepatitis C Virus Genome Replication by Xrn1 and MicroRNA-122  
1609 Binding to Individual Sites in the 5' Untranslated Region. *J Virol* 89, 6294-6311.

- 1610 Tribolet, L., Kerr, E., Cowled, C., Bean, A.G.D., Stewart, C.R., Dearnley, M., and Farr, R.J.  
1611 (2020). MicroRNA Biomarkers for Infectious Diseases: From Basic Research to Biosensing.  
1612 *Front Microbiol* *11*, 1197.
- 1613 Trobaugh, D.W., and Klimstra, W.B. (2017). MicroRNA Regulation of RNA Virus Replication  
1614 and Pathogenesis. *Trends Mol Med* *23*, 80-93.
- 1615 V'Kovski, P., Kratzel, A., Steiner, S., Stalder, H., and Thiel, V. (2021). Coronavirus biology and  
1616 replication: implications for SARS-CoV-2. *Nat Rev Microbiol* *19*, 155-170.
- 1617 van der Ree, M.H., de Vree, J.M., Stelma, F., Willemsse, S., van der Valk, M., Rietdijk, S.,  
1618 Molenkamp, R., Schinkel, J., van Nuenen, A.C., Beuers, U., *et al.* (2017). Safety, tolerability,  
1619 and antiviral effect of RG-101 in patients with chronic hepatitis C: a phase 1B, double-blind,  
1620 randomised controlled trial. *Lancet* *389*, 709-717.
- 1621 Vejnar, C.E., and Zdobnov, E.M. (2012). MiRmap: comprehensive prediction of microRNA  
1622 target repression strength. *Nucleic Acids Res* *40*, 11673-11683.
- 1623 Wallace, D.C. (2018). Mitochondrial genetic medicine. *Nat Genet* *50*, 1642-1649.
- 1624 Walsh-Messinger, J., Manis, H., Vrabec, A., Sizemore, J., Bishof, K., Debidda, M., Malaspina,  
1625 D., and Greenspan, N. (2020). The Kids Are Not Alright: A Preliminary Report of Post-COVID  
1626 Syndrome in University Students. medRxiv.
- 1627 West, A.P., Khoury-Hanold, W., Staron, M., Tal, M.C., Pineda, C.M., Lang, S.M., Bestwick, M.,  
1628 Duguay, B.A., Raimundo, N., MacDuff, D.A., *et al.* (2015). Mitochondrial DNA stress primes  
1629 the antiviral innate immune response. *Nature* *520*, 553-557.
- 1630 West, A.P., and Shadel, G.S. (2017). Mitochondrial DNA in innate immune responses and  
1631 inflammatory pathology. *Nat Rev Immunol* *17*, 363-375.
- 1632 Wickham, H. (2016). *ggplot2: Elegant Graphics for Data Analysis* (Springer-Verlag New York).
- 1633 Widiasta, A., Sribudiani, Y., Nugrahapraja, H., Hilmanto, D., Sekarwana, N., and Rachmadi, D.  
1634 (2020). Potential role of ACE2-related microRNAs in COVID-19-associated nephropathy.  
1635 *Noncoding RNA Res* *5*, 153-166.
- 1636 Yang, J., Li, C., Li, H., and E, C. (2019). LncRNA CACNA1G-AS1 facilitates hepatocellular  
1637 carcinoma progression through the miR-2392/C1orf61 pathway. *J Cell Physiol* *234*, 18415-  
1638 18422.
- 1639 Yang, S., Pei, Y., Li, X., Zhao, S., Zhu, M., and Zhao, A. (2016). miR-124 attenuates Japanese  
1640 encephalitis virus replication by targeting DNM2. *Virol J* *13*, 105.
- 1641 Younis, J.S., Abassi, Z., and Skorecki, K. (2020). Is there an impact of the COVID-19 pandemic  
1642 on male fertility? The ACE2 connection. *Am J Physiol Endocrinol Metab* *318*, E878-E880.
- 1643 Zamani, B., Moeini Taba, S.M., and Shayestehpour, M. (2021). Systemic lupus erythematosus  
1644 manifestation following COVID-19: a case report. *J Med Case Rep* *15*, 29.
- 1645 Zhong, Z., Liang, S., Sanchez-Lopez, E., He, F., Shalpour, S., Lin, X.J., Wong, J., Ding, S.,  
1646 Seki, E., Schnabl, B., *et al.* (2018). New mitochondrial DNA synthesis enables NLRP3  
1647 inflammasome activation. *Nature* *560*, 198-203.
- 1648 Zhu, N., Zhang, D., Wang, W., Li, X., Yang, B., Song, J., Zhao, X., Huang, B., Shi, W., Lu, R.,  
1649 *et al.* (2020). A Novel Coronavirus from Patients with Pneumonia in China, 2019. *N Engl J Med*  
1650 *382*, 727-733.

- 1651 Abdelrahman, Z., Liu, Q., Jiang, S., Li, M., Sun, Q., Zhang, Y., and Wang, X. (2021). Evaluation  
1652 of the Current Therapeutic Approaches for COVID-19: A Systematic Review and a Meta-  
1653 analysis. *Front Pharmacol* 12, 607408.
- 1654 Alamdari, D.H., Moghaddam, A.B., Amini, S., Keramati, M.R., Zarmehri, A.M., Alamdari,  
1655 A.H., Damsaz, M., Banpour, H., Yarahmadi, A., and Koliakos, G. (2020). Application of  
1656 methylene blue -vitamin C -N-acetyl cysteine for treatment of critically ill COVID-19 patients,  
1657 report of a phase-I clinical trial. *Eur J Pharmacol* 885, 173494.
- 1658 Ardestani, A., and Azizi, Z. (2021). Targeting glucose metabolism for treatment of COVID-19.  
1659 *Signal Transduct Target Ther* 6, 112.
- 1660 Bojkova, D., Klann, K., Koch, B., Widera, M., Krause, D., Ciesek, S., Cinatl, J., and Munch, C.  
1661 (2020). Proteomics of SARS-CoV-2-infected host cells reveals therapy targets. *Nature* 583, 469-  
1662 472.
- 1663 Codo, A.C., Davanzo, G.G., Monteiro, L.B., de Souza, G.F., Muraro, S.P., Virgilio-da-Silva,  
1664 J.V., Prodonoff, J.S., Carregari, V.C., de Biagi Junior, C.A.O., Crunfli, F., *et al.* (2020). Elevated  
1665 Glucose Levels Favor SARS-CoV-2 Infection and Monocyte Response through a HIF-  
1666 1alpha/Glycolysis-Dependent Axis. *Cell Metab* 32, 437-446 e435.
- 1667 Mishra, P.K., Tandon, R., and Byrareddy, S.N. (2020). Diabetes and COVID-19 risk: an miRNA  
1668 perspective. *Am J Physiol Heart Circ Physiol* 319, H604-H609.
- 1669 Nersisyan, S., Engibaryan, N., Gorbonos, A., Kirdey, K., Makhonin, A., and Tonevitsky, A.  
1670 (2020). Potential role of cellular miRNAs in coronavirus-host interplay. *PeerJ* 8, e9994.
- 1671 Overbey, E.G., Saravia-Butler, A.M., Zhang, Z., Rathi, K.S., Fogle, H., da Silveira, W.A.,  
1672 Barker, R.J., Bass, J.J., Beheshti, A., Berrios, D.C., *et al.* (2021). NASA GeneLab RNA-seq  
1673 consensus pipeline: standardized processing of short-read RNA-seq data. *iScience* 24.
- 1674 Portincasa, P., Krawczyk, M., Machill, A., Lammert, F., and Di Ciaula, A. (2020). Hepatic  
1675 consequences of COVID-19 infection. Lapping or biting? *Eur J Intern Med* 77, 18-24.
- 1676 Ren, L., Zhang, R., Rao, J., Xiao, Y., Zhang, Z., Yang, B., Cao, D., Zhong, H., Ning, P., Shang,  
1677 Y., *et al.* (2018). Transcriptionally Active Lung Microbiome and Its Association with Bacterial  
1678 Biomass and Host Inflammatory Status. *mSystems* 3.
- 1679 Ritchie, M.E., Phipson, B., Wu, D., Hu, Y., Law, C.W., Shi, W., and Smyth, G.K. (2015). limma  
1680 powers differential expression analyses for RNA-sequencing and microarray studies. *Nucleic  
1681 Acids Res* 43, e47.
- 1682 Sacar Demirci, M.D., and Adan, A. (2020). Computational analysis of microRNA-mediated  
1683 interactions in SARS-CoV-2 infection. *PeerJ* 8, e9369.
- 1684 Sardar, R., Satish, D., and Gupta, D. (2020). Identification of Novel SARS-CoV-2 Drug Targets  
1685 by Host MicroRNAs and Transcription Factors Co-regulatory Interaction Network Analysis.  
1686 *Front Genet* 11, 571274.
- 1687 Shen, Z., Xiao, Y., Kang, L., Ma, W., Shi, L., Zhang, L., Zhou, Z., Yang, J., Zhong, J., Yang, D.,  
1688 *et al.* (2020). Genomic Diversity of Severe Acute Respiratory Syndrome-Coronavirus 2 in  
1689 Patients With Coronavirus Disease 2019. *Clin Infect Dis* 71, 713-720.



- 1690 Stukalov, A., Girault, V., Grass, V., Karayel, O., Bergant, V., Urban, C., Haas, D.A., Huang, Y.,  
1691 Oubraham, L., Wang, A., *et al.* (2021). Multilevel proteomics reveals host perturbations by  
1692 SARS-CoV-2 and SARS-CoV. *bioRxiv*, 2020.2006.2017.156455.
- 1693 Teodori, L., Sestili, P., Madiati, V., Coppari, S., Fraternali, D., Rocchi, M.B.L., Ramakrishna, S.,  
1694 and Albertini, M.C. (2020). MicroRNAs Bioinformatics Analyses Identifying HDAC Pathway as  
1695 a Putative Target for Existing Anti-COVID-19 Therapeutics. *Front Pharmacol* *11*, 582003.
- 1696 Widiasta, A., Sribudiani, Y., Nugrahapraja, H., Hilmanto, D., Sekarwana, N., and Rachmadi, D.  
1697 (2020). Potential role of ACE2-related microRNAs in COVID-19-associated nephropathy.  
1698 *Noncoding RNA Res* *5*, 153-166.
- 1699 Zhang, S., Amahong, K., Sun, X., Lian, X., Liu, J., Sun, H., Lou, Y., Zhu, F., and Qiu, Y. (2021).  
1700 The miRNA: a small but powerful RNA for COVID-19. *Brief Bioinform* *22*, 1137-1149.
- 1701



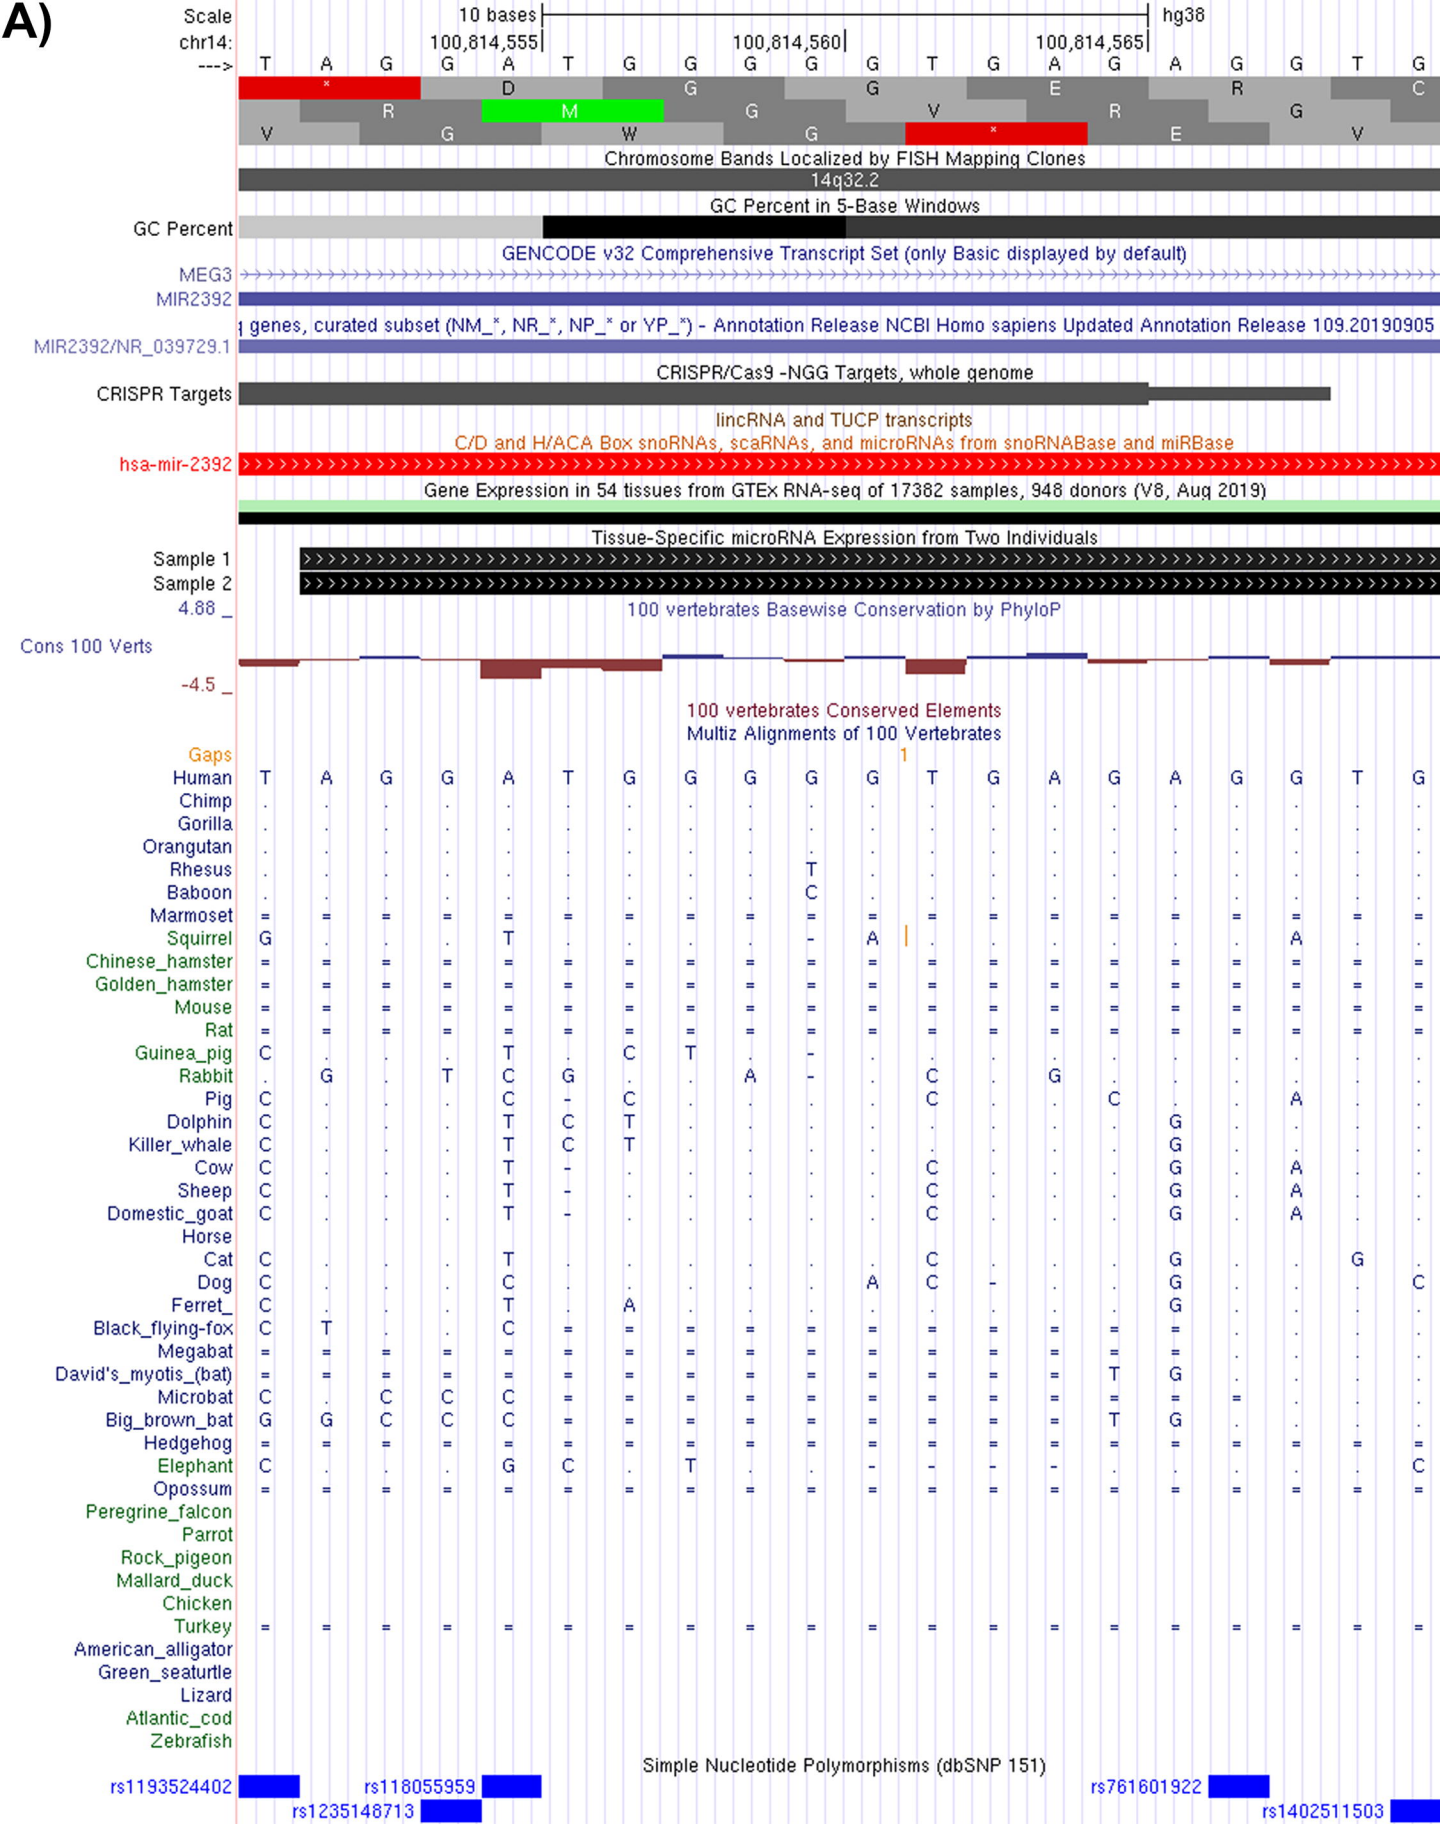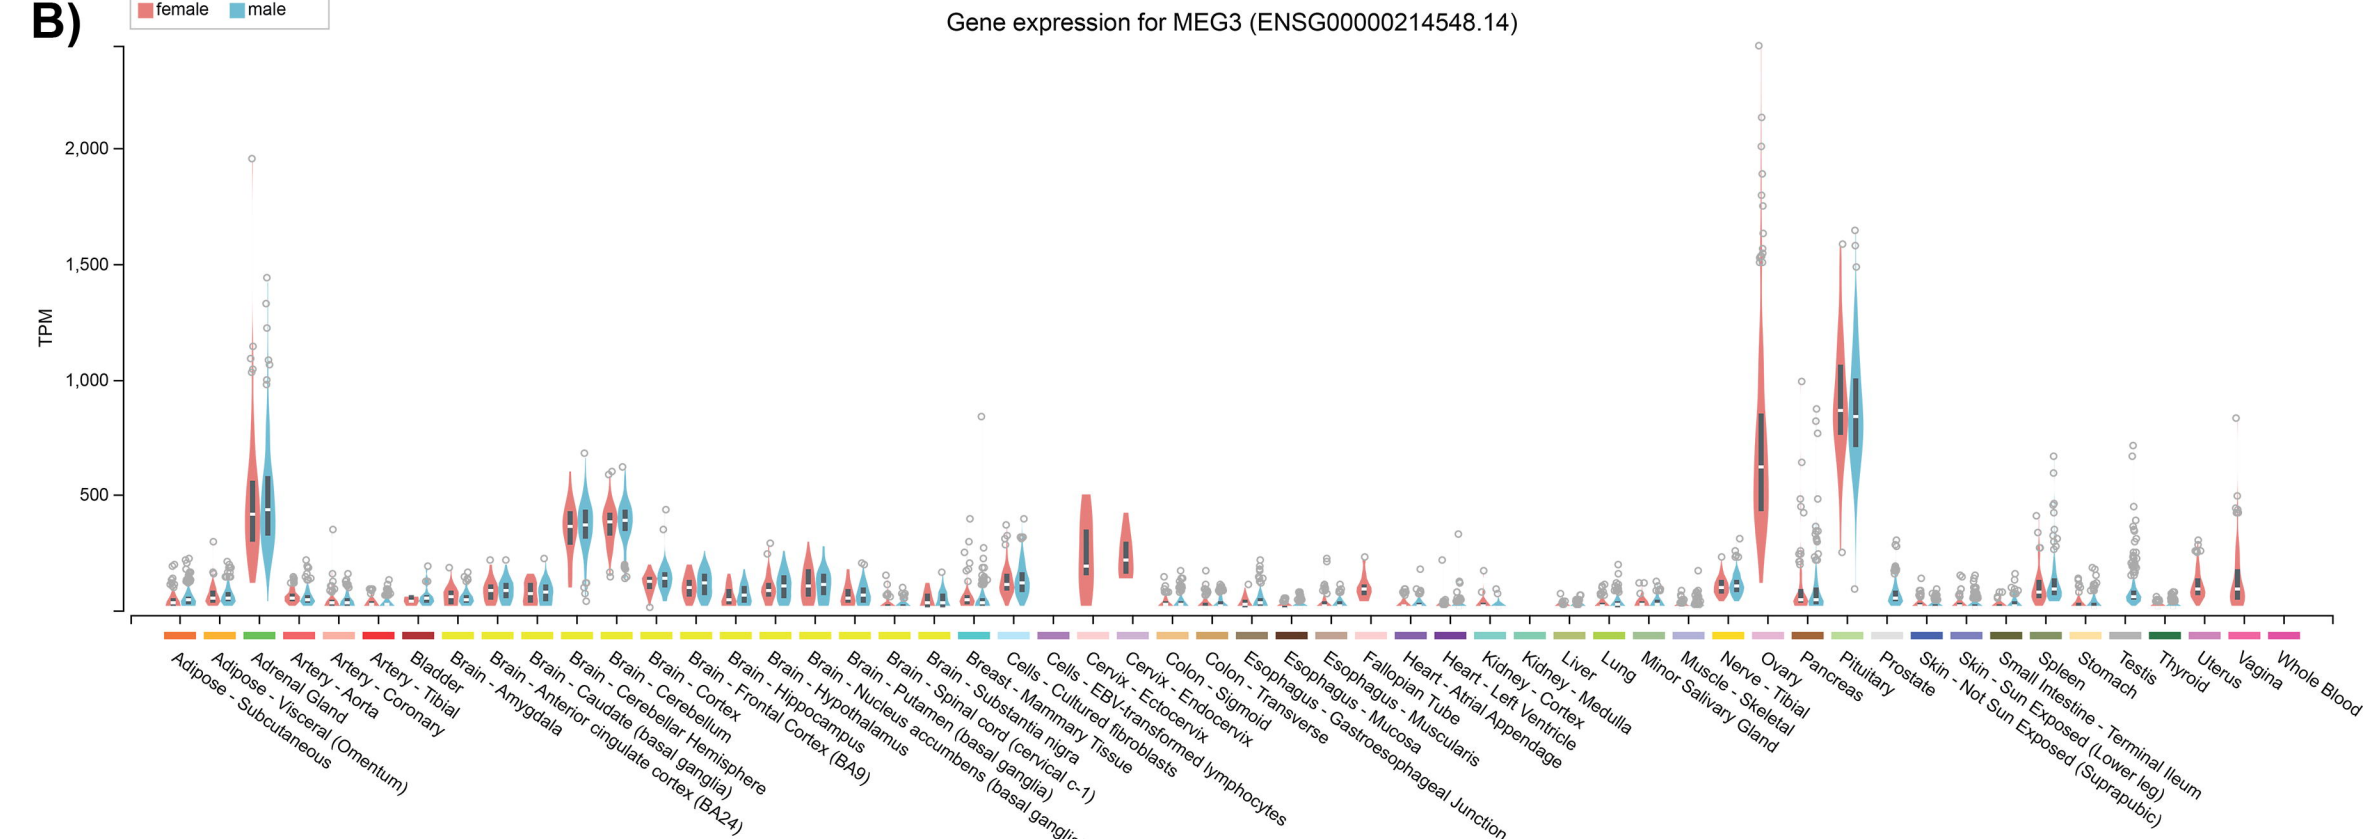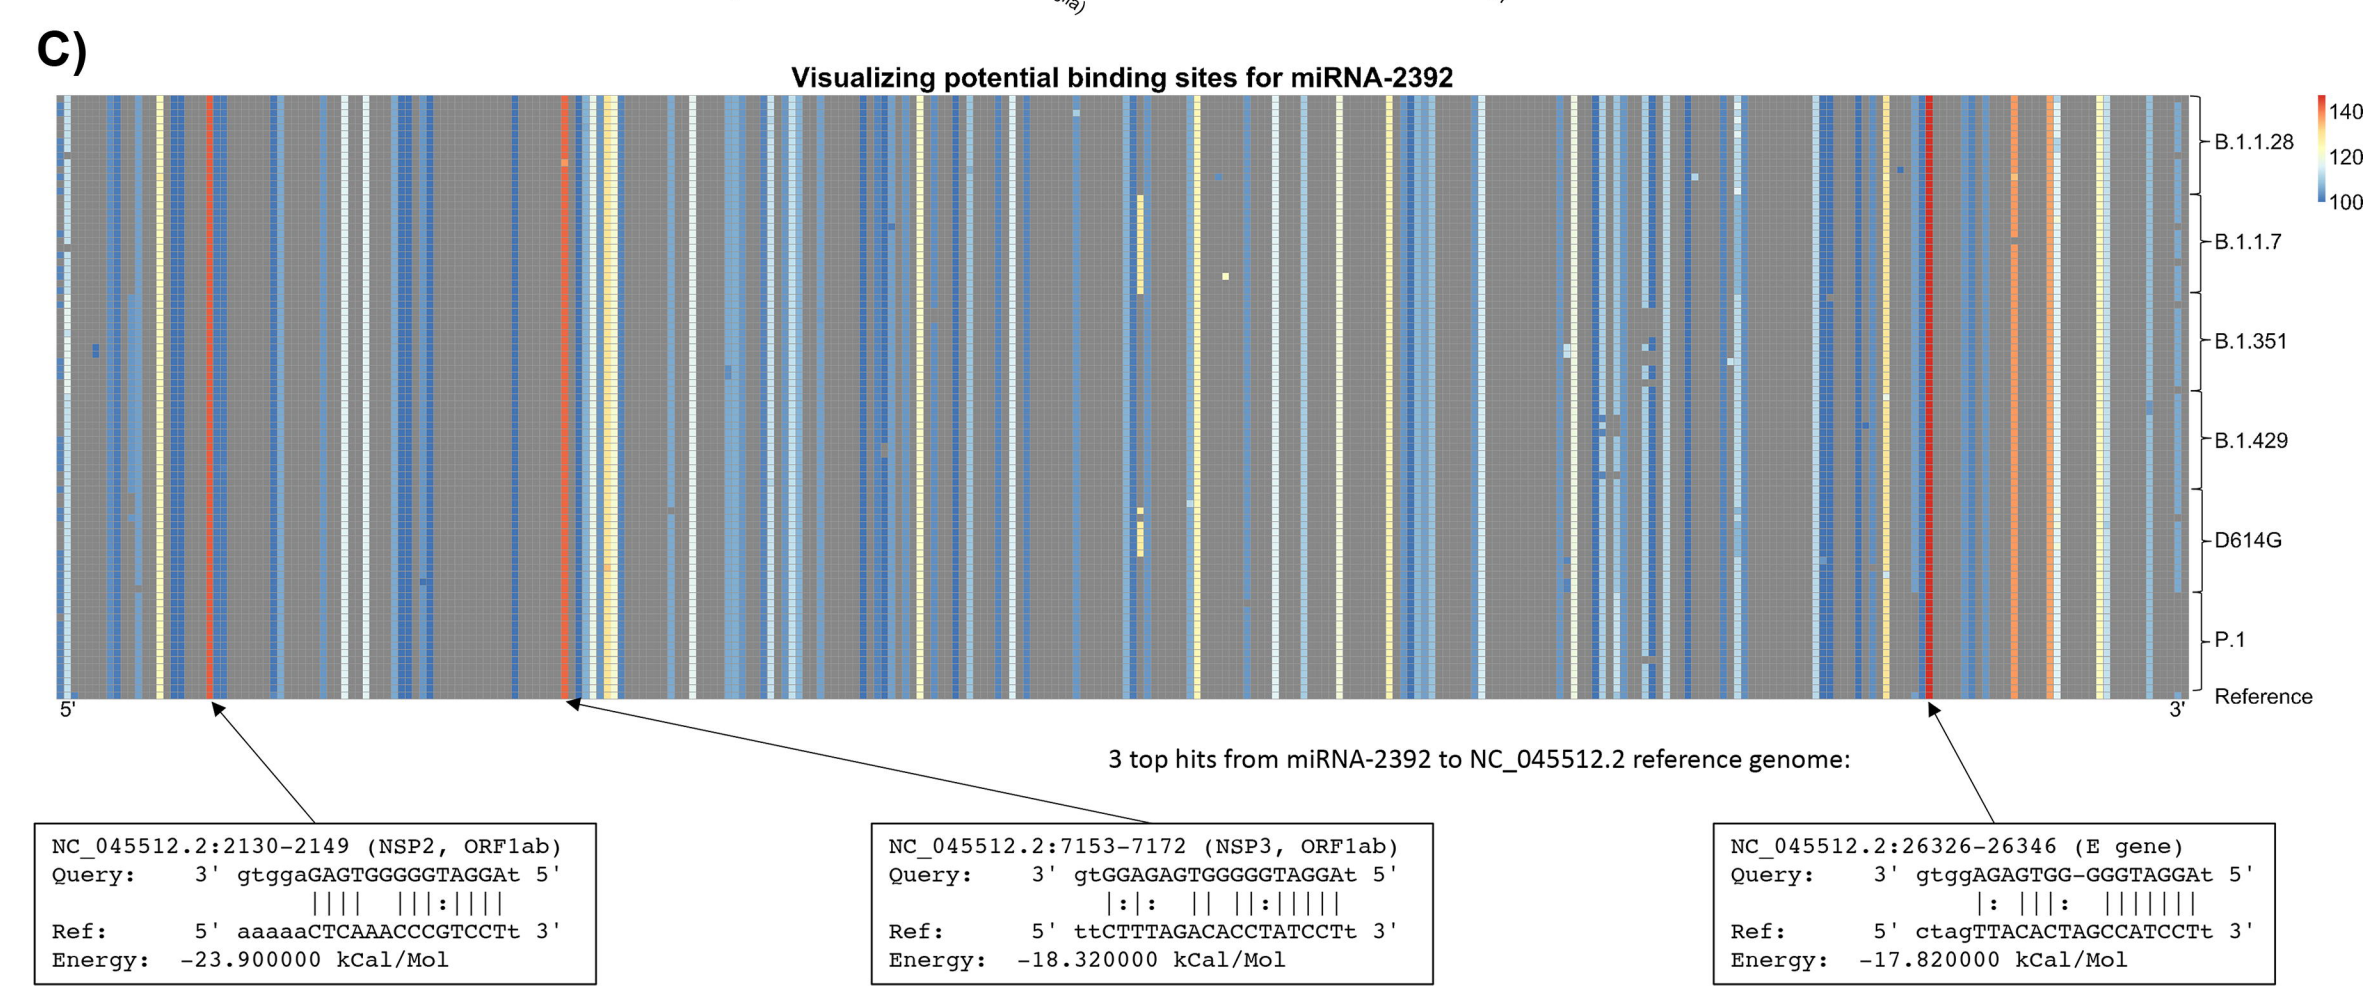

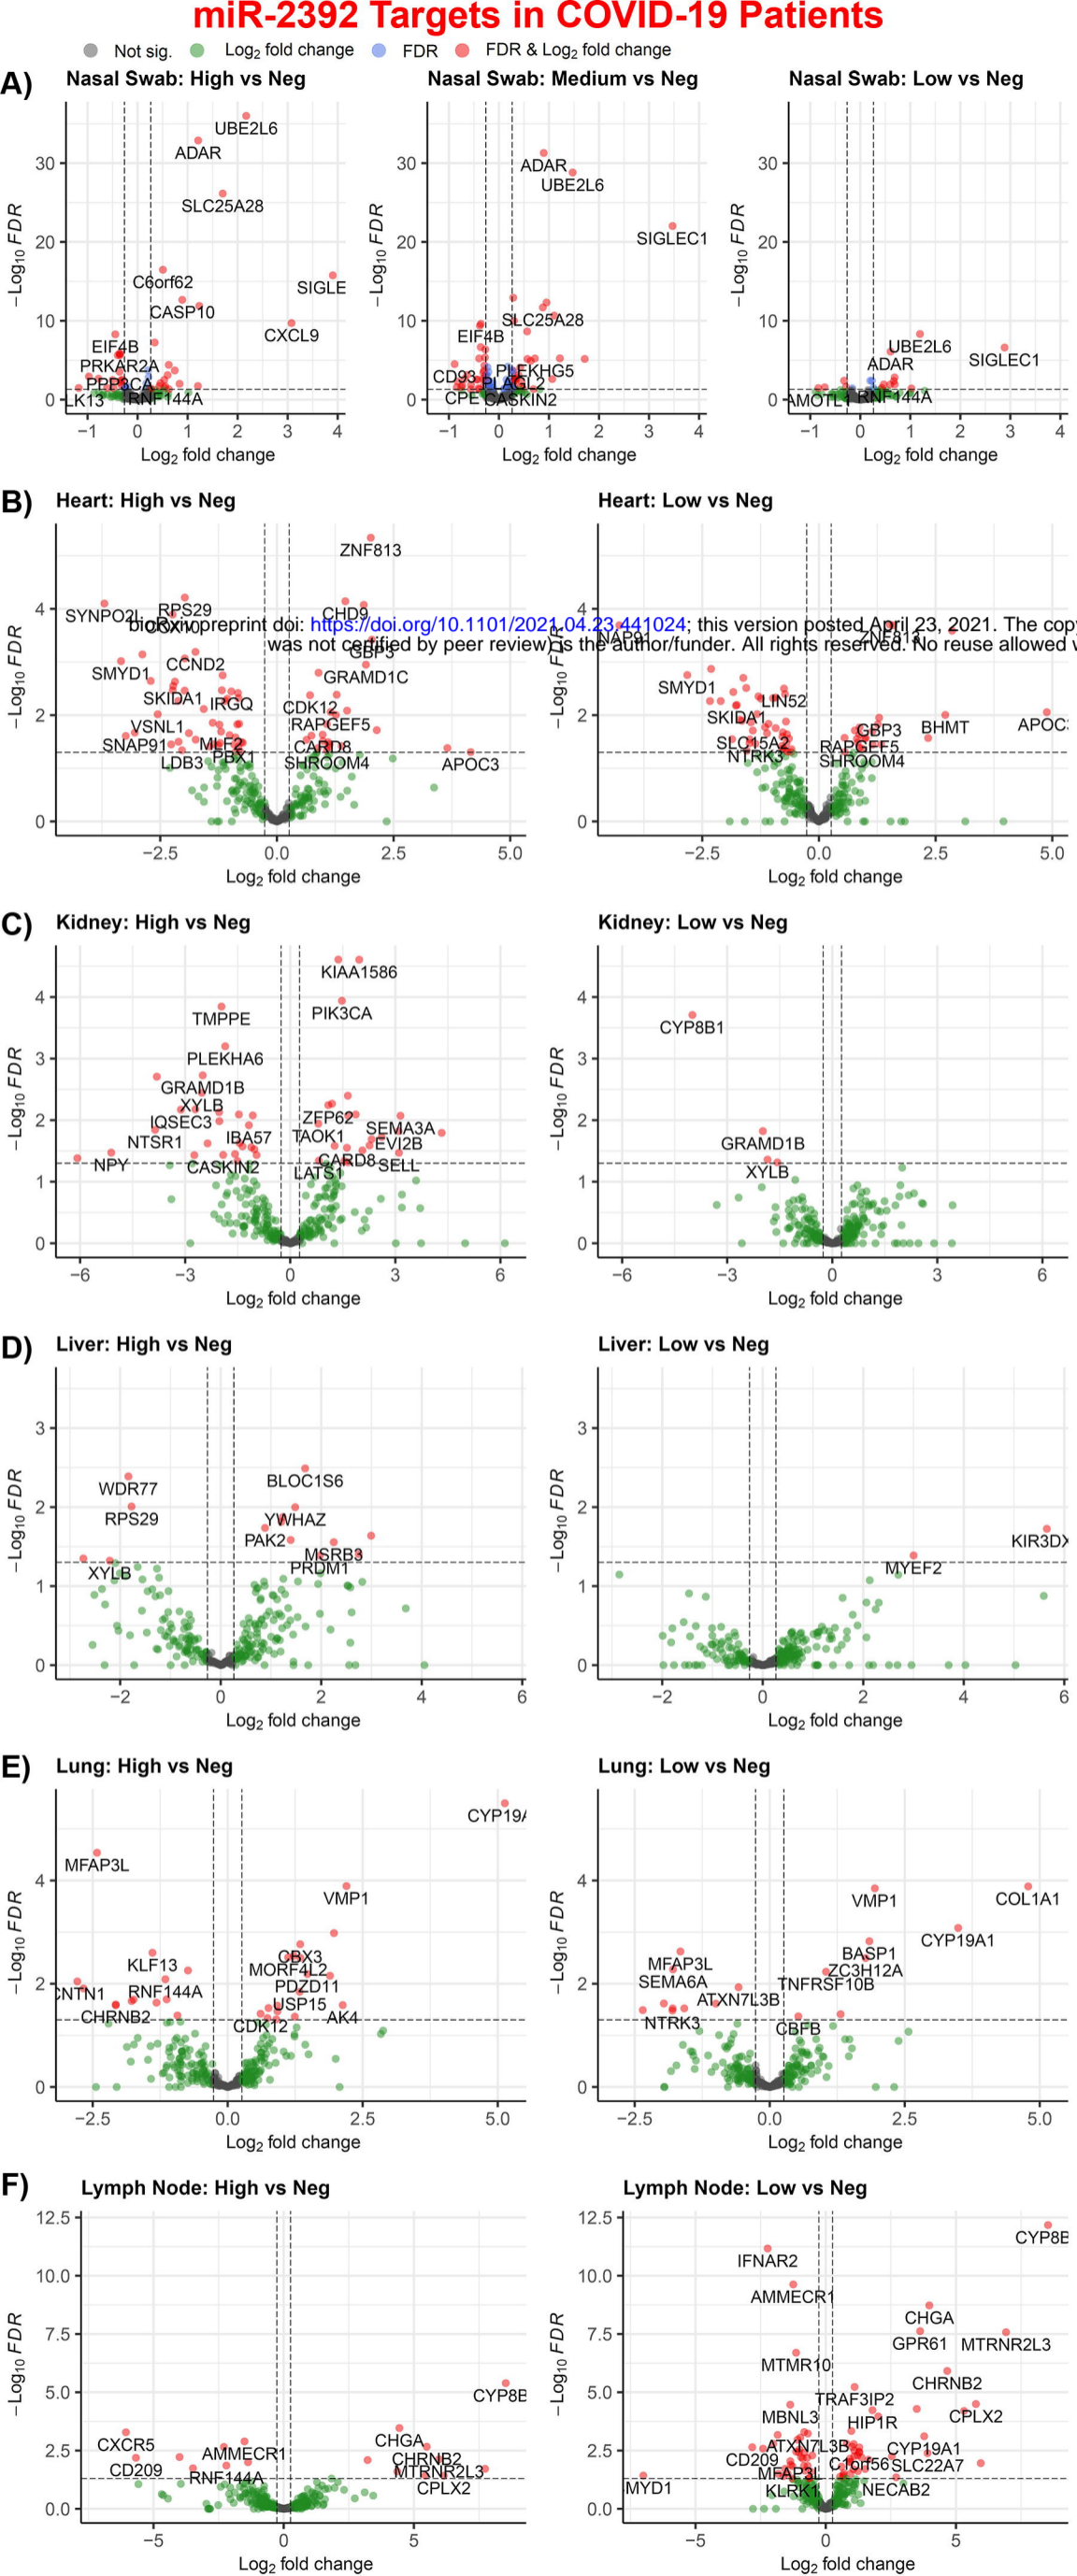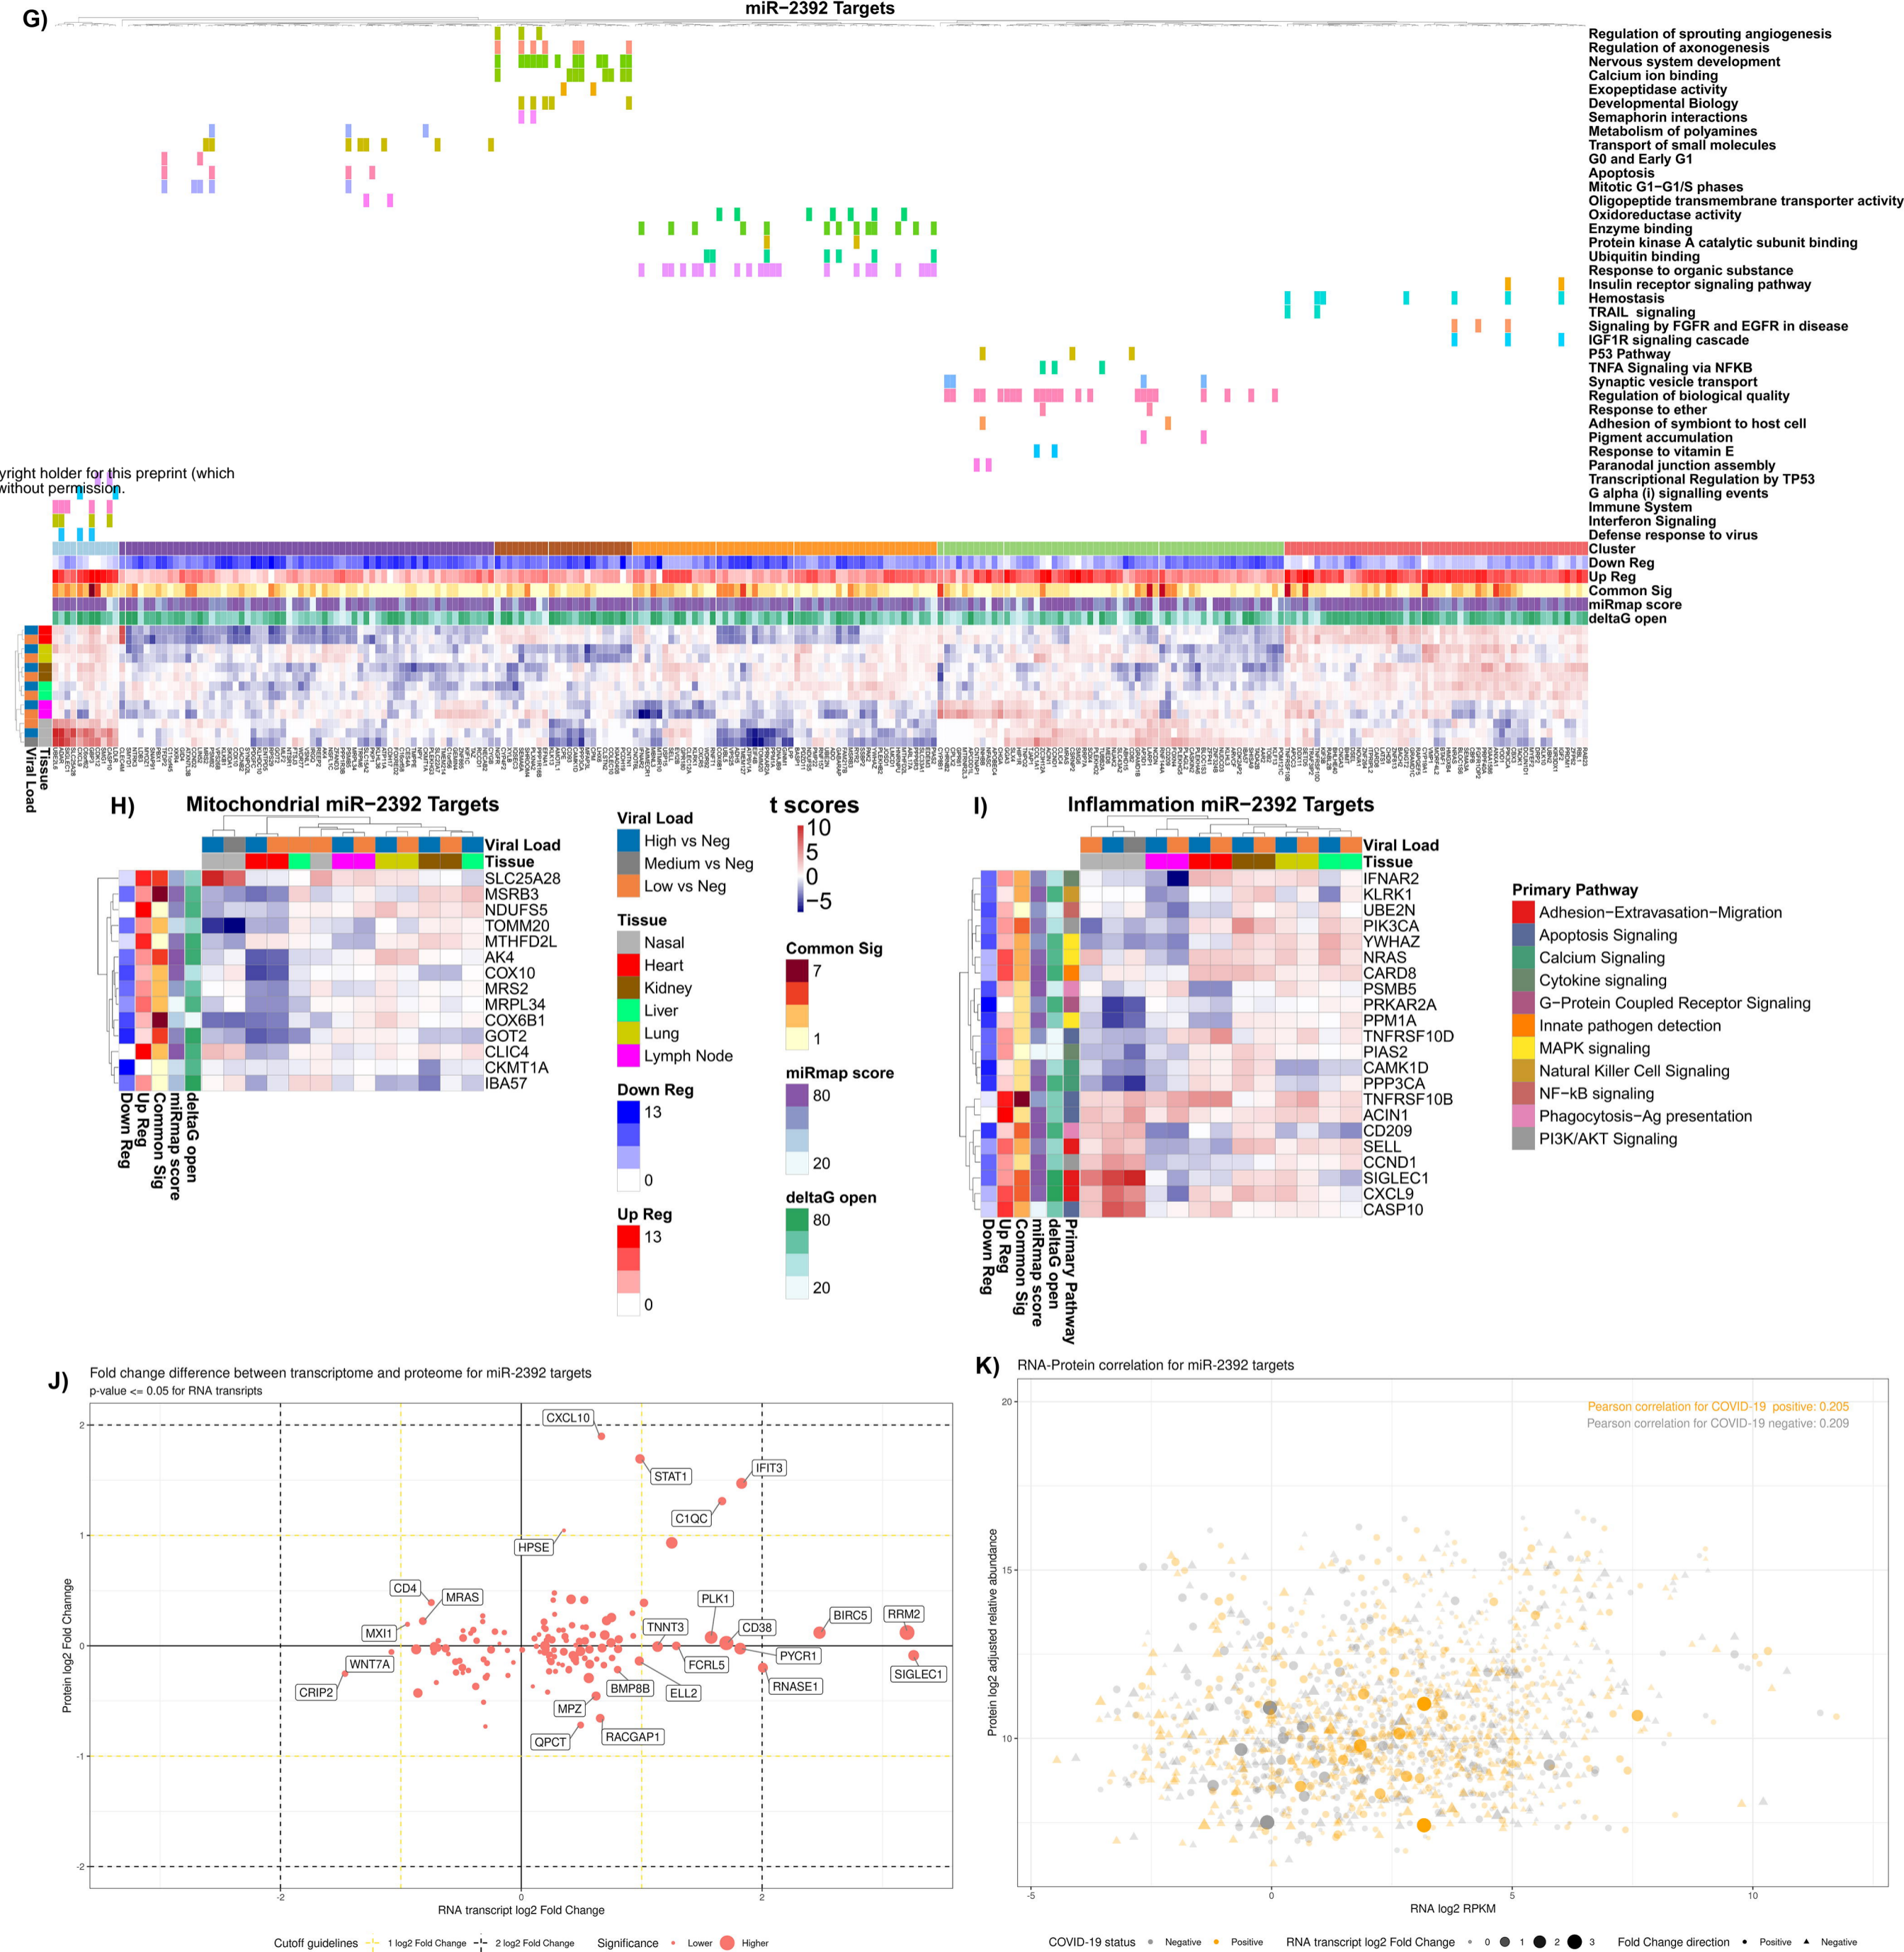

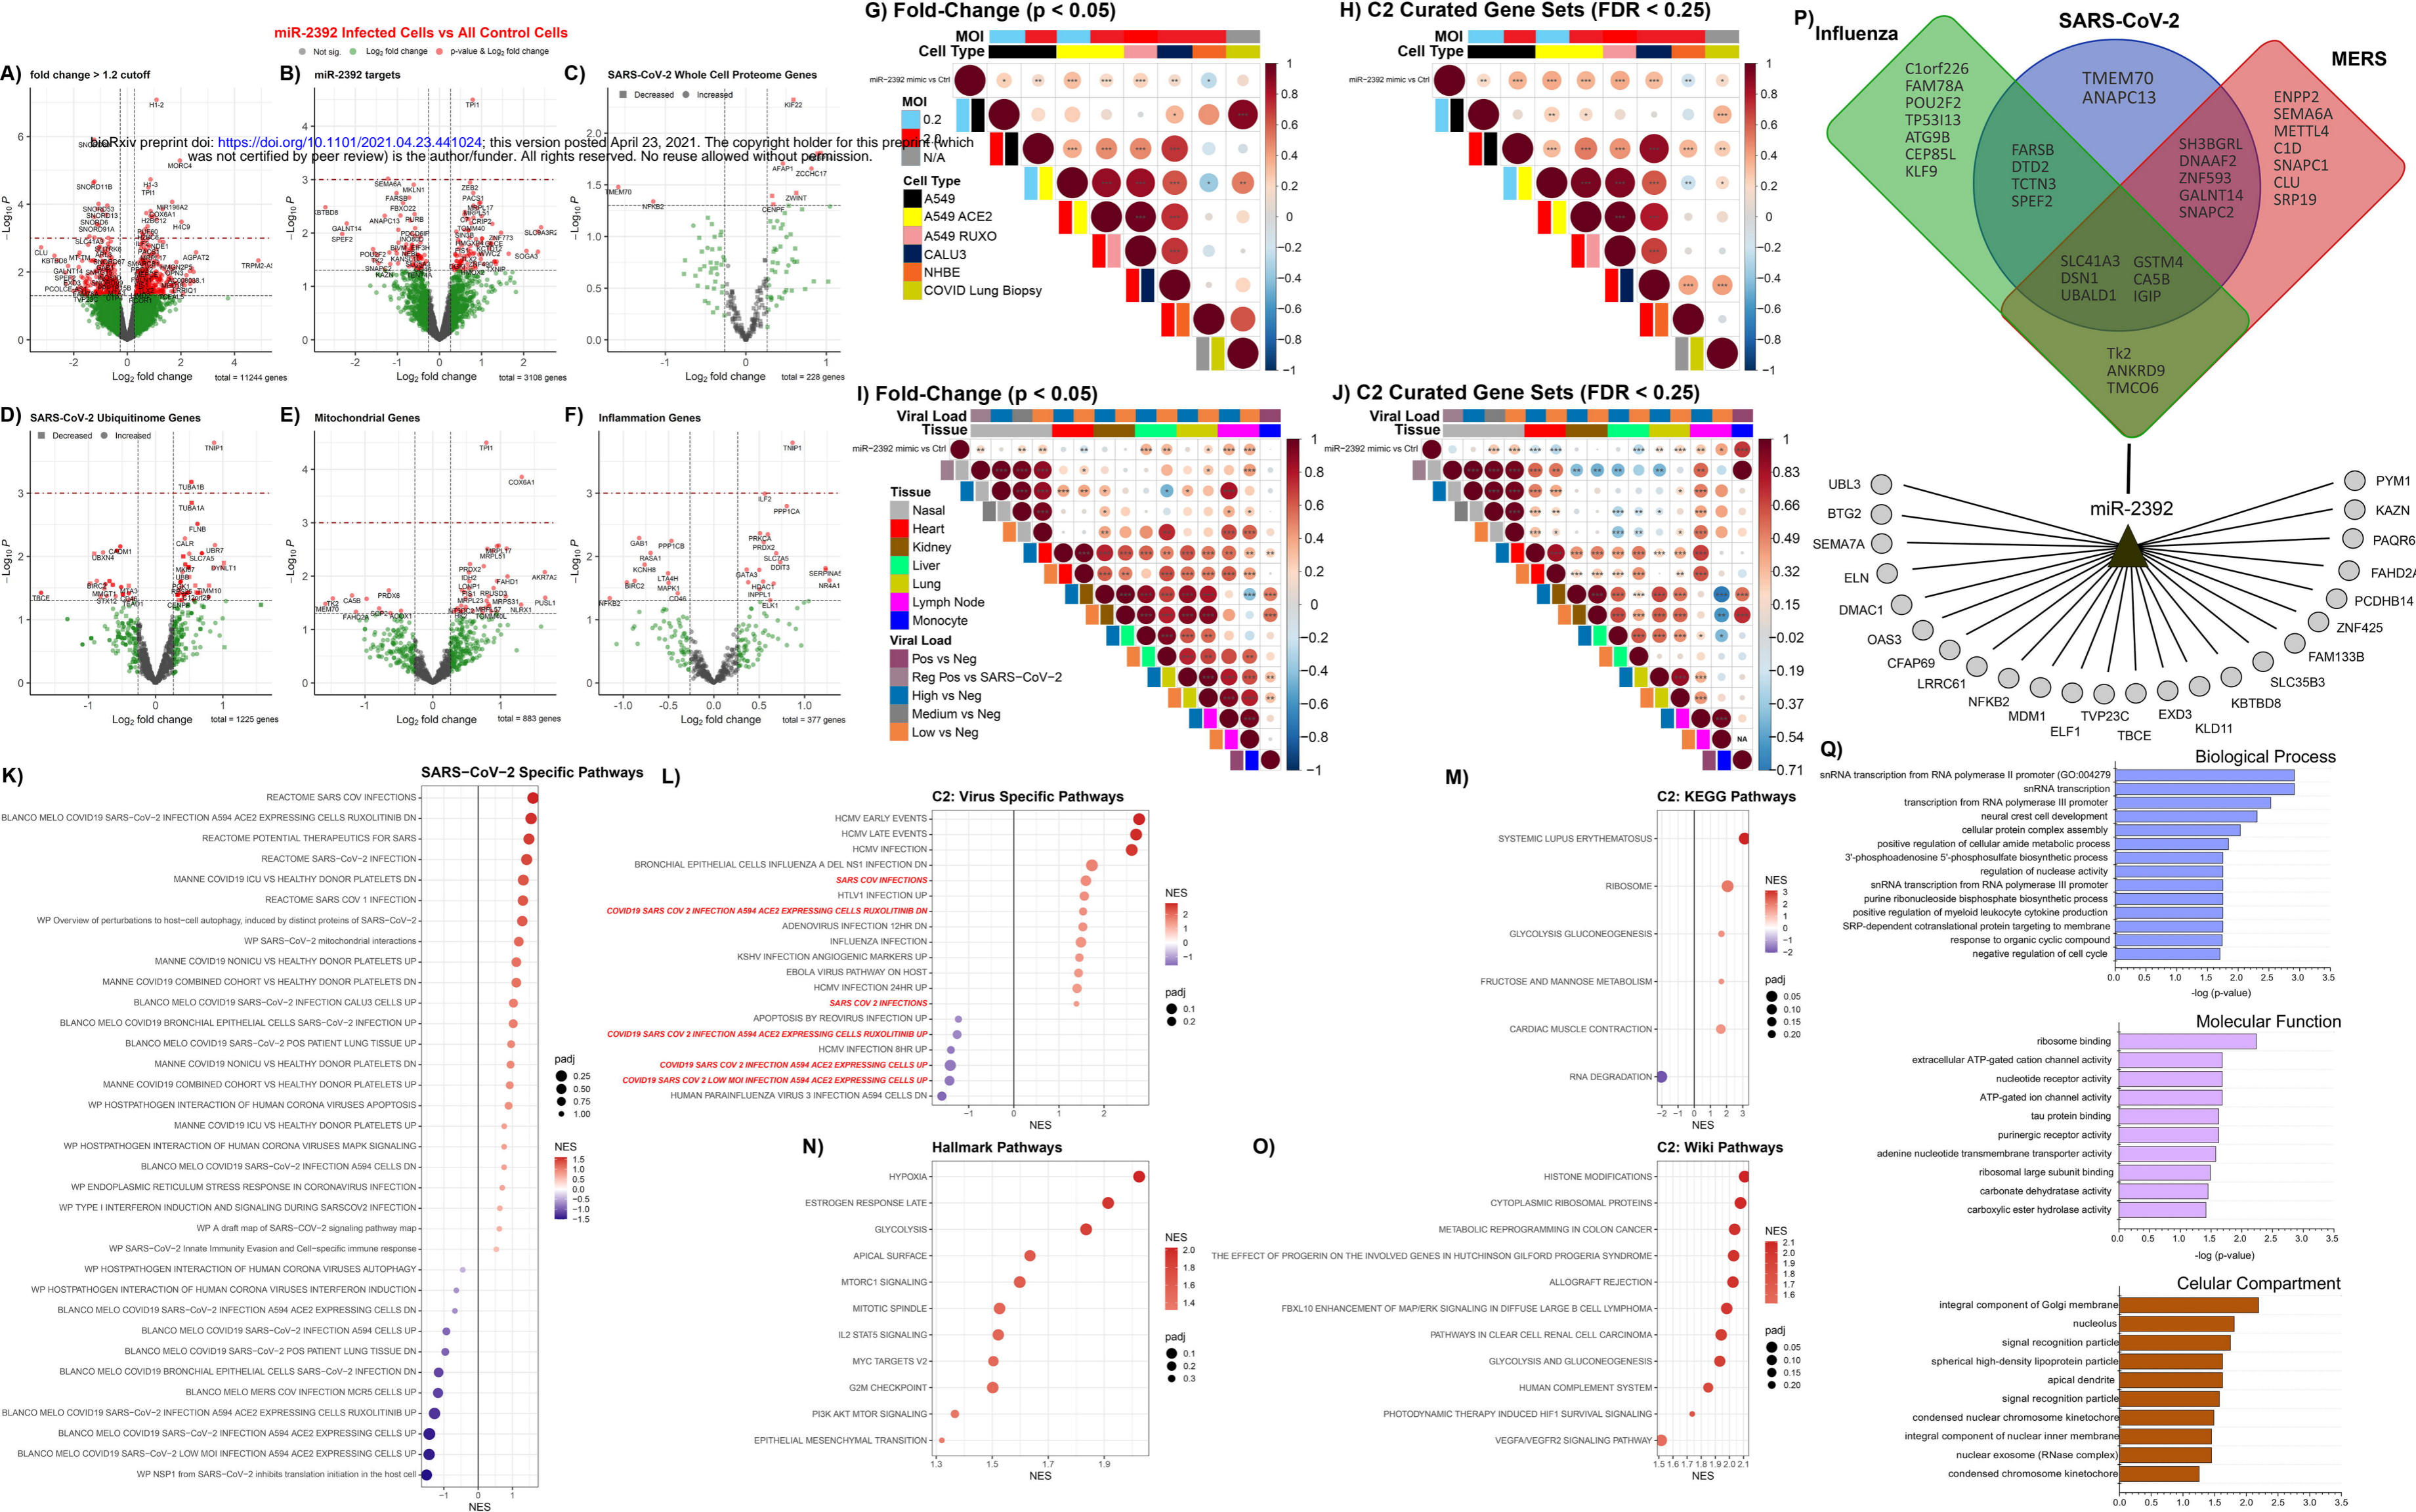

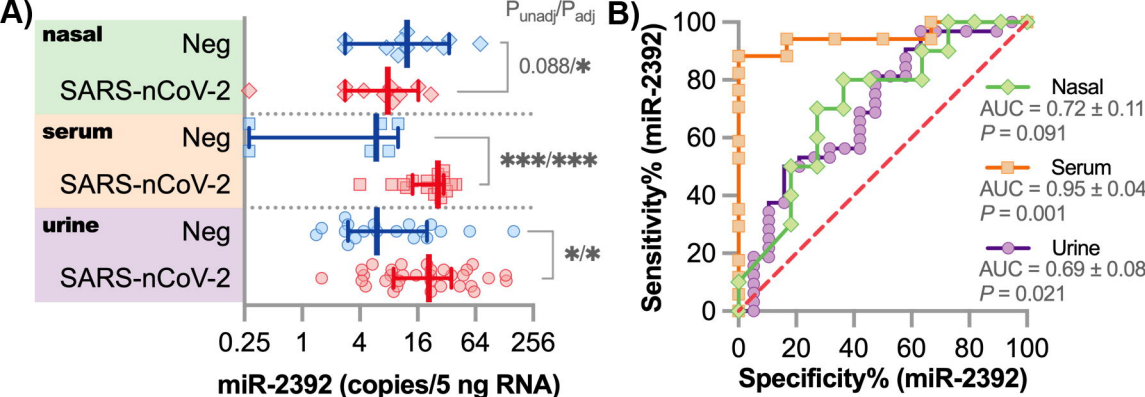

unadjusted = t-test on SARS (on log transformed values)  
 adjusted = mixed model corrected for age and sex (single terms)  
 \*, \*\*, \*\*\* =  $p < 0.05, 0.01, 0.001$

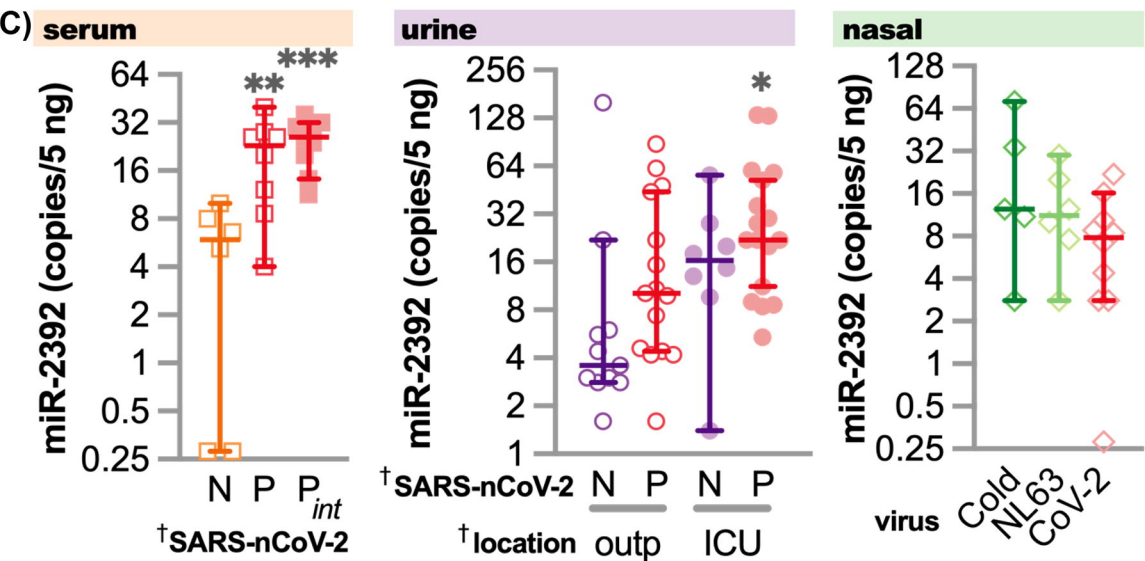

nasal and serum = ANOVA on log values

urine = 2-way ANOVA on log values

$\dagger, \ddagger = p < 0.05, 0.01$  from ANOVA

\*, \*\*, \*\*\* =  $p < 0.05, 0.01, 0.001$  from Dunnet's post-test compared to Negative

A)

## Design

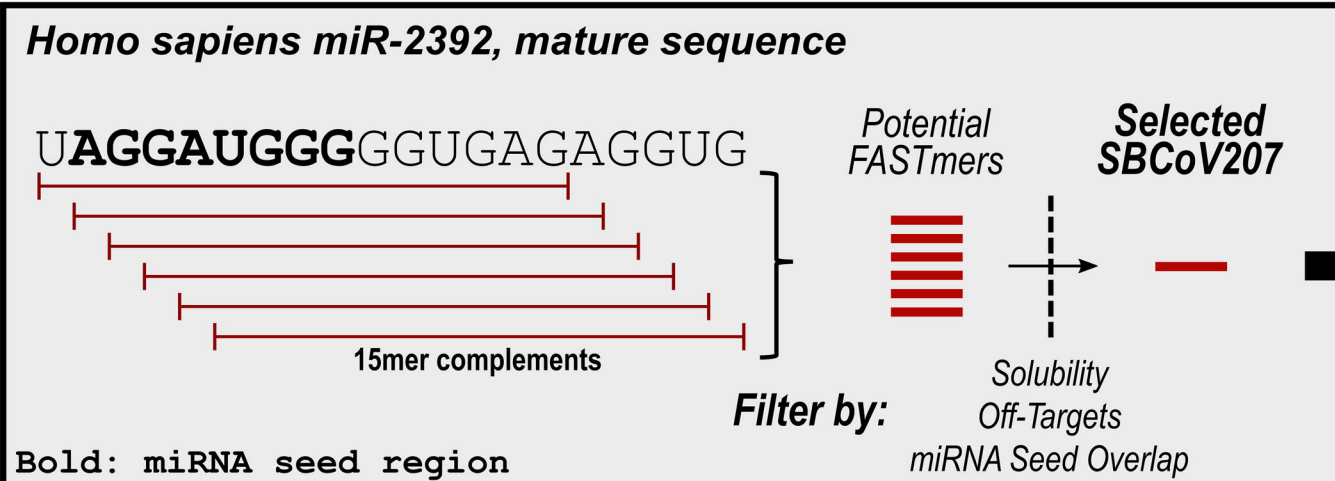

## Build

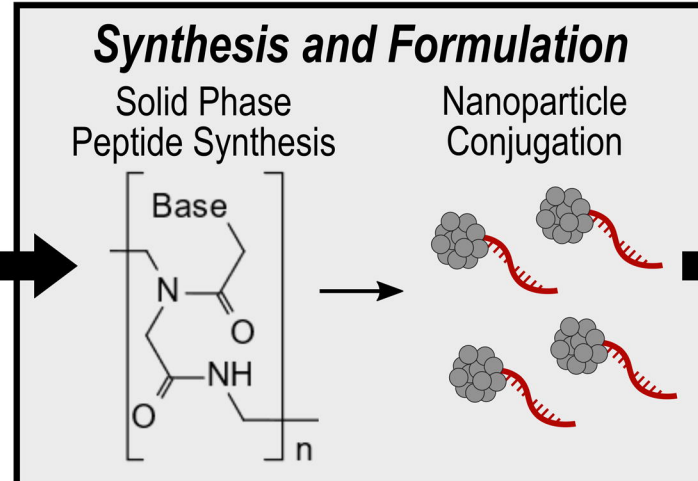

## Test

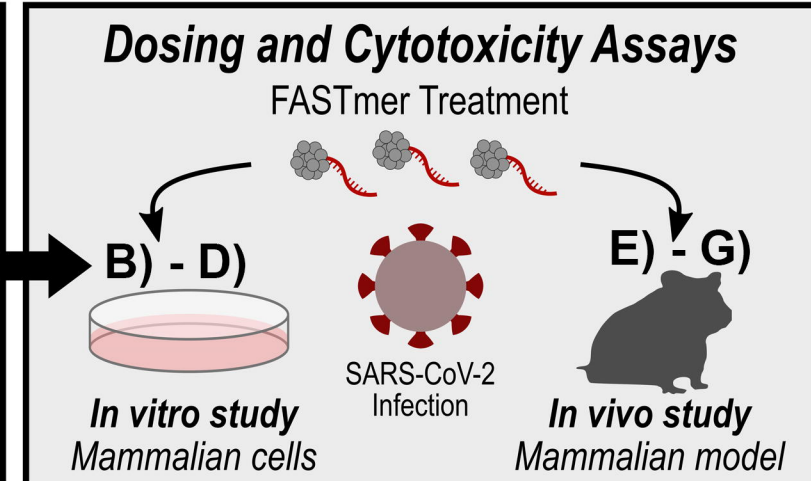

## anti-miR-2392 FASTmer Treatment

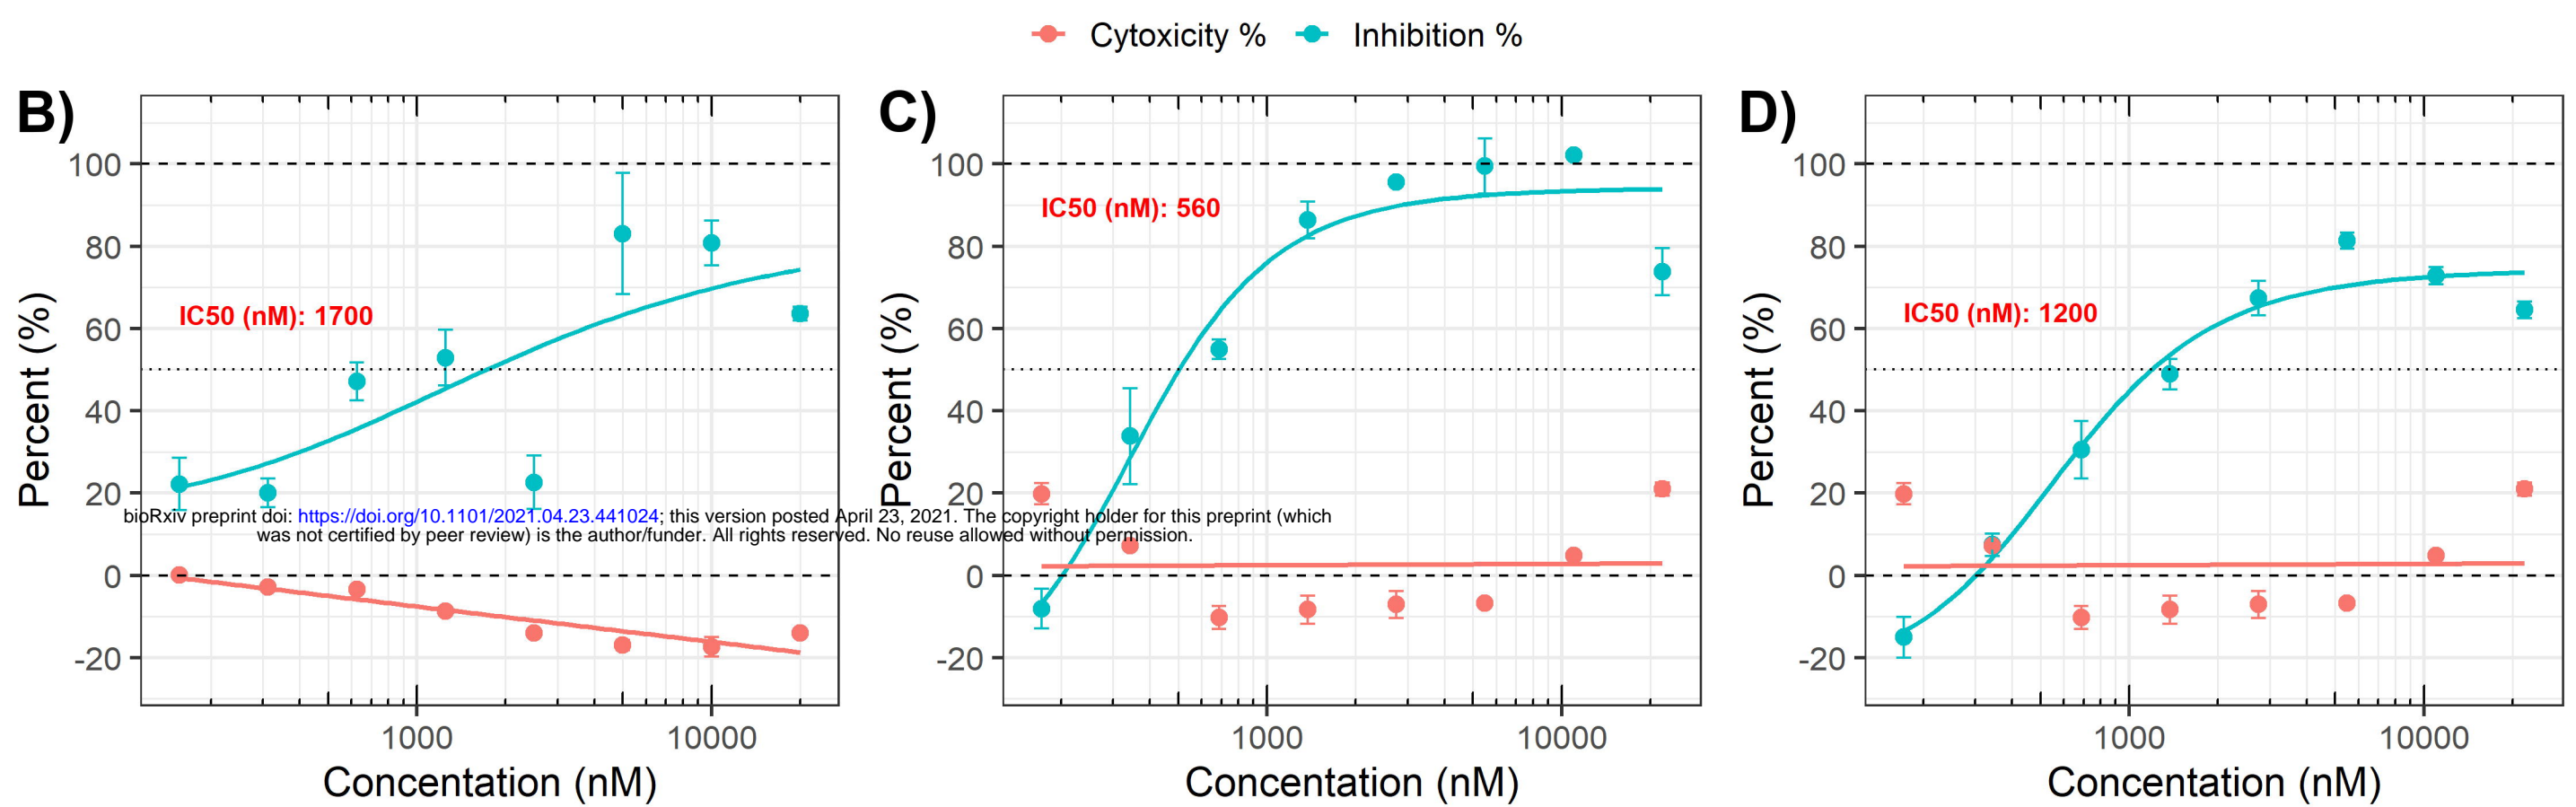

## Nonsense FASTmer Treatment in Human (A549) Cells

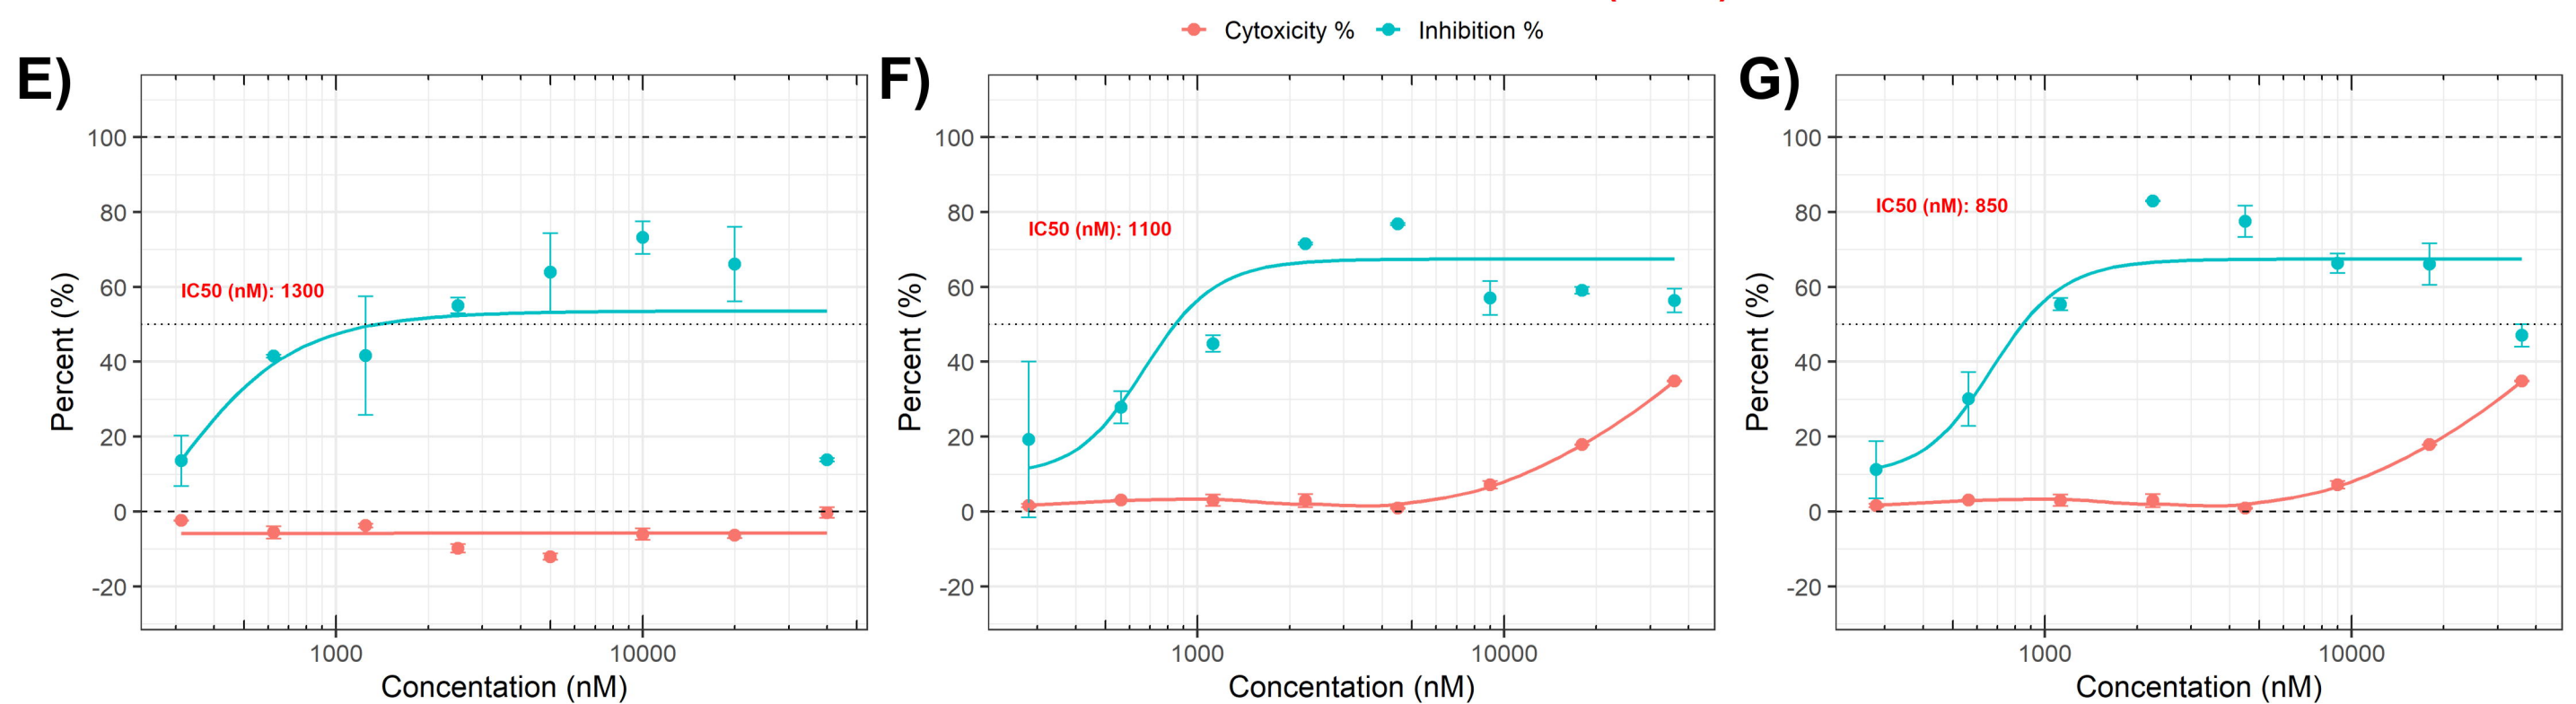

Treatment: IN Day -1, IN Days -1, +1, IP Day -1, IP Days -1, +1, PBS IN Days -1, +1

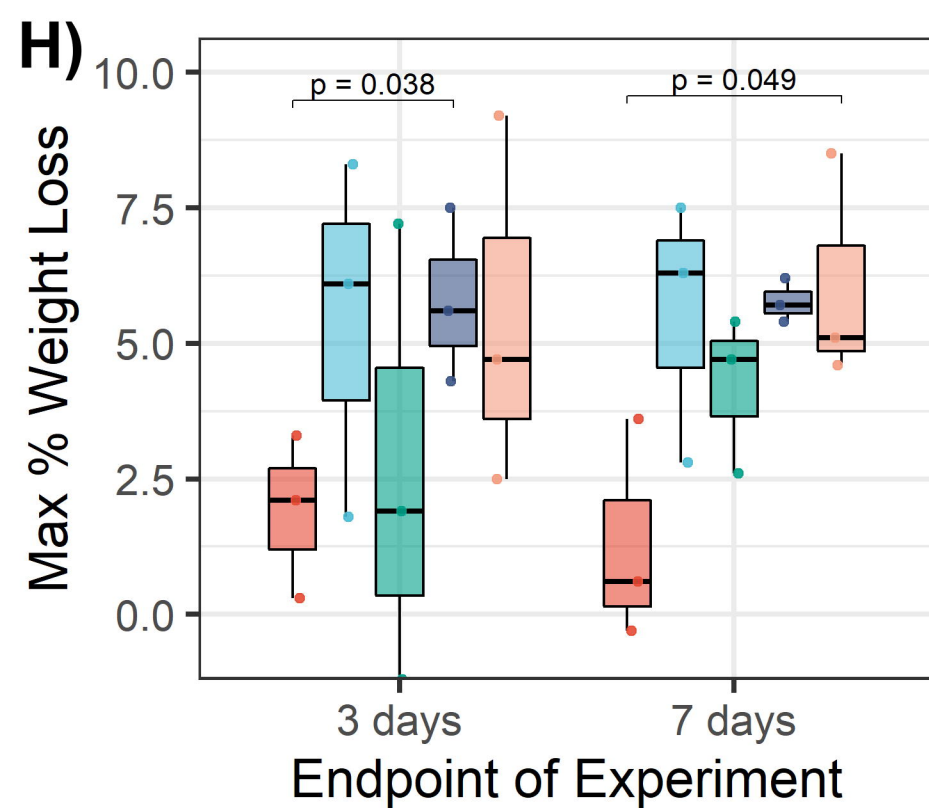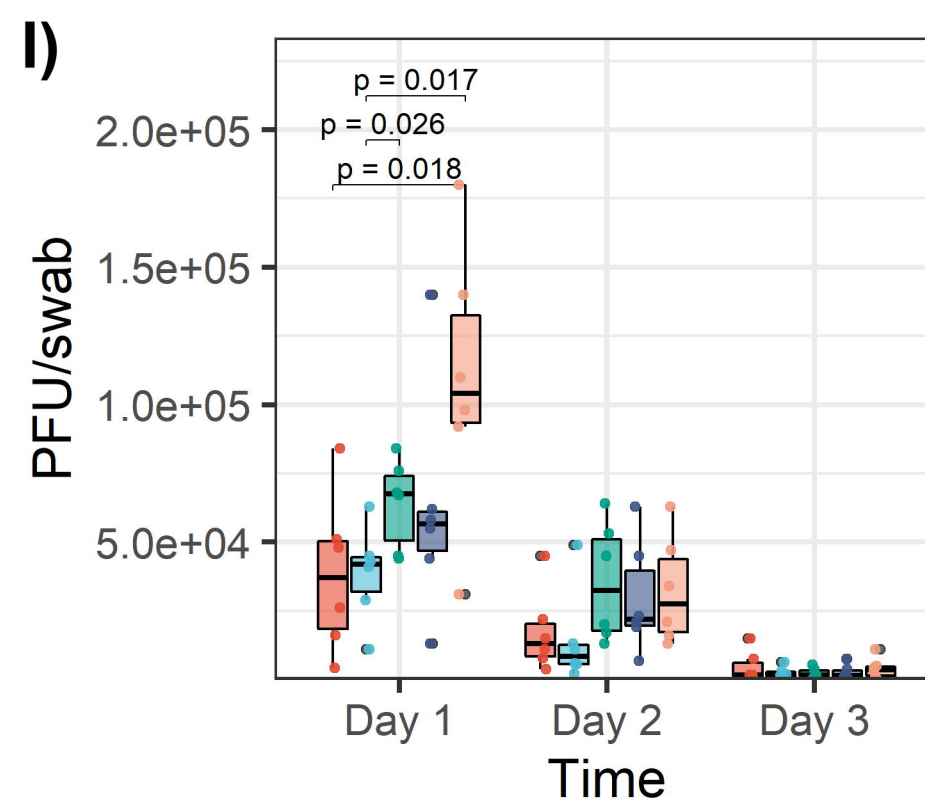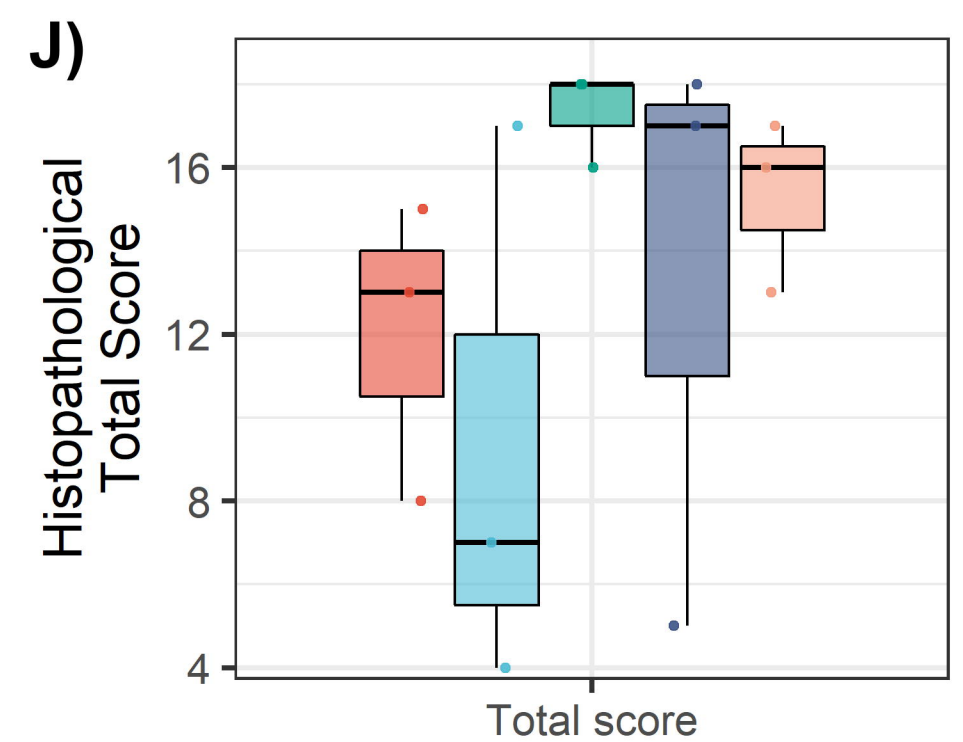

# A) miR-2392 Predicted Diseases

Total # of Genes  
 ● 50  
 ● 100

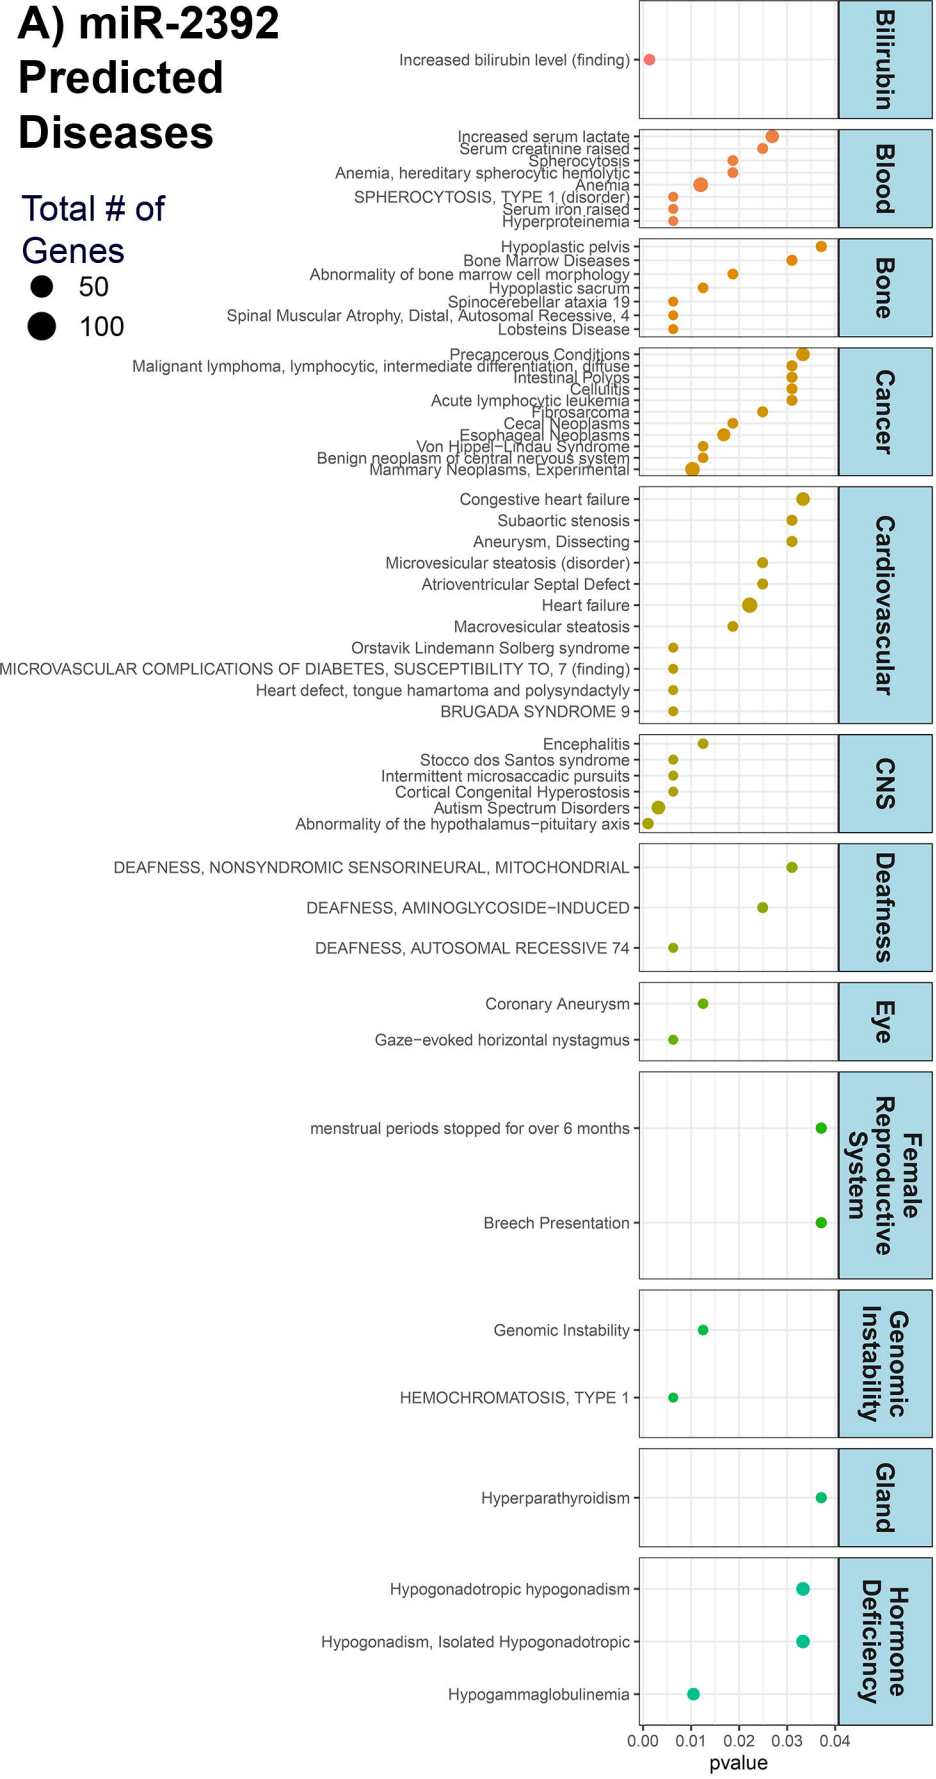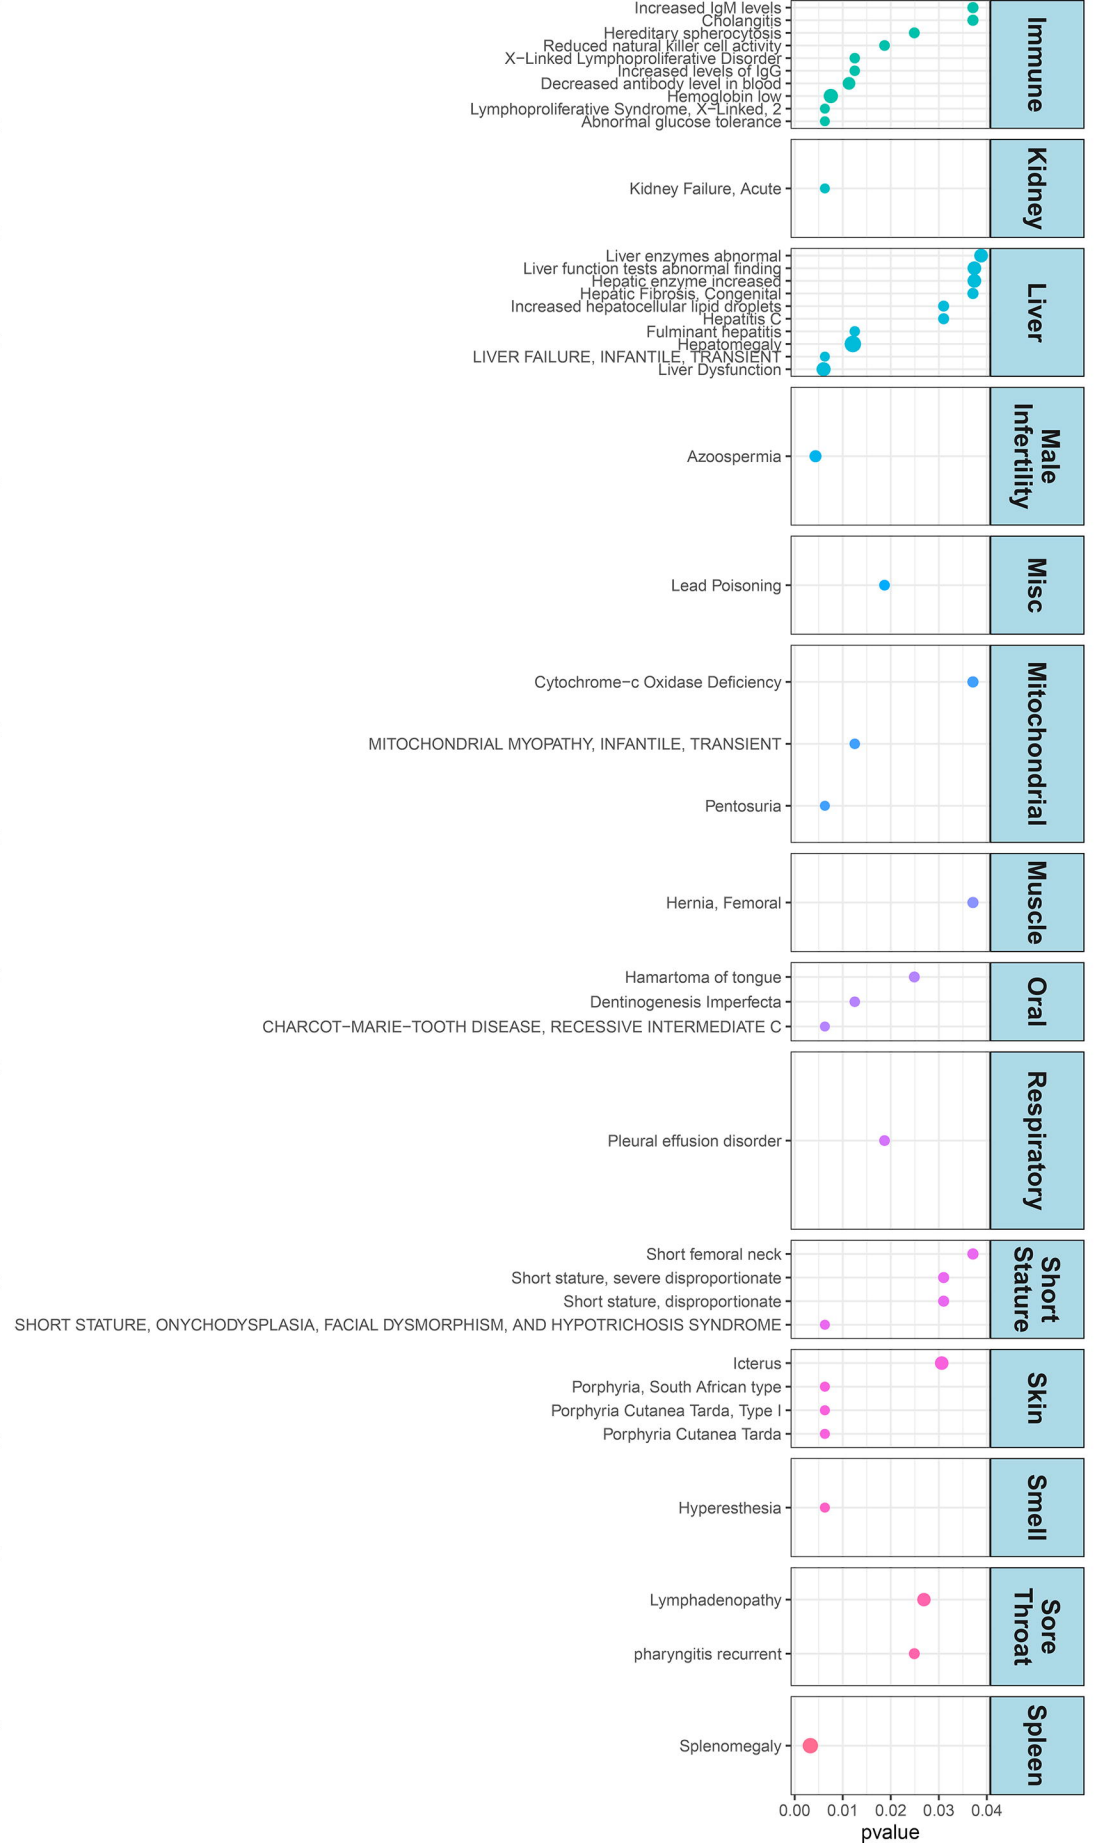

# B)

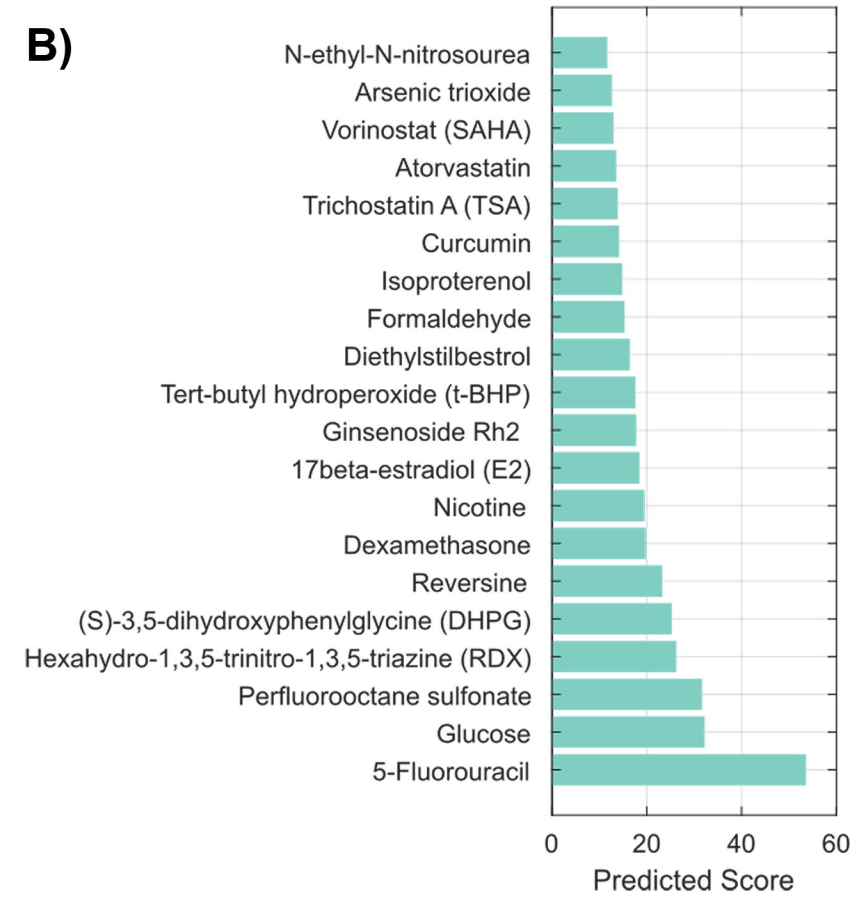

# C)

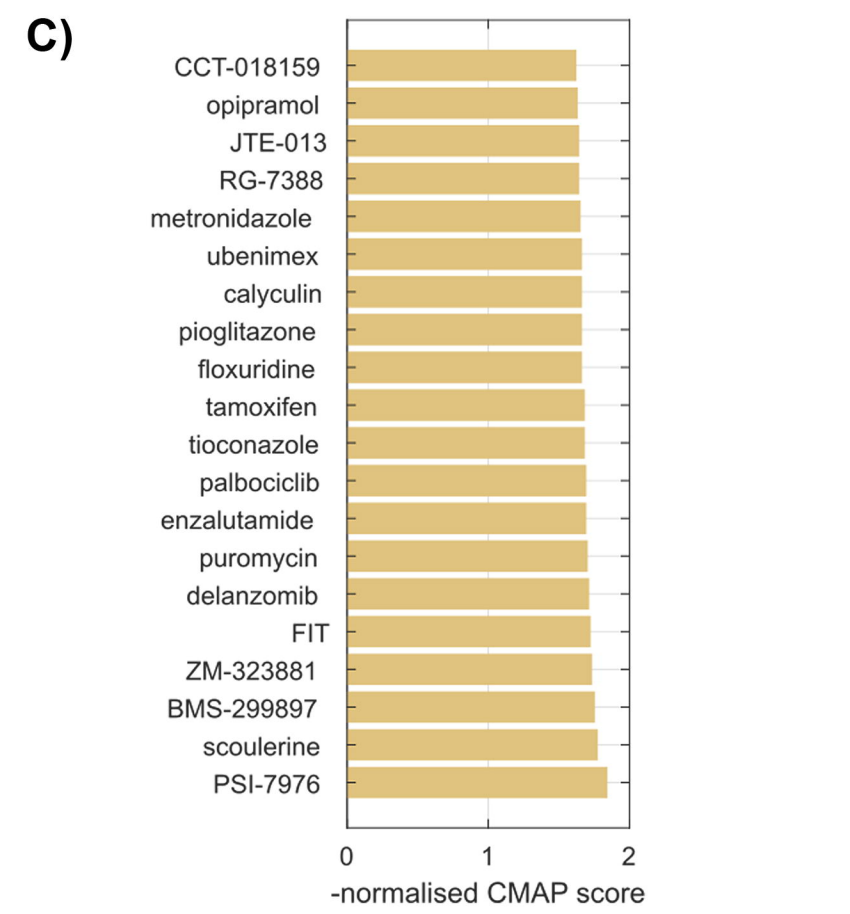

Source: https://www.biorxiv.org/content/10.1101/2021.04.23.441024v1.full.pdf
