## 1 **The Great Deceiver: miR-2392's Hidden Role in Driving SARS-CoV-2 Infection**

2 J. Tyson McDonald<sup>1,2</sup>, Francisco Javier Enguita<sup>1,3</sup>, Deanne Taylor<sup>1,4,5</sup>, Robert J. Griffin<sup>1,6</sup>,  
3 Waldemar Priebe<sup>1,7</sup>, Mark R. Emmett<sup>1,8</sup>, Marisa McGrath<sup>9</sup>, Mohammad M. Sajadi<sup>9</sup>, Anthony D.  
4 Harris<sup>10</sup>, Jean Clement<sup>9</sup>, Joseph M. Dybas<sup>1,4</sup>, Nukhet Aykin-Burns<sup>11</sup>, Joseph W. Guarnieri<sup>1,12</sup>,  
5 Larry N. Singh<sup>1,12</sup>, Peter Grabham<sup>1,13</sup>, Stephen B. Baylin<sup>1,14</sup>, Aliza Yousey<sup>1,15</sup>, Andrea N.  
6 Pearson<sup>15</sup>, Peter M. Corry<sup>1,6</sup>, Amanda Saravia-Butler<sup>1,16,17</sup>, Thomas R. Aunins<sup>18</sup>, Prashant  
7 Nagpal<sup>19,20,21</sup>, Cem Meydan<sup>22,23</sup>, Jonathan Foox<sup>22,23</sup>, Christopher Mozsary<sup>22,23</sup>, Bianca  
8 Cerqueira<sup>1,24,25</sup>, Viktorija Zaksas<sup>1,26</sup>, Urminder Singh<sup>1,27</sup>, Eve Syrkin Wurtele<sup>1,27</sup>, Sylvain V.  
9 Costes<sup>17</sup>, Diego Galeano<sup>1,28,29</sup>, Alberto Paccanaro<sup>1,28,30</sup>, Suzanne L. Meinig<sup>31</sup>, Robert S.  
10 Hagan<sup>31,32</sup>, Natalie M Bowman<sup>33</sup>, UNC COVID-19 Pathobiology Consortium<sup>34,35+</sup>, Matthew C.  
11 Wolfgang<sup>31,35</sup>, Selin Altinok<sup>36</sup>, Nicolae Sapoval<sup>1,37</sup>, Todd J. Treangen<sup>1,37</sup>, Matthew Frieman<sup>1,9</sup>,  
12 Charles Vanderburg<sup>38</sup>, Douglas C. Wallace<sup>1,12</sup>, Jonathan Schisler<sup>1,36</sup>, Christopher E.  
13 Mason<sup>1,22,23,39,40</sup>, Anushree Chatterjee<sup>1,18,19,20</sup>, Robert Meller<sup>1,15</sup>, Afshin Beheshti<sup>1,38,41,42,43\*</sup>

14  
15 <sup>1</sup>COVID-19 International Research Team

16 <sup>2</sup>Department of Radiation Medicine, Georgetown University School of Medicine, Washington  
17 D.C. 20007, USA

18 <sup>3</sup>Instituto de Medicina Molecular João Lobo Antunes, Faculdade de Medicina, Universidade de  
19 Lisboa, Av. Prof. Egas Moniz, 1649-028 Lisbon, Portugal

20 <sup>4</sup>Department of Biomedical and Health Informatics, The Children's Hospital of Philadelphia,  
21 Philadelphia, PA 19104 USA

22 <sup>5</sup>Department of Pediatrics, Perelman School of Medicine, University of Pennsylvania,  
23 Philadelphia, PA 19104 USA

24 <sup>6</sup>Radiation Biology Division, Dept of Radiation Oncology, University of Arkansas for Medical  
25 Sciences, Little Rock, AK, 72211 USA

26 <sup>7</sup>Department of Experimental Therapeutics, University of Texas MD Anderson Cancer Center,  
27 Houston, TX, 77030, USA

28 <sup>8</sup>Department of Biochemistry and Molecular Biology, University of Texas Medical Branch,  
29 Galveston, TX 77555, USA

30 <sup>9</sup>Institute of Human Virology, University of Maryland School of Medicine, Baltimore, MD,  
31 21201, USA

32 <sup>10</sup>Department of Epidemiology and Public Health, University of Maryland School of Medicine,  
33 Baltimore, MD, 21201, USA

34 <sup>11</sup>Division of Radiation Health, Department of Pharmaceutical Sciences, University of Arkansas  
35 for Medical Sciences, Little Rock, AK, 72211 USA

36 <sup>12</sup>Center for Mitochondrial and Epigenomic Medicine, Children's Hospital of Philadelphia,  
37 Philadelphia, PA 19104, USA

38 <sup>13</sup>Center for Radiological Research, Columbia University, New York, NY 10032, USA

39 <sup>14</sup>Department of Oncology, Sidney Kimmel Comprehensive Cancer Center, Johns Hopkins  
40 School of Medicine, Baltimore, MD 21287, USA

41 <sup>15</sup>Department of Neurobiology and Pharmacology, Morehouse School of Medicine, Atlanta, GA  
42 30310, USA

43 <sup>16</sup>Logyx, LLC, Mountain View, CA 94043, USA

44 <sup>17</sup>Space Biosciences Division, NASA Ames Research Center, Moffett Field, CA 94035, USA  
45 <sup>18</sup>Department of Chemical and Biological Engineering, University of Colorado Boulder,  
46 Boulder, CO, 80303, USA  
47 <sup>19</sup>Sachi Bioworks Inc, Boulder, CO, 80301, USA  
48 <sup>20</sup>Antimicrobial Regeneration Consortium, Boulder, CO, 80301, USA  
49 <sup>21</sup>Quantum Biology Inc, Boulder, CO, 80301, USA  
50 <sup>22</sup>Department of Physiology, Biophysics and Systems Biology, Weill Cornell Medicine, NY,  
51 10065, USA  
52 <sup>23</sup>The HRH Prince Alwaleed Bin Talal Bin Abdulaziz Alsaud Institute for Computational  
53 Biomedicine, Weill Cornell Medicine, NY, 10065, USA  
54 <sup>24</sup>KBR Space & Science, San Antonio, TX, 78235, USA  
55 <sup>25</sup>Aeromedical Neurology & Neuroimaging Research Group, United States Air Force School of  
56 Aerospace Medicine, Lackland AFB, TX, 78236, USA  
57 <sup>26</sup>Center for Translational Data Science, University of Chicago, Chicago, IL, 60615, USA  
58 <sup>27</sup>Bioinformatics and Computational Biology Program, Center for Metabolic Biology,  
59 Department of Genetics, Development and Cell Biology, Iowa State University, Ames, IA  
60 50011, USA  
61 <sup>28</sup>School of Applied Mathematics, Fundação Getulio Vargas, Rio de Janeiro, Brazil  
62 <sup>29</sup>Faculty of Engineering, National University of Asuncion, Central, Paraguay  
63 <sup>30</sup>Department of Computer Science, Centre for Systems and Synthetic Biology, Royal Holloway,  
64 University of London, Egham Hill, Egham, UK  
65 <sup>31</sup>Marsico Lung Institute, University of North Carolina at Chapel Hill, Chapel Hill, NC, 27599,  
66 USA  
67 <sup>32</sup>Division of Pulmonary Diseases and Critical Care Medicine, Department of Medicine,  
68 University of North Carolina, Chapel Hill, NC 27599, USA  
69 <sup>33</sup>Division of Infectious Disease, School of Medicine, University of North Carolina, Chapel Hill,  
70 NC, 27599, USA  
71 <sup>34</sup>Department of Oral and Craniofacial Health Sciences, UNC Adams School of Dentistry,  
72 University of North Carolina School of Medicine, Chapel Hill, NC, 27599, USA  
73 <sup>35</sup>Department of Microbiology & Immunology, University of North Carolina School of  
74 Medicine, Chapel Hill, NC, 27599, USA  
75 <sup>36</sup>McAllister Heart Institute, Department of Pharmacology, and Department of Pathology and  
76 Lab Medicine, The University of North Carolina at Chapel Hill, NC 27599, USA  
77 <sup>37</sup>Department of Computer Science, Rice University, Houston, TX 77005, USA  
78 <sup>38</sup>Stanley Center for Psychiatric Research, Broad Institute of MIT and Harvard, Cambridge, MA,  
79 02142, USA  
80 <sup>39</sup>New York Genome Center, NY, USA  
81 <sup>40</sup>The Feil Family Brain and Mind Research Institute, Weill Cornell Medicine, NY, 10065, USA  
82 <sup>41</sup>KBR, Space Biosciences Division, NASA Ames Research Center, Moffett Field, CA, 94035,  
83 USA  
84 <sup>42</sup>Senior author  
85 <sup>43</sup>Lead Contact  
86 +The full list of authors associated with the UNC COVID-19 Pathobiology Consortium is  
87 available in the supplemental information.

88 \*Correspondence: [afshin.beheshti@nasa.gov](mailto:afshin.beheshti@nasa.gov)

89

### 90 **Summary (150 words)**

91 MicroRNAs (miRNAs) are small non-coding RNAs involved in post-transcriptional gene  
92 regulation that have a major impact on many diseases and provides an exciting avenue towards  
93 antiviral therapeutics. From patient transcriptomic data, we have discovered a circulating  
94 miRNA, miR-2392, that is directly involved with SARS-CoV-2 machinery during host infection.  
95 Specifically, we found that miR-2392 was key in driving downstream suppression of  
96 mitochondrial gene expression, increasing inflammation, glycolysis, and hypoxia as well as  
97 promoting many symptoms associated with COVID-19 infection. We demonstrate miR-2392 is  
98 present in the blood and urine of COVID-19 patients tested, but not detected in COVID-19  
99 negative patients. These findings indicate the potential for developing a novel, minimally  
100 invasive, COVID-19 detection method. Lastly, using both *in vitro* human and *in vivo* hamster  
101 models, we have developed a novel miRNA-based antiviral therapeutic targeting miR-2392 that  
102 significantly reduces SARS-CoV-2 viability and may potentially inhibit a COVID-19 disease  
103 state in the host.

104

### 105 **Key words**

106 COVID-19, SARS-CoV-2, microRNA, miRNA, Facile Accelerated Specific Therapeutic  
107 (FAST), FASTmer, miR-2392, antiviral therapeutic

108

### 109 **Introduction**

110 In Fall of 2019, the zoonotic spillover event led to the first know human infection with the  
111 severe acute respiratory syndrome coronavirus 2 (SARS-CoV-2) and subsequent human-to-  
112 human transmission triggered a pandemic leading to a worldwide health crisis from the resulting  
113 disease, referred to as coronavirus disease 2019 (COVID-19) (Huang et al., 2020; Zhu et al.,  
114 2020). COVID-19 causes substantial pulmonary disease but can also cause systemic health risks  
115 from extrapulmonary manifestations. Its effects entangle the entire body including but not  
116 limited to the cardiovascular, gastrointestinal, and hematological systems that may lead to long  
117 lasting effects after the virus has left the body, known as PASC (post-acute sequela of COVID-  
118 19) (Carfi et al., 2020; Feng et al., 2020; Gupta et al., 2020; Jacobs et al., 2020). SARS-CoV-2 is  
119 classified as a member of the Coronaviridae family, a group of viruses with a enveloped positive-  
120 stranded RNA that has the ability to infect cross-species (V'Kovski et al., 2021). Currently, three  
121 novel vaccines have completed efficacy trials and have been approved for emergency use by the  
122 Food and Drug Administration (Baden et al., 2021; Polack et al., 2020; Sadoff et al., 2021).  
123 While these vaccines represent a favorable milestone, additional data is required to demonstrate  
124 the long-term effectiveness against SARS-CoV-2 and protection against new strains. To prevent  
125 an endemic, the complete global eradication of COVID-19 will require a wide majority of the  
126 world's population to be vaccinated to achieve herd immunity. Unfortunately, there will always  
127 be a portion of the population that will not get vaccinated. Therefore, additional strategies for  
128 antiviral therapeutic options against COVID-19 are particularly relevant and important to explore  
129 in order to treat severe illnesses and overcome this global pandemic. Currently the majority of  
130 antivirals are repurposed drugs utilized for other disease and have shown limited clinical

131 efficacy, such as remdesivir (Abdelrahman et al., 2021). This brings a needed urgency to develop  
132 antivirals specifically designed against SARS-CoV-2.

133 One potential avenue for an alternative antiviral agent is treatment against specific  
134 microRNAs (miRNAs) associated with SARS-CoV-2 infection and subsequent manifestation of  
135 COVID-19. MicroRNAs (miRNAs) are non-coding RNAs that are involved with regulation of  
136 post-transcriptional gene expression and can impact entire pathways related to viruses and  
137 diseases (Jiang et al., 2009; Trobaugh and Klimstra, 2017). Each miRNA can target multiple  
138 messenger RNAs (mRNAs) and taken together, miRNAs are predicted to regulate over half of  
139 the human transcriptome (Friedman et al., 2009). Recent evidence has shown different diseases,  
140 including COVID-19, leads to distinct complements of miRNAs in the blood (Mishra et al.,  
141 2020; Nersisyan et al., 2020; Portincasa et al., 2020; Sacar Demirci and Adan, 2020; Sardar et  
142 al., 2020; Teodori et al., 2020; Widiasta et al., 2020; Zhang et al., 2021). These circulating  
143 miRNAs are highly stable and have the potential to be used for minimally invasive novel  
144 detection, potential biomarkers, and therapeutic targets (Tribolet et al., 2020). Research on the  
145 interactions between miRNAs and viruses have revealed a multifaceted relationship.  
146 Specifically, viruses have been shown to avoid the immune response by leveraging cellular  
147 miRNAs to complete their replication cycle (Trobaugh and Klimstra, 2017). The following  
148 mechanisms are central to the interaction of viruses and miRNAs: 1) miRNA processing  
149 pathways can be blocked or inhibited by viruses interacting with key proteins such as Dicer and  
150 associated proteins, 2) viruses can sequester miRNAs resulting in dysregulation of specific target  
151 mRNAs, 3) viruses can utilize miRNAs to redirect regulatory pathways of other miRNA targets  
152 to provide survival advantages, and 4) viruses can directly encode miRNA precursors that are  
153 processed by the canonical miRNA cellular pathway and have well-defined functions to  
154 specifically target and regulate the viral replicative cycle (Schult et al., 2018; Trobaugh and  
155 Klimstra, 2017).

156 Here, we report on a miRNA, miR-2392, that may directly regulate and drive a COVID-19  
157 response. This miRNA was initially predicted from COVID-19 patient data that consisted of  
158 multiple miRNAs being suppressed/inhibited (miR-10, miR-10a-5p, miR-1-3p, miR-34a-5, miR-  
159 30c-5p, miR-29b-3p, miR-155-5p, and miR-124-3p) and one miRNA being upregulated (miR-  
160 2392). With further examination, we discovered miR-2392 to be a key miRNA involved with  
161 COVID-19 progression. Specifically, miR-2392 drives downstream suppression of mitochondria  
162 activity while increasing inflammation, glycolysis, and hypoxia. MiR-2392 upregulation was  
163 concomitant with symptoms associated with COVID-19 infection in the host. We found that  
164 miR-2392 was circulating in COVID-19 infected patients and increased as a function of viral  
165 load. Our results demonstrate that miR-2392 may be utilized as an effective biomarker of  
166 COVID-19. Furthermore, we have developed a miR-2392 inhibitor and provide evidence that its  
167 use reduces SARS-COV-2 viability in targeted viral screens with A549 cells and reduces the  
168 impact of infection in COVID-19 animal models. With further development this miR-2392  
169 inhibitor may represent an effective antiviral therapeutic towards inhibiting the virus and limiting  
170 a negative host response from COVID-19.

171

## 172 **Results**

173

174 *Identification of key miRNAs associated with COVID-19 infection*

175 Currently, the majority of the published literature associated with miRNAs and SARS-CoV-2  
176 is based on *in silico* predictions. To identify miRNAs that may be involved in driving COVID-19  
177 severity in the host, we first examined publicly available Bronchial Alveolar Lavage Fluid  
178 (BALF) RNA-sequencing (RNA-seq) data from 13 individuals. Differential gene expression was  
179 assessed using a 1.2-fold change in gene expression for p-values less than 0.01 revealing 42  
180 increased genes and 347 decreased genes, compared to controls. Using the upstream regulator  
181 analysis from the Ingenuity Pathway Analysis (IPA) knowledge database, the miRNAs from  
182 differentially expressed genes (FDR < 0.05) from COVID-19-positive patients were inferred.  
183 Eight miRNAs were predicted to drive significant changes in COVID-19 positive patients with  
184 the downregulation of seven miRNAs (miR-10, miR-1, miR-34a-5p, miR-30c-5p, miR-29b-3p,  
185 miR-124-3p, and miR-155-5p) and upregulation of a single miRNA, miR-2392 (**Fig. 1A**). Using  
186 IPA's downstream effects analysis to predict biological processes from the combined  
187 suppression of the seven miRNAs and the upregulation of miR-2392 resulted in increased  
188 inflammation, immune suppression, and suppression of mitochondrial activity in the BALF  
189 dataset (**Fig. 1B and 1C**).

190 In support of these findings, previous studies have shown alterations in specific miRNAs  
191 may directly impact viral infections. For example, upregulation of miR-10, miR-124, or miR-1  
192 have been shown to have antiviral roles during infection (Hu et al., 2020; Sardar et al., 2020;  
193 Yang et al., 2016). Interestingly, upregulation of miR-30 and miR-155 have been shown  
194 independently to provide suppression in other types of coronaviruses (Dickey et al., 2016; Ma et  
195 al., 2018). The one miRNA predicted to be upregulated in COVID-19 patients from the BALF  
196 data was miR-2392. Though limited, the existing literature on miR-2392 demonstrates it is  
197 related to mitochondrial suppression and increased glycolysis (Fan et al., 2019) and circulating  
198 factors related to negative health risks (Chen et al., 2013; Fan et al., 2019; Hou et al., 2019; Li et  
199 al., 2017; Park et al., 2014; Yang et al., 2019).

200 Pathway analysis was performed with targets and pathways for miR-2392 to determine its  
201 impact on the host when upregulated. We observed that the upregulation of miR-2392 in the  
202 RNA-seq dataset impacted many downstream targets and pathways related to negative health  
203 outcomes (**Fig. 1C**). In addition to mitochondrial suppression, we also predicted activation of  
204 factors related to reactive oxygen species (ROS). Alternatively, since it is known that miR-2392  
205 directly interacts with the mitochondrial DNA (mtDNA) to inhibit the levels of many of the  
206 mtDNA coded oxidative phosphorylation transcripts, this could be a compensatory response to  
207 the inhibition of mitochondrial bioenergetics.

208 Glycolytic pathways (**Fig. 1C**) are also upregulated in association with increased miR-2392.  
209 MiR-2392 drives both hexokinase 2 (HK2) and pyruvate kinase (PKM) which are both positive  
210 regulators of glycolysis. HK2 phosphorylates glucose to produce glucose-6-phosphate and is a  
211 primary regulator of glycolysis. HK2 further enhances GDP-glucose biosynthesis. GDP-glucose  
212 is a nucleotide sugar which an essential substrate for all glycosylation reactions (i.e.  
213 glycosylation of viral spike proteins). Pyruvate kinase is essential for the production of ATP in  
214 glycolysis as this enzyme catalyzes the transfer of the phosphate group from  
215 phosphoenolpyruvate to ADP to make ATP. The mechanism of how miR-2392 is driving these

216 pathways is not clearly understood, but one possibility could be due to the stabilization of  
217 glycolytic transcripts.

218 Overall, the miR-2392 observed upregulation of glycolysis and antiviral effects related to  
219 miR-2392 suppression are consistent with the recently documented role of glucose metabolism in  
220 the progression of viral infection and poor outcome of COVID-19 (Ardestani and Azizi, 2021). It  
221 is also consistent with the reported effects of suppression of glycolysis by inhibitors like the  
222 glucose analog, 2-deoxy-D-glucose (2-DG), that was shown to suppress SARS-CoV-2  
223 replication in *in vitro* models (Ardestani and Azizi, 2021; Bojkova et al., 2020; Codo et al.,  
224 2020). Interestingly, 2-DG is also 2-deoxy-D-mannose and as such can interfere with processes  
225 utilizing mannose, a monosaccharide that is *in vivo* produced from glucose. Mannose plays  
226 important roles in the glycosylation of specific proteins. Replacement of a mannose molecule by  
227 2-DG in the respective SARS-CoV-2 N-glycans or O-glycans might lead to their truncation and  
228 subsequently to the suppression of virus infectivity and proliferation. These and miR-2392 data  
229 clearly indicate that selective targeting of glucose metabolism might have significant impact on  
230 current and future SARS-CoV-2 pandemics.

231 Targets related to the goals of antioxidant N-acetyl cysteine (NAC) therapy are also observed  
232 to be upregulated. These include activated endothelial cell increasing their expression of  
233 numerous adhesion molecules, including intercellular adhesion molecule 1 (ICAM1), vascular  
234 cell adhesion molecule 1 (VCAM1), and E-selectin, which allow attachment of hematopoietic  
235 immune and non-immune cells to the endothelial surface, and thus, contribute to inflammation  
236 and activation of the coagulation cascade. Powerful antioxidants such as NAC counteract  
237 COVID19 infections by potentially suppressing viral replication via improving intracellular thiol  
238 redox ratio as a precursor for major thiol antioxidant glutathione (Ho and Douglas, 1992) and  
239 inhibiting the NF- $\kappa$ B pathway (Poppe et al., 2017). Inhibition of the NF- $\kappa$ B pathway has been  
240 shown to reduce inflammatory damage by altering the glutathione and glutathione disulfide ratio  
241 (Aykin-Burns et al., 2005; Griffin et al., 2003; Jia et al., 2010). Because NAC can also modulate  
242 oxidative burst and reduce cytokine storm without weakening the phagocytizing function of  
243 neutrophils (Allegra et al., 2002; Kharazmi et al., 1988; Sadowska et al., 2006), its use in  
244 COVID-19 patients as a single agent or in combination with other antioxidants are being  
245 conducted in clinical trials (Alamdari et al., 2020). A recent study has shown noteworthy  
246 benefits of NAC in patients with severe COVID-19 infection (Ibrahim et al., 2020). Major  
247 mechanisms proposed for these favorable patient outcomes were NAC's ability to reduce IL-6  
248 induced mitochondrial oxidative stress via Complex I inhibition as well as to prevent increased  
249 inflammation due to uncontrolled activation of mTORC1. These results were in line with the role  
250 of miR-2392 in reducing the activities of electron transport chain complexes and enhancing  
251 glycolysis, which is known to be induced by mTORC1 activation. The same study also  
252 speculated that NAC could inhibit SARS-CoV-2 binding to ACE2 by reducing disulfide bonds in  
253 its receptor-binding domain. Inflammatory pathways and others that are observed with COVID-  
254 19 infection were also seen to be activated downstream of miR-2392.

255  
256 *Conservation of miR-2392 between species and its predicted interactions with the SARS-CoV-2*  
257 *genome*

258 Viral miRNAs can play a role in interspecies transmission due to the high conservation of  
259 miRNAs among species and the ability of viruses to integrate miRNAs into its own genome  
260 (Sacar Demirci and Adan, 2020; Schult et al., 2018). In addition, such integration of miRNAs  
261 within the virus has been shown to assist viruses to replicate and evade the immune system  
262 (Islam and Islam, 2021). To determine if miR-2392 might be capable of driving the observed  
263 COVID-19 health risks and symptoms in the host, we analyzed the conservation of human miR-  
264 2392 across species and the integration of miR-2392 into the SARS-CoV-2 genome (**Fig. 2**).

265 The UCSC Genome Browser was utilized to determine the conservation of miR-2392 across  
266 different species (Kent et al., 2002). The mature 20 base-pair miR-2392 is derived from an 84  
267 base-pair region of the 3'-UTR in the long non-coding RNA (lncRNA) gene, maternally  
268 expressed 3 (MEG3) and located in an imprinted region DLK1-DIO3 that also contains three  
269 clusters for the expression of 51 additional miRNAs (**Fig. 2A and 2B**). A base wise evolutionary  
270 conservation comparison demonstrated that miR-2392 is highly conserved among non-human  
271 primates. In addition, conservation of miR-2392 is evident in dogs, cats, and ferrets, species  
272 known to be infected with SARS-CoV-2 while mice and rats, species not impacted by COVID-  
273 19 (Johansen et al., 2020), have poor conservation with miR-2392.

274 To determine the impact of miR-2392 on normal tissues, we studied the impact of miR-  
275 2392's host gene, MEG3, on normal tissues utilizing GTEx data (Consortium, 2020). For the  
276 majority of healthy tissues, MEG3 was either not detected or being expressed at low levels (**Fig.**  
277 **2B**). This can imply that miR-2392 does not seem to significantly affect normal tissues.

278 To explore potential binding sites for miR-2392, we used the miRanda software (Enright et  
279 al., 2003) to identify all potential binding sites with respect to the SARS-CoV-2 reference  
280 genome (Wuhan-Hu-1; NC045512.2) and representative genomes from lineages of concern. We  
281 found that the miR-2392 seeding region is heavily integrated within SARS-CoV-2 and conserved  
282 in different viral strains (**Fig. 2C**). The three best hits from the miRanda scores are located in the  
283 NSP2, NSP3, and E-genes. Notably, these regions were conserved among 6 variants and lineages  
284 of concern each represented by 14 recent genomes from the respective lineage available from the  
285 Global Initiative on Sharing All Influenza Data (GISAID, (Shu and McCauley, 2017)).

286

287 *MiR-2392 targets mitochondrial and inflammatory pathways associated with SARS-CoV-2*

288 To determine in more detail the specific impact of miR-2392 gene targets and pathways in  
289 COVID-19 patients, miR-2392 gene targets were retrieved from the miRmap database as  
290 predicted by base pairing with its seed-region (Vejnar and Zdobnov, 2012). This list was further  
291 refined by overlap found in several other miRNA databases including miRmap (Vejnar and  
292 Zdobnov, 2012), miRwalk (Dweep and Gretz, 2015), miRDB (Chen and Wang, 2020), miRnet  
293 (Chang et al., 2020b), and ClueGo (Bindea et al., 2009). We also included RNA-seq analysis of  
294 39 autopsy tissue samples from the heart, lung, kidney, liver, and lymph node of COVID-19-  
295 positive patients with high or low viral loads (Park et al., 2021). The refined list of miR-2392  
296 gene targets (consisting of 375 genes) was examined using volcano plots in all samples (**Fig. 3A-**  
297 **F**).

298 To better determine the systemic impact on miR-2392 gene targets in COVID-19, we  
299 performed pathway analysis from the nasopharyngeal swab samples in living donors with and  
300 without COVID-19 using the SARS-CoV-2 viral load as the independent variable (high,

301 medium, low, other virus). The miR-2392 gene targets are differentially expressed (FDR<0.05)  
302 in at least one comparison of COVID-19-positive patients or other detected virus and were found  
303 to separate into six distinct hierarchical clusters that were identified and annotated utilizing  
304 ShinyGO (Ge et al., 2020) to determine the major pathways altered (**Fig. 3G**). The majority of  
305 these upregulated miR-2392 targets are involved in immune and inflammatory pathways. The  
306 downregulated miR-2392 targets were involved in mitochondrial function, oxidative stress, cell  
307 cycle, developmental biology, and ubiquitin binding which are pathways recently associated with  
308 the SARS-CoV-2 infection process (Hemmat et al., 2021). This data demonstrates miR-2392  
309 may target several gene pathways related to perpetuating SARS-CoV-2 infection. For the  
310 majority of the tissues (excluding the lymph nodes), higher viral loads are associated with greater  
311 miR-2392 gene targets being regulated. Interestingly, the lymph nodes show an inverse  
312 relationship with viral loads compared to other tissues.

313 Because miR-2392 was recently shown to directly target the transcription of mitochondrial  
314 DNA genes (Fan et al., 2019), we evaluated the impact on expression of the mitochondrial miR-  
315 2392 targets in our datasets. Differentially expressed miR-2392 target mitochondrial genes were  
316 identified using the MitoCarta database (Rath et al., 2021) (**Fig. 3H**). This revealed 14 genes  
317 harboring miR-2392 seed sequences that were significantly dysregulated in the nasal and heart  
318 samples. In nasal samples, SLC25A28, mitoferrin which mediates mitochondrial iron transport,  
319 was strongly upregulated along with IBA57, which is involved in iron sulfur assembly. The  
320 mitochondrial outer membrane protein import complex subunit TOMM20, cytochrome c oxidase  
321 (complex IV) subunit COX6B1, and mitochondrial transcription factor COT-2 (NR2F2) were  
322 strongly down regulated. In the heart, the folate enzyme MTHFD2L (methylenetetrahydrofolate  
323 dehydrogenase) was up-regulated while all of the other nuclear-coded mitochondrial genes  
324 identified were down regulated. Downregulated heart mitochondrial genes included NDUFS5  
325 (complex I subunit), COX6B1 and COX10 (complex IV structural and assembly subunits),  
326 CKMT1A (mitochondrial creatine kinase), MRPL34 (subunit of the large subunit of the  
327 mitochondrial ribosome), COT-2 (NR2F2), AK4 and MSRB3 (adenylate kinase 4 and  
328 methionine-R-sulfoxide reductase which mitigate oxidative stress), MRS2 (magnesium  
329 transporter) and CLIC4 (chloride channel). The kidney showed mild upregulation of complex I  
330 and single methyl group metabolism, but down regulation of complex IV (COX10), regulatory  
331 factor (COT-2), and iron sulfur center protein (IBA57). Hence, SARS-CoV-2 seems to  
332 downregulate nuclear mitochondrial gene transcription in the more oxidative heart and kidney, as  
333 well as in nasal tissues.

334 Since inflammation is a key component of COVID-19 infection, we also overlaid the  
335 standard known inflammatory genes determined from Loza et al. (Loza et al., 2007) to the miR-  
336 2392 targets (**Fig. 3I**). The analysis reveals that, at the mRNA level, most of the complement  
337 pathway genes are upregulated in the tissue samples analyzed. These changes could be  
338 compensatory, as proteins encoded by the genes could be downregulated as a function of  
339 traditional miRNA effects. The responses reflect the importance of degrees of inflammation for  
340 mediation of disease severity in COVID-19 patients and a key modulatory role of miR-2392 in  
341 this context.

342 Proteomic and transcriptomic analysis on miR-2392 targets on blood from COVID patients  
343 utilizing COVIDome (Sullivan et al., 2021) revealed interesting patterns between RNA and



344 protein levels for miR-2392 targets (**Fig. 3J and 3K**). We utilized the miR-2392 gene targets  
345 only determined through miRmap to determine a broader relationship between the proteins and  
346 genes. Several miR-2392 targets in the tissue show a significant transcription increase in  
347 COVID-19-positive samples with small to no changes on the proteomics level: PLK1, CD38,  
348 PYCR1, RNASE1, BIRC5, RRM2, SIGLEC1 (**Fig. 3J**). Interestingly, all these genes were also  
349 positively regulated for the majority of tissues when considering only miR-2392 gene targets  
350 with miRmap (**Figs. S1 and S2**). In the blood, the miR-2392 targets CXCL10, STAT1, IFIT3,  
351 and C1QC were positively regulated at both the protein and gene levels. This upregulation was  
352 also observed in all other tissues (**Figs. S1 and S2**). We explored the correlation between RNA  
353 expression and protein abundance for miR-2392 targets in COVID-19 positive and negative  
354 samples (**Fig. 3K**). Pearson correlation in both sample types is very close, with a slightly  
355 stronger value in COVID-19 negative samples (negative samples  $\text{cor}=0.2089863$ ,  $\text{p-value}=4\text{e-}10$ ,  
356 positive samples  $\text{cor}=0.2053345$ ,  $\text{p-value}=8\text{e-}10$ ). Further investigation is needed to understand  
357 if increased levels of miR-2392 could potentially bind genes' mRNAs at a higher rate and  
358 therefore prevent translation to protein or if there are other mechanisms preventing mRNA  
359 translation to protein.

360

#### 361 *Overexpression of miR-2392 simulates a phenotype similar to COVID-19 infection*

362 To determine if the upregulation of miR-2392 alone would elicit effects similar to a COVID-  
363 19 infection, cells were treated with a miR-2392 mimic. Using RNA-seq data, there were 649  
364 genes with a fold-change greater than  $\pm 1.2$  and a p-value less than 0.05 (**Fig. 4A**). A number of  
365 these differentially expressed genes were predicted targets of miR-2392 (**Fig. 4B**). Of particular  
366 interest are differentially expressed genes in this model that are also dysregulated in SARS-CoV-  
367 2 infected cells. We analyzed whole cell proteome data from a human-derived cell culture model  
368 for a SARS-CoV-2 infection profile (Stukalov et al., 2021), and found 10 proteins that were  
369 significantly changed in abundance and were also altered with miR-2392 overexpression: KIF22,  
370 FKBP14, RAD51, AFAP1, ZCCHC17, ZWINT, MAGED1, CENPF, TMEM70, and NFKB2  
371 (**Fig. 4C**). Viral infection is associated with alterations in protein posttranslational modifications  
372 of cellular proteins, including ubiquitination. This phenomenon can occur by viral or host  
373 directed modifications. We analyzed the ubiquitinome of the human-derived cell culture model  
374 of SARS-CoV-2 infection and observed a number of proteins that were increased or decreased in  
375 normalized ubiquitin abundance and were also dysregulated genes by miR-2392 overexpression.  
376 Furthermore, we found miR-2392 overexpression impacted genes involved with mitochondria,  
377 and inflammation (**Fig. 4D-4F**).

378 To determine if there was a direct correlation between miR-2392 overexpression and SARS-  
379 CoV-2 infection, comparisons were made using gene expression fold-change values or overlap in  
380 statically significant curated gene sets from canonical pathways determined by our fGSEA  
381 analysis. Using previously published data from Blanco-Melo *et al.* (Blanco-Melo et al., 2020),  
382 showed there was a statistically significant and positive correlation of the miR-2392 treatment  
383 compared to both the A549 and Calu-3 cell culture models infected with SARS-CoV-2 (**Fig. 4G**  
384 **and 4H**) as well as in lung biopsies post-mortem from two COVID-19 positive patients (**Fig.**  
385 **4H**). Using nasal swab samples, a significant and positive correlation was determined between  
386 patients with medium- and low-viral loads compared to non-infected patients (**Fig. 4I and 4J**).

387 Further identification of miR-2392 correlation to SARS-CoV-2 infections was made using RNA-  
388 seq from multiple tissues (heart, kidney, liver, lymph node, and lung) obtained during autopsies  
389 of COVID-19 patients with high or low viral loads (**Fig. 4I-J**). There was a positive correlation  
390 to lung and lymph node tissues with miR-2392 expression. Interestingly, there was a significant  
391 and positive correlation to liver tissue when comparing gene fold-change values (**Fig. 4I**) but not  
392 fGSEA curated biological genesets (**Fig. 4J**). In contrast, a negative correlation to heart tissue  
393 was observed.

394 Statistically significant pathways that were enriched due to miR-2392 treatment were  
395 examined using fGSEA (**Fig. 4K-O**). It was observed that the miR-2392 treatment induced  
396 pathway response that was significantly related to SARS-CoV-2 pathways. One obvious  
397 relationship shows that the Reactome SARS-CoV-2 pathways were significantly activated for the  
398 miR-2392 treated cells compared to the controls (**Fig. 4K and 4L**). Significant Hallmark  
399 pathways (**Fig. 4N**) show distinct pathways that have been reported to be associated with  
400 COVID-19 in patients, such as upregulation of hypoxia (Herrmann et al., 2020), glycolysis  
401 (Ardestani and Azizi, 2021), and cell cycle pathways (Su et al., 2020). Interestingly, the KEGG  
402 pathway analysis (**Fig. 4M**) indicates the overexpression of miR-2392 treated highly upregulated  
403 systemic lupus erythematosus which has been reported to occur in COVID-19 patients and have  
404 shown similar pathologies due to the increase of inflammation (Zamani et al., 2021).

405 Lastly, we determined the impact of miR-2392 specific targets being downregulated in the  
406 cell lines after miR-2392 overexpression. A regulatory network was built by including the  
407 predicted miR-2392 targets in the microRNA Data Integration Portal (MIRDIP) that were also  
408 downregulated in the overexpression cell model as well as from the recently described consensus  
409 transcriptional regulatory networks in coronavirus infected cells (Ochsner et al., 2020) (**Fig. 4P**).  
410 The gene enrichment analysis of these putative miR-2392 targets showed the presence of GO-  
411 terms related with the RNA metabolism, transcription, ribosome activity and Golgi complex  
412 (**Fig. 4Q**).

413

#### 414 *Circulating miR-2392 and the suppression of other miRNAs in COVID-19 infected patients*

415 To demonstrate the presence of circulating miR-2392 in COVID-19 infected patients, we  
416 quantified the amount of miR-2392 by droplet digital PCR (ddPCR) in the serum, urine and  
417 nasopharyngeal swab samples (**Fig. 5**). For the serum there were ten COVID-19 positive  
418 intubated patients, ten COVID-19 positive patients (not intubated), and ten negative patients. For  
419 the urine samples there were 15 inpatient COVID-19 positive samples, 15 outpatient COVID-19  
420 positive samples, 10 inpatient COVID-19 negative samples, and 11 COVID-19 negative healthy  
421 donors. Lastly, we quantified nasopharyngeal swab samples from 10 COVID-19 positive patient  
422 samples, 6 common cold coronavirus positive patient samples (229E, HKU1, and OC43), and 6  
423 Respiratory Illness/Coronavirus NL63 positive patient samples. In addition, we also quantified  
424 three other miRNAs which we predicted to be inhibited by COVID-19 infection (**Fig. 1A**) which  
425 were: miR-1-3p (**Fig. S3**), miR-155-5p (**Fig. S4**), and miR-124-3p (**Fig. S5**).

426 We observed a statistically significant increase of miR-2392 in COVID-19 positive patients  
427 from both the serum and urine samples (**Fig. 5A**). In addition, Receiver Operating Characteristic  
428 (ROC) curve analysis revealed that miR-2392 is significantly associated with SARS-CoV-2  
429 infection in patients (**Fig. 5B**) in all tissues. Lastly, when dissecting the amounts of miR-2392

430 with specific conditions associated with infection, we observe that more severely affected  
431 patients (i.e. intubated patients or patients in ICU), had higher presence of miR-2392 (**Fig. 5C**).  
432 Interestingly, low levels miR-2392 appeared in the nasopharyngeal location with no significant  
433 differences occurring between seasonal coronavirus samples. Since we hypothesize that miR-  
434 2392 is a primary initiator for systemic impact of the infection, this might indicate that miR-2392  
435 does not strongly appear until the virus has established its presence in the body.

436 As mentioned above we also measured the quantity of miR-1-3p (**Fig. S3**), miR-155-5p (**Fig.**  
437 **S4**), and miR-124-3p (**Fig. S5**) and performed the same analysis. For miR-1-3p we observed  
438 significant suppression in the serum while no significant differences in the urine or  
439 nasopharyngeal samples (**Fig. S3**). MiR-1-3p is known to be beneficial for cardiovascular  
440 functions, with the inhibition of miR-1-3p leading to heart failure and heart disease (Condorelli  
441 et al., 2010). Similar response was observed for miR-155-5p with significant suppression in the  
442 serum while no significant differences in the urine or nasopharyngeal samples (**Fig. S4**). For  
443 miR-124-3p, we observed very low amounts (on average < 2 copies/5 ng RNA), for all  
444 conditions, which indicates that miR-124-3p is not circulating for any of the patients for any the  
445 conditions observed (**Fig. S5**). MiR-124-3p provides as an ideal miRNA negative control  
446 candidate for SARS-COV-2.

447

#### 448 *Inhibiting miR-2392: a novel antiviral COVID-19 therapeutic*

449 The link that we found between miR-2392 and COVID-19 infection prompted us to ask  
450 whether we could develop effective antivirals for COVID-19 by inhibiting miR-2392. We used  
451 the Facile Accelerated Specific Therapeutic (FAST) platform to develop an effective antisense-  
452 based therapeutic against human miR-2392 (Aunins et al., 2020; Eller et al., 2021), termed  
453 SBCov207, for the treatment of COVID-19 (**Fig. 6A**). The FAST platform combines the four  
454 essential modules of drug development cycle (design, build, test, and learn) to optimize  
455 therapeutics against any gene and species of interest in less than a week. The anti-miR-2392  
456 FASTmer was evaluated for efficacy and toxicity against a SARS-CoV-2 infection of the human  
457 lung cell line A549 (**Fig. 6B-D**). Treatment of uninfected A549 cells showed no cytotoxicity up  
458 to 20  $\mu\text{M}$ . The control nonsense FASTmer (SBCov208) showed no toxicity even up to 40  $\mu\text{M}$ .  
459 Treatment of A549 cells infected with SARS-CoV2 showed drastic improvement in cell viability  
460 with an average of 85% viral inhibition at 10  $\mu\text{M}$  (IC<sub>50</sub> of  $1.15 \pm 0.33 \mu\text{M}$ ). In contrast, the  
461 control nonsense FASTmer showed significantly lower viral suppression (**Fig. 6E-G**). Human  
462 cell line-based infection models reaffirm that the anti-miR-2392 (SBCov207) is effective in  
463 inhibiting SARS-CoV2, while not exhibiting toxicity at the concentrations tested.

464 In a separate *in vivo* model, the anti-miR-2392 FASTmer was evaluated in a Syrian hamster  
465 infection model (**Fig. 6H-J**). Initially six hamsters were treated with FASTmers for 72 hours  
466 without infection to observe any changes in animal behavior indicating toxicity. There were no  
467 observed changes in animal behavior indicating a lack of obvious toxicity. Following this study,  
468 30 male hamsters were divided into 5 treatment groups. The infected hamsters were given  $10^5$   
469 plaque forming units (pfu) of WA01/2020 strain of SARS-CoV-2 passaged twice in Vero E6  
470 cells from the original isolate obtained from BEI Resources. The anti-miR-2392 FASTmer  
471 treatment was given by intraperitoneal (IP) injection or intranasal (IN) instillation 24 hours  
472 before viral inoculation or both 24 hours before and 24 hours after viral inoculation. Each

473 FASTmer dose was at a concentration of 10  $\mu\text{M}$  in a 100  $\mu\text{L}$  volume (approximately 0.13  
474 mg/kg). Half of the hamsters in each group ( $n = 3$ ) were euthanized and necropsied on day 3 and  
475 7 post-infection respectively.

476 Loss of body weight of hamsters over the course of the experiment were  $<10\%$  in all groups  
477 and significantly different for the IN treatment one day before viral inoculation (compared to the  
478 control) and while statistical differences between other groups were not present (**Fig. 6H**). Virus  
479 titers from oropharyngeal swabs of hamsters receiving IN treatment were significantly lower ( $p =$   
480 0.018) than those from hamsters receiving FASTmers IP or PBS on day 1 post-challenge, but  
481 there were no differences among groups in magnitude of shedding on days 2 and 3 post-  
482 challenge (**Fig. 6I**). Although not statistically different than the control treatment, the data  
483 indicates a downward trend with FASTmer treatment (**Fig. 6J**). In addition, the total  
484 histopathological score for the IN was lower than the controls although not significant.

485

486 *The impact of miR-2392 on diseases, relationship to COVID-19 symptoms, and predicted FDA*  
487 *drugs to target miR-2392*

488 To predict whether miR-2392 might have a direct relationship to COVID-19 symptoms in the  
489 host, we determined the pathway and disease relevance of miR-2392 using miRnet (Chang et al.,  
490 2020b). Among the diseases predicted to be associated with miR-2392 were a surprising number  
491 of clinical observations present in individuals with COVID-19 infection (**Fig. 7A**). These include  
492 heart or cardiovascular disease and failure, both known to heavily contribute to morbidity and  
493 mortality in patients with COVID-19 (Nishiga et al., 2020), hyperesthesia (Krajewski et al.,  
494 2021), as well as less common COVID-19 symptoms, such as lymphadenopathy and pharyngitis  
495 related to sore throat (Edmonds et al., 2021; Walsh-Messinger et al., 2020), liver dysfunction  
496 (Portincasa et al., 2020), splenomegaly (Malik et al., 2020), CNS (Mahajan and Mason, 2021;  
497 Rodriguez et al., 2020) and kidney failure (Hultstrom et al., 2021).

498 It is interesting to note that miR-2392 was also predicted to affect diseases that appeared not  
499 to be associated with COVID-19 infection, but literature searches reveal these pathologies do  
500 occur in some COVID-19 patients. For example, azoospermia, which is linked to male infertility,  
501 has been shown to occur in some male patients (Younis et al., 2020). The menstrual cycle in  
502 females have been reported to be deregulated for months after COVID-19 infection (Li et al.,  
503 2021). Association with dental damage has also been observed in COVID-19 patients (Sirin and  
504 Ozelik, 2021), also deafness or hearing loss (Koumpa et al., 2020). We used the tool Kaplan-  
505 Meier Plotter (Nagy et al., 2018) to associate miR-2392 expression with pan-cancer patient  
506 survival (**Fig. S7**). We observed that the high expression of miR-2392 is generally related to poor  
507 prognosis with the majority of cancer types ( $p\text{-value} < 0.05$ ). If miR-2392 is associated with  
508 COVID-19, as we are hypothesizing, and is persistent after the virus clears the host, then the  
509 implications for the potential long-term impact on the millions of people infected with COVID-  
510 19 could be devastating. Intriguingly, one of the miR-2392 predicted consequences in the  
511 immune category is decreased antibody levels in the blood; this might account for the reported  
512 loss of the antibodies overtime (Gudbjartsson et al., 2020; Self et al., 2020).

513 Using computational prediction models, we also predicted small molecules, including FDA-  
514 approved drugs that could inhibit miR-2392 from two different approaches. The first approach  
515 employed a state-of-the-art machine learning method that we recently developed for predicting

516 missing drug targets (Galeano et al., 2021). We applied this algorithm on an association dataset  
517 between 213 small molecules and 1,519 miRNAs from the SM2miR database (Liu et al., 2013)  
518 (see statistics in **Fig. S8**). Our model also integrated chemical similarity between small  
519 molecules and sequence similarity between miRNAs. In ten-fold cross-validation experiments,  
520 we achieved an average area under the receiver operating curve of 0.877 when predicting  
521 missing small molecule-miRNA associations (**Fig. S9**). A list of the top-20 predicted small  
522 molecules for miR-2392 (**Fig. 7B**) includes Dexamethasone, the first drug known to save lives in  
523 critically ill COVID-19 patients (Ledford, 2020), and Atorvastatin, that has shown similar  
524 protective role in COVID-19 patients (Rossi et al., 2020). The second approach follows ideas  
525 first presented in Sirota *et al.* (Sirota et al., 2011) and consists on analyzing the genomic signature  
526 of miR-2392 (*i.e.* significant up and down-regulated genes) and predicting small molecules that  
527 can reverse it. We screened the genomic signature of miR-2392 against the genomic signature of  
528 30,000 small molecules contained in the connectivity map (CMAP) (Lamb et al., 2006). The top-  
529 20 small molecules predicted by our approach (Sirota et al., 2011) includes the androgen receptor  
530 antagonist Enzalutamide and the insulin sensitizer Pioglitazone (Carboni et al., 2020) both of  
531 which are in clinical trials for COVID-19 (**Fig. 7C**; Clinical Trial #NCT04475601 and  
532 NCT04604223). We also found literature evidence for the leukotriene inhibitor ubenimex (Asai  
533 et al., 2020), and the bacterial DNA inhibitor metronidazole (Gharebaghi et al., 2020).

534

## 535 **Discussion**

536 While the potential eradication of the novel coronavirus through worldwide vaccination is  
537 underway, there remains a major need to develop effective interventional strategies to minimize  
538 the damage caused by coronavirus infections. Host-mediated lung inflammation is a driver of  
539 mortality in COVID-19 critically ill patients. Thus, it is logical to focus on therapeutics that may  
540 have immunomodulating properties or disrupt viral replication. Our research uncovers a novel  
541 eight miRNA signature in patients with COVID-19 viral loads compared to those without disease  
542 as predicted from RNA-seq data. The expression of seven miRNAs was decreased (miR-10,  
543 miR-1, miR-34a-5p, miR-30c-5p, miR-29b-3p, miR-124-3p, and miR-155-5p) while a single  
544 miRNA, miR-2392, was significantly increased (**Fig. 1**). This key miRNA signature was  
545 involved in major cellular and molecular mechanisms that drives the viral-host response.

546 From previous research, the upregulation of miR-10a-5p, from the miR-10 precursor  
547 miRNA, provides antiviral benefits through the suppression of SDC1 that can act as a defense  
548 mechanism for Porcine hemagglutinating encephalomyelitis viruses (Hu et al., 2020). The  
549 upregulation of miR-124 is shown to inhibit the Japanese encephalitis virus replication (Yang et  
550 al., 2016). Notably, the upregulation of miR-30c-5p and miR-155-5p have been independently  
551 shown to be involved with antiviral functions through immune and inflammatory pathways with  
552 other type of coronaviruses (Dickey et al., 2016; Ma et al., 2018). It was also indicated that  
553 inhibition of miR-34a-5p in the host by SARS-CoV-2 suppresses beneficial antiviral pathways  
554 that this miRNA regulates. (Bartoszewski et al., 2020; Sacar Demirci and Adan, 2020). miR-1-3p  
555 has previously been identified as an antiviral agent for viral related respiratory diseases and the  
556 downregulation by SARS-CoV-2 is predicted to follow similar pathways for survival in the host  
557 (Sardar et al., 2020). Examination of patients with COVID-19 showed increased levels of miR-  
558 2392 circulating blood (**Fig. 5**). Interestingly, we show that for both miR-1-3p and miR-155-5p

559 from serum patient samples were significantly inhibited (**Figs. S3 and S4**), which is in  
560 agreement with the current viral literature as discussed above. MiR-124-3p was shown to have  
561 no significant changes and barely present for SARS-CoV-2 patients (**Fig. S5**), indicating the  
562 responses discussed above is potentially specific for Japanese encephalitis virus.

563 Several studies have measured differential expression of miRNAs in COVID-19 patients and  
564 proposed their use as biomarkers or therapeutics. A post-mortem examination from lung biopsies  
565 in nine COVID-19 patients compared to controls found miR-26a, miR-29b, and miR-34a were  
566 correlated to endothelial dysfunction and inflammatory biomarkers (Centa et al., 2020). In a  
567 separate study performing multi-transcriptome sequencing in red blood cell depleted whole  
568 blood from moderate or severe COVID-19 patients four additional miRNAs, miR-146a, miR-21,  
569 miR-142, and miR-15b, were identified as potential biomarkers as well as contributors to disease  
570 pathogenesis (Tang et al., 2020). It has also been suggested to use miRNAs to target the  
571 angiotensin-converting enzyme 2 (ACE2) receptor that facilitates endocytosis of viral particles  
572 into the cells to limit virus-induced glomerular injury, cell infection, kidney damage (Mishra et  
573 al., 2020; Nersisyan et al., 2020; Pontecorvi et al., 2020; Sacar Demirci and Adan, 2020; Sardar  
574 et al., 2020; Teodori et al., 2020; Widiasta et al., 2020). While these studies are limited to a  
575 specific tissue, our data that correlates miRNA signatures from multiple tissues (**Fig. 3**) suggests  
576 miR-2392 is a unique target that is ubiquitously involved in COVID-19 symptoms.

577 In 2010, miR-2392 was found in a small-RNA deep-sequencing of normal and malignant  
578 human B-cells where it was altered among hundreds of other microRNAs (Jima et al., 2010).  
579 Since then, the majority of publications with miR-2392 are focused on cancer tissues and have  
580 found a potential role for miR-2392 in driving cellular invasion and metastasis through an  
581 epithelial-mesenchymal transition. In 2013, miR-2392 was one of 6 circulating microRNAs  
582 altered in the serum and tissue of patients with cervical squamous cell carcinoma that was used  
583 to predict the occurrence of lymph node metastasis with the potential to assist in clinical staging  
584 (Chen et al., 2013). Higher levels of miR-2392 in gastric cancer was found to be associated with  
585 lower clinical staging and increased patient survival (Li et al., 2017). It was shown that miR-  
586 2392 inhibited gastric cell invasion and metastasis by targeting MAML3 and WHSC1 for  
587 degradation that subsequently decreased an epithelial-mesenchymal transition through the loss of  
588 Snail1, Slug, and Twist1 expression. Similarly, miR-2392 and miR-1587 were found to target the  
589 ZEB2 protein, a promoter of the epithelial-mesenchymal transition. A lower expression of these  
590 two miRNAs were found in human keloid tissues that resulted in a loss of inhibition of ZEB2  
591 and subsequent promotion of cellular proliferation and invasion in keloids (Hou et al., 2019).  
592 Inhibition of miR-2392 by the long-non-coding RNA CACNA1G-AS1 was found to promote  
593 hepatocellular carcinoma through disrupting the degradation of C1orf61, a tumor activator  
594 associated with metastasis and tumor progression (Hu et al., 2013; Yang et al., 2019). Recently,  
595 Fan et al. demonstrated a novel role for miR-2392 in the regulation of chemoresistance in tongue  
596 squamous cell carcinoma by partial inhibition of mitochondrial DNA (mtDNA) transcription  
597 through direct miRNA-mtDNA base pairing which resulted in reprogramming tumor cell  
598 metabolism (Fan et al., 2019). These reports for miR-2392 establish the significant impact this  
599 single miRNA may have in on cellular activity. Particularly relevant to this study was the altered  
600 expression of miR-2392 found in Hepatitis B viral infections. Its expression was found to be  
601 increased by more than 2-fold in extracellular vesicles secreted from human hepatocytes infected

602 with the Hepatitis B virus (Enomoto et al., 2017). While miR-2392 has a reported impact on  
603 tumor cell biology, our study expands the valuable therapeutic potential of targeting miR-2392 to  
604 subsequently decrease SARS-CoV-2 viral infections (**Fig. 6**). These results warrant further  
605 exploration of the mechanistic underpinnings for the role of miR-2392 in driving viral infection.

606 One therapeutic insight deduced from miR-2392 interactions is the importance of the  
607 mitochondrial oxidative phosphorylation (OXPHOS) and glycolytic pathways in COVID-19,  
608 dramatically highlighted in BALF samples reported in **Fig. 1C**. In a study of tongue squamous  
609 cell carcinoma (Fan et al., 2019) it was reported that miR-2392 enters the mitochondrion where it  
610 binds to Ago2 and then binds to nucleotides 4379 to 4401 in the mtDNA heavy (H) strand. This  
611 binding site is within the MT-TQ (tRNA glutamine) gene, which encompasses nucleotides  
612 m.4329-4400. MT-TQ is part of a large polycistronic transcript transcribed from the H-strand  
613 promoter. This transcript encompasses 12 of the mtDNA H strand polypeptide genes punctuated  
614 by tRNAs. Cleavage of the tRNAs releases the mRNAs. Up-stream of TM-TQ are the 12S and  
615 16S rRNAs and the complex I gene MT-ND1 gene. Downstream of MT-TQ is MT-ND2, MT-  
616 CO1, MT-CO2, MT-ATP6/8, MT-ND3, MT-ND4L, MT-ND4, MT-ND5, and MT-CYB (Lott et  
617 al., 2013; Wallace, 2018). Strikingly, the down-regulated mtDNA genes from the BALFS are the  
618 complex IV (cytochrome c oxidase) genes MT-CO1 and MT-CO2, the complex III (the bc<sub>1</sub>  
619 complex) gene (MT-CYB), and the complex I genes (MT-ND2, MT-ND4, and MT-ND5) (**Fig.**  
620 **1C** right side arc). Since the miR-2392 inhibition of mtDNA OXPHOS genes shown for the  
621 BALF samples (**Fig. 1C**) is also reflected in the miR-2392 down-regulation of the nuclear DNA  
622 coded mitochondrial transcripts of the complex I and IV genes and the iron-sulfur and heme iron  
623 complexes in the nasal, heart, and kidney autopsy samples (**Fig. 3D**), mitochondrial inhibition by  
624 miR-2392 appears to be the only physiological function that is common across all tissues in  
625 infected individuals. This suggests that mitochondrial modulation is a central feature of SARS-  
626 CoV-2 pathophysiology.

627 The inhibition of mitochondrial genes by miR-2392 would impair OXPHOS, which would  
628 have the most adverse effects on the high mitochondrial energetic tissues (brain, heart, kidney),  
629 the tissues central to the most severe COVID-19 cases. Inhibition of mitochondrial OXPHOS  
630 genes would increase mitochondrial reactive oxygen species (mROS) production, and induce  
631 glycolysis to compensate for the energy deficit (see top of **Fig 1C**). Mitochondrial function is  
632 regulated by the Sirtuins (Carrico et al., 2018), mitochondrial decline is associated with  
633 senescence, and mROS oxidation of mtDNA is linked to activation of the inflammasome and  
634 thus NFκB (West et al., 2015; West and Shadel, 2017; Zhong et al., 2018), all of which are  
635 modulated around miR-2392 (**Fig. 1C**). Thus, SARS-CoV-2 induction of miR-2392 (**Fig. 5**) and  
636 its associated inhibition of mtDNA and nuclear DNA OXPHOS genes (**Fig. 3** and **S1**) could  
637 explain many of the metabolic disturbances of COVID-19. Conversely, antagonism of miR-2392  
638 function should ameliorate the inhibition of OXPHOS and may explain the therapeutic benefit of  
639 the anti-miR-2392 FASTmers.

640 Using miRNAs from serum as a biomarker was first established in patients for the  
641 examination of diffuse large B-cell lymphoma (Lawrie et al., 2008). The use of miRNAs as a  
642 diagnostic biomarker has several advantages. Circulating miRNAs are readily obtained through a  
643 minimally invasive blood draw and are remarkably resistant to degradation in the plasma and  
644 serum (Mitchell et al., 2008). Measuring differentially expressed miRNAs may also provide a

645 means to detect asymptomatic individuals as previously demonstrated in another viral infection  
646 (Hou et al., 2017). However, potential confounding diseases that may influence the expression of  
647 multiple miRNAs requires the further evaluation of the targets found in this study (**Fig. 5**).

648 Recent advances in RNA chemistry and delivery systems enabled the first miRNA-based  
649 agents to enter into clinical trials several years ago (Rupaimoole and Slack, 2017). It was  
650 discovered that miR-122 increased the stability and replication of the Hepatitis C virus (HCV)  
651 through binding to the 5' end of the non-coding region that prevented degradation by the Xrn1  
652 exoribonuclease (Jopling et al., 2005; Thibault et al., 2015). In a phase I clinical trial, a 15-  
653 nucleotide phosphorothioate DNA-locked nucleic acid anti-miRNA that is designed to inhibit  
654 miR-122 was first used and demonstrated no adverse reactions. In a subsequent phase IIa trial of  
655 36 patients, there was a significant dose-dependent decrease in HCV load, one patient reported a  
656 grade 3 adverse event (thrombocytopenia), and only a small set of patients experienced viral  
657 rebound that may be linked to mutations of the HCV viral RNA (Janssen et al., 2013; Ottosen et  
658 al., 2015). A separate clinical trial with a N-acetyl-Dgalactosamine (GalNAc)-conjugated anti-  
659 miRNA targeting miR-122 and antiviral agents (ledipasvir and sofosbuvir) was successful in  
660 reducing viral loads in all treated patients within 4 weeks of treatment as well as sustained viral  
661 response in three patients after 76 weeks of follow-up (van der Ree et al., 2017), however  
662 subsequent treatments have been suspended due to two cases of severe jaundice. These clinical  
663 trials have demonstrated the promising potential of using anti-miRNAs to significantly reduce  
664 viral infection with limited adverse effects and the similarities with miR-2392 with SARS-CoV-2  
665 warrant further investigations to push to clinical trials.

666 Presently, there remains no specific treatment option for patients presenting with severe  
667 COVID-19 disease. While vaccines provide a promising avenue towards preventing the  
668 development of these symptoms as well as curbing the infection rate, there remains an urgency to  
669 successfully develop and implement therapeutic agents to reduce severe consequences from  
670 infection and subsequent patient mortality. As the testing of antibody-based or drug targeted  
671 therapies are currently underway, the added utility of miRNAs represents a novel category of  
672 therapeutic agents that have previously shown endogenous activity to alter viral infection.

673  
674 **Acknowledgments:** This work was supported by supplemental funds for COVID-19 research  
675 from Translational Research Institute of Space Health through NASA Cooperative Agreement  
676 NNX16AO69A (T-0404 to A.B. and T-0406 to A.C.) and further funding from KBR, Inc  
677 provided to A.B; this work used resources services, and support provided via the COVID-19  
678 HPC Consortium (<https://covid19-hpc-consortium.org/>) which is a unique private-public effort to  
679 bring together government, industry, and academic leaders who are volunteering free compute  
680 time and resources, in support of COVID-19 research and resources supporting this work were  
681 provided by the NASA High-End Computing (HEC) Program through the NASA Advanced  
682 Supercomputing (NAS) Division at Ames Research Center which was awarded to A.B.; DOD  
683 W81XWH-21-1-0128 awarded to D.C.W.; NIGMS P20 GM1009005 awarded to N.A.;  
684 Individual National Research Service Award F32-AI147587 awarded to J.M.D.; NIH/NHBLI  
685 K08 HL143271 and NIH/NHLBI R03 HL155249 awarded to R.S.H.; NIH/NCI U54 CA260543  
686 supported R.S.H., N.M.B., M.C.W.; NSF 1956233 awarded to R.M.; A.P. was supported by  
687 Biotechnology and Biological Sciences Research Council (<https://bbsrc.ukri.org/>) grants  
688 BB/K004131/1, BB/F00964X/1 and BB/M025047/1, Consejo Nacional de Ciencia y Tecnología



689 Paraguay - CONACyT (<http://www.conacyt.gov.py/>) grants 14-INV-088 and PINV15-315,  
690 National Science Foundation Advances in Bio Informatics (<https://www.nsf.gov/>) grant  
691 1660648; D.G. and A.P. were supported by the CONACyT grant PINV20-337 and the Fundação  
692 Getulio Vargas. N.M.B. was supported by the National Center for Advancing Translational  
693 Sciences (NCATS), NIH UL1TR002489, 2KR1272005, 550KR242003. Thanks to Dr. Richard  
694 Bowen for his assistance with the hamster studies.

695

#### 696 **Author contributions**

697 Conceptualization: A.B.; Methodology: A.B.; Formal Analysis: A.B., R.M., C.V., D.T., F.J.E.,  
698 C.M., C.M., J.C.S., J.T.M., J.M.D., D.G., U.S., E.S.W., A.S., J.F., V.Z., N.S., T.J.T.;  
699 Investigation: A.B., C.V., R.M., C.E.M., A.C., P.N., M.F., R.A.B., M.M., S.L.M., A.Y., T.R.A.;  
700 Sample Collection: M.M.S., M.C.W., R.S.H., N.M.B., U.C.P.C., A.D.H., J.C.; Resources: A.B.,  
701 R.M., C.E.M., A.C., M.S., M.F., M.C.W.; Writing – Original Draft: A.B., J.T.M.; Writing –  
702 Review & Editing: A.B., J.T.M., F.J.E., R.J.G., W.P., M.M.S., J.M.D., J.W.G., D.W., S.B., V.Z.,  
703 E.S.W., S.V.C., N.A., A.P., D.G., M.F., P.M.C., M.M., M.R.E., J.C.S., A.C., R.M., N.S., T.J.T.,  
704 B.C., L.N.S., M.C.W.; Visualization: A.B., J.S.C., F.J.E., D.G., N.S., V.Z.; Supervision: A.B.;  
705 Funding Acquisition: A.B.

706

#### 707 **Declaration of Interests**

708 The authors declare no competing interests.

709

#### 710 **Figure Legends**

711

712 **Figure 1. Key miRNA signature as predicted from Bronchial Alveolar Lavage Fluid**  
713 **(BALF) RNA-seq data in patients with COVID-19. A)** Predicted upstream regulators  
714 determined through Ingenuity Pathway Analysis (IPA) consistent with the transcriptional  
715 response from differentially expressed genes (FDR<0.05; outer ring). Eight miRNAs were  
716 among the key regulators in response to COVID-19 (inner ring). **B)** Major biological responses  
717 resulting from dysregulation of this eight miRNA signature drive immune- and inflammatory-  
718 related pathways as well as mitochondrial dysfunction determined through IPA. **C)** Pathway  
719 regulation by miR-2392 from BALF RNA-seq data determined through IPA.

720

721 **Figure 2. Cross-species and viral integration of miR-2392. A)** The conservation of miR-2392  
722 across species determined by UCSC Genome Browser. The boxes (■) represent aligning and  
723 conserved sequence regions. Double horizontal line (=) represents both the genome and query  
724 have unalignable sequence between regions of aligned sequence, a double-sided insertion. Single  
725 lines (-) indicate gaps that are largely due to a deletion in the genome of the first species or an  
726 insertion in the genome of the second species. **B)** The expression of MEG3, the miR-2392 host  
727 gene, in different tissues from healthy patients. **C)** Potential binding sites of miR-2392 visualized  
728 across 300 windows of 100bp length in SARS-CoV-2 genomes (NC045512.2 reference, and  
729 representative genomes for variants and lineages of concern from GISAID). The score in each  
730 window is the average of miRanda scores for hits within that 100bp window. Three top hits are  
731 shown explicitly at the bottom of the plot.

732

733 **Figure 3. Gene targets of miR-2392 in COVID-19 patients as well as mitochondrial and**  
734 **inflammatory genes.** Volcano plots showing the differential gene expression analysis from **A)**  
735 nasopharyngeal swab and autopsy COVID-19 patient tissues from the **B)** heart, **C)** kidney, **D)**  
736 liver, **E)** lung, and **F)** lymph node from RNA-seq datasets separated by viral load. **G)** Differential  
737 gene expression analysis for all miR-2392 gene targets significantly expressed in nasopharyngeal  
738 swab and autopsy COVID-19 patient tissues. The heatmaps display the t-score statistics for  
739 comparing viral load vs negative patient sample for all samples. Main gene clusters were  
740 determined through k-mean clustering. Six main gene clusters were determined and ShinyGO  
741 (Ge et al., 2020) was utilized to determine the pathways for each cluster which are displayed on  
742 the top panel of the heatmap. miR-2392 gene targets in for **H)** mitochondrial specific genes or **I)**  
743 inflammatory genes are displayed. Differentially expressed genes are shown with at least one  
744 comparison demonstrating a significant adjusted p-value ( $FDR < 0.05$ ) when comparing COVID-  
745 19 patients (high, medium or low viral loads) to non-infected control patients (none). A heatmap  
746 for the miR-2392 mitochondrial gene targets from the full list of targets determined only from  
747 miRmap is available in **Fig. S1**. A heatmap for the miR-2392 inflammatory gene targets from the  
748 full list of targets determined only from miRmap is available in **Fig. S2**. **J)** Scatter plot of  $\log_2$ -  
749 transformed Fold Changes in RNAs and proteins for miR-2392 targets. The chart shows a set of  
750 genes differentially expressed at the RNA level. Student's t-test, RNA p-value  $\leq 0.05$ , no  
751 limitation on protein p-value. **K)** Scatter plot of  $\log_2$  transformed medians in RNAs and proteins.  
752 The orange color represents COVID-19 positive samples, grey - COVID-19 negative samples.  
753 Student's t-test is used in Fold Change calculations. The size and the opacity of the point  
754 represent  $\log_2$ -transformed Fold Change at the RNA level. The shape of the point represents  
755 Fold Change direction: circle - positive, triangle - negative. Pearson correlation for COVID-19  
756 positive samples displayed in orange, for COVID-19 negative samples - in grey.

757  
758 **Figure 4. Increased miR-2392 expression *in vitro* mimics a COVID-19 disease phenotype.**  
759 **A-F)** Volcano plots for RNA-seq results in cells overexpressing miR-2392. **G-J)** Correlation plot  
760 of RNA-seq between miR-2392 overexpression and related SARS-CoV-2 datasets. The circle  
761 size is proportional to the correlation coefficient. Statistical significance was determined using a  
762 two-tailed Student's t-test \* $p < 0.05$ , \*\* $p < 0.01$ , \*\*\* $p < 0.001$ . **K-O)** Dot plots for statistically  
763 significant gene sets determined by fgSEA. NES, nominal enrichment score. **P)** and **Q)**  
764 Predicted miR-2392 targets by the MIRDIP algorithm that are downregulated in the  
765 overexpression experiments. The putative miR-2392 mRNA targets belonging to the consensus  
766 transcriptomic networks observed in SARS-CoV-2, MERS and Influenza infections of different  
767 human cells are represented in a Venn diagram in the upper part of the panel **P**.

768  
769 **Figure 5. Circulating miR-2392 with COVID-19 patients compared to COVID-19 negative**  
770 **patients.** Droplet digital PCR (ddPCR) with specific primer for miR-2392 was performed on  
771 serum, urine, and nasopharyngeal swab samples (including other seasonal coronavirus samples)  
772 from COVID-19 positive and negative patients. The miRNA concentration is reported as  
773 copies/5ng RNA. **A)** The levels of miRNA-2392 in all tissues from patients grouped as SARS-  
774 CoV-2 positive (SARS-nCoV-2) or negative (neg). Unadjusted t-tests comparing the SARS-  
775 CoV-2 positive to neg for each tissue are provided and also adjusted statistics comparing the

776 groups with a mixed model corrected for age and sex is provided. **B)** Receiver Operating  
777 Characteristic (ROC) curve is provided for miR-2392 for each tissue comparing SARS-CoV-2  
778 positive to negative patients. **C)** Comparing specific categories within each tissue type between  
779 COVID-19 positive and negative patients. N = COVID-19 Negative, P = COVID-19 positive,  
780 P<sub>int</sub> = intubated patients, outp = outpatient, ICU = Intensive care unit/inpatient, Cold =  
781 Coronaviruses related to the common cold, NL63 = NL63 coronavirus, and CoV-2 = SARS-  
782 CoV-2. For all plots \* = p < 0.05, \*\* = p < 0.01, and \*\*\* = p < 0.001. We also quantified three  
783 other miRNAs with same patient samples as comparison which were miR-1-3p (**Fig. S3**), miR-  
784 155-5p (**Fig. S4**), and miR-124-3p (**Fig. S5**).

785  
786 **Figure 6. Anti-miR-2393 therapeutic mitigation of SARS-CoV-2 infection with *in vitro* and**  
787 ***in vivo* models. A)** Schematic of the design for the miR-2392 inhibitor with the FASTmer  
788 platform, the synthesis and formulation of the inhibitor, and the experimental models utilized for  
789 testing the inhibitor. **B) – D)** Anti-miR-2392 FASTmer inhibitor applied to A549 human cells  
790 infected with SARS-CoV-2 and tested for viral viability and cytotoxicity. Viral viability is  
791 inhibited by 100% with near 0% cytotoxicity. **E) – G)** Nonsense FASTmer inhibitor applied to  
792 A549 human cells infected with SARS-CoV-2 and tested for viral viability and cytotoxicity.  
793 Viral viability is inhibited by 50% with near 0% cytotoxicity. **H) – J)** Toxicity and efficacy of  
794 anti-miR-2392 FASTmer inhibitor in an *in vivo* infection hamster model. There were six  
795 treatments groups: SBCov207 by IP injection 24 hours prior to viral inoculation (IP Day -1),  
796 SBCov207 by IP injection 24 hours prior to viral inoculation and 24 hours post-viral challenge  
797 (IP Day -1, +1), SBCov207 by IN injection 24 hours prior viral inoculation (IN Day -1),  
798 SBCov207 by IN injection 24 hours prior viral inoculation and 24 hours post-viral challenge (IN  
799 Day -1, +1), and 100ul of PBS as a control treatment 24 hours prior and post-viral challenge  
800 through IN instillation (PBS IN Day -1, +1). **H)** Weights per day for each of the 5 groups pooled  
801 (n = 6 for days 1 – 3 and n = 3 for days 4 -7), and the maximum percent weight loss, observing  
802 for the two different endpoints. **I)** SARS-CoV-2 assayed by plaque assay on Vero E6 cells from  
803 oropharyngeal swabs collected on days 1, 2 and 3. N=6 for each treatment group. **J)**  
804 Histopathological total score for lung tissues at day 3; anti-miR-2392 treatments have lower  
805 scores than the PBS control. Intranasal (IN), intraperitoneal (IP).

806  
807 **Figure 7. Predicted impact of miR-2392 on human disease and the top-20 drug compounds**  
808 **predicted to affect miR-2392 expression through machine learning approach. A)** Dot plot of  
809 diseases associated with miR-2392, as predicted from miR-2392 gene targets by miRnet. The  
810 diseases were manually curated to emphasize specific diseases and tissues. The values are plotted  
811 according to p-value, and the size of each dot represents the number of downstream gene targets  
812 for miR-2392 associated with each disease prediction. The specific cancer relationship to miR-  
813 2392 is highlighted in **Fig. S7**, relating miR-2392 expression with patient survival in a pan-  
814 cancer analysis. **B)** Barplot of scores using our matrix completion model to predict small  
815 molecules that affect miRNA expression. Higher scores indicate more predicted associations. **C)**  
816 Barplot of the normalized connectivity map (CMAP) scores. We used transcripts induced by  
817 miR-2392 overrepresented genes to query CMAP. Higher negative scores reflect a greater

818 reversal of the miR-2392 transcriptomic signature. Further details on model statistics and  
819 performance are found in **Figs. S8 – S10**.

820

## 821 **Supplemental Figures and Material**

822

### 823 **The UNC COVID-19 Pathobiology Consortium is comprised of:**

824 Shannon M Wallet<sup>1,2</sup>, Robert Maile<sup>2,3</sup>, Matthew C Wolfgang<sup>2,4</sup>, Robert S Hagan<sup>4,5</sup>, Jason R  
825 Mock<sup>4,5</sup>, Natalie M Bowman<sup>6</sup>, Jose L Torres-Castillo<sup>5</sup>, Miriya K Love<sup>5</sup>, Suzanne L Meinig<sup>4</sup>, Will  
826 Lovell<sup>1</sup>, Colleen Rice<sup>5</sup>, Olivia Mitchem<sup>1</sup>, Dominique Burgess<sup>1</sup>, Jessica Suggs<sup>1</sup>, Jordan Jacobs<sup>3</sup>

827

828 <sup>1</sup>Department of Oral and Craniofacial Health Sciences, UNC Adams School of Dentistry,  
829 University of North Carolina School of Medicine, Chapel Hill, NC, 27599, USA

830 <sup>2</sup>Department of Microbiology & Immunology, University of North Carolina School of Medicine,  
831 Chapel Hill, NC, 27599, USA

832 <sup>3</sup>Department of Surgery, University of North Carolina School of Medicine, Chapel Hill, NC,  
833 27599, USA

834 <sup>4</sup>Marsico Lung Institute, University of North Carolina at Chapel Hill, Chapel Hill, NC, 27599,  
835 USA

836 <sup>5</sup>Division of Pulmonary Diseases and Critical Care Medicine, Department of Medicine,  
837 University of North Carolina, Chapel Hill, NC 27599, USA

838 <sup>6</sup>Division of Infectious Disease, School of Medicine, University of North Carolina, Chapel Hill,  
839 NC, 27599, USA

840

841 **Figure S1. Mitochondrial gene targets of miR-2392 and regulated pathways. Related to**  
842 **Figure 3.** Differential gene expression analysis for all miR-2392 mitochondrial gene targets  
843 significantly expressed in nasopharyngeal swab and autopsy COVID-19 patient tissues. The  
844 heatmaps display the t-score statistics for comparing viral load vs negative patient sample for all  
845 samples. Main gene clusters were determined through k-mean clustering. Nine main gene  
846 clusters were determined and ShinyGO (Ge et al., 2020) was utilized to determine the pathways  
847 for each cluster which are displayed on the top panel of the heatmap. Differentially expressed  
848 genes are shown with at least one comparison demonstrating a significant adjusted p-value  
849 (FDR<0.05) when comparing COVID-19 patients (high, medium or low viral loads) to non-  
850 infected control patients (none). Mir-2392 gene targets only determined from miRmap.

851

852 **Figure S2. Inflammatory gene targets of miR-2392 and regulated pathways. Related to**  
853 **Figure 3.** Differential gene expression analysis for all miR-2392 inflammatory gene targets  
854 significantly expressed in nasopharyngeal swab and autopsy COVID-19 patient tissues. The  
855 heatmaps display the t-score statistics for comparing viral load vs negative patient sample for all  
856 samples. Main gene clusters were determined through k-mean clustering. Eight main gene  
857 clusters were determined and ShinyGO (Ge et al., 2020) was utilized to determine the pathways  
858 for each cluster which are displayed on the top panel of the heatmap. Differentially expressed  
859 genes are shown with at least one comparison demonstrating a significant adjusted p-value

860 (FDR<0.05) when comparing COVID-19 patients (high, medium or low viral loads) to non-  
861 infected control patients (none). Mir-2392 gene targets only determined from miRmap.

862

863 **Figure S3. Circulating miR-1-3p with COVID-19 patients compared to COVID-19 negative**  
864 **patients. Related to Figure 5.** Droplet digital PCR (ddPCR) with specific primer for miR-1-3p  
865 was performed on serum, urine, and nasopharyngeal swab samples (including other seasonal  
866 coronavirus samples) from COVID-19 positive and negative patients. The miRNA concentration  
867 are reported as copies/5ng RNA. **A)** The levels of miRNA-2392 in all tissues from patients  
868 grouped as SARS-CoV-2 positive (SARS-nCoV-2) or negative (neg). Unadjusted t-tests  
869 comparing the SARS-CoV-2 positive to neg for each tissue are provided and also adjusted  
870 statistics comparing the groups with a mixed model corrected for age and sex is provided. **B)**  
871 Receiver Operating Characteristic (ROC) curve is provided for miR-1-3p for each tissue  
872 comparing SARS-CoV-2 positive to negative patients. **C)** Comparing specific categories within  
873 each tissue type between COVID-19 positive and negative patients. N = COVID-19 Negative, P  
874 = COVID-19 positive, P<sub>int</sub> = intubated patients, outp = outpatient, ICU = Intensive care  
875 unit/inpatient, Cold = Coronaviruses related to the common cold, NL63 = NL63 coronavirus, and  
876 CoV-2 = SARS-CoV-2. For all plots \* = p < 0.05, \*\* = p < 0.01, and \*\*\* = p < 0.001.

877

878 **Figure S4. Circulating miR-155-5p with COVID-19 patients compared to COVID-19**  
879 **negative patients. Related to Figure 5.** Droplet digital PCR (ddPCR) with specific primer for  
880 miR-155-5p was performed on serum, urine, and nasopharyngeal swab samples (including other  
881 seasonal coronavirus samples) from COVID-19 positive and negative patients. The miRNA  
882 concentration are reported as copies/5ng RNA. **A)** The levels of miRNA-2392 in all tissues from  
883 patients grouped as SARS-CoV-2 positive (SARS-nCoV-2) or negative (neg). Unadjusted t-tests  
884 comparing the SARS-CoV-2 positive to neg for each tissue are provided and also adjusted  
885 statistics comparing the groups with a mixed model corrected for age and sex is provided. **B)**  
886 Receiver Operating Characteristic (ROC) curve is provided for miR-155-5p for each tissue  
887 comparing SARS-CoV-2 positive to negative patients. **C)** Comparing specific categories within  
888 each tissue type between COVID-19 positive and negative patients. N = COVID-19 Negative, P  
889 = COVID-19 positive, P<sub>int</sub> = intubated patients, outp = outpatient, ICU = Intensive care  
890 unit/inpatient, Cold = Coronaviruses related to the common cold, NL63 = NL63 coronavirus, and  
891 CoV-2 = SARS-CoV-2. For all plots \* = p < 0.05, \*\* = p < 0.01, and \*\*\* = p < 0.001.

892

893 **Figure S5. Circulating miR-124-3p with COVID-19 patients compared to COVID-19**  
894 **negative patients. Related to Figure 5.** Droplet digital PCR (ddPCR) with specific primer for  
895 miR-124-3p was performed on serum, urine, and nasopharyngeal swab samples (including other  
896 seasonal coronavirus samples) from COVID-19 positive and negative patients. The miRNA  
897 concentration are reported as copies/5ng RNA. For miR-124-3p, the copies/5ng were either equal  
898 to 0 or at extremely low levels close to 0 copies/5ng. To try to determine any statistical  
899 differences we categorized the groups as ND = Not Determined which are all 0 values or D =  
900 Determined which are values > 0 for both N = negative (open symbols) and P = COVID-19  
901 positive patients samples (closed symbols). The number of patients for each column is shown

902 above the points. No significant differences were observed for any of the sample for miR-124-  
903 3p.

904

905 **Figure S6. miR-2392 expression pan-cancer survival analysis. Related to Figure 7.** Kaplan  
906 Meier patient survival plots for miR-2392 expression in a pan-cancer analysis was determined  
907 utilizing The Kaplan Meier plotter (Nagy et al., 2021). The plots were separated with the top row  
908 being cancers which patients had significantly poor survival with high expression of miR-2392,  
909 the middle row being cancers which patients had poor survival (but not significant) with high  
910 expression of miR-2392, and the bottom row being cancers which patients had significantly  
911 better survival with high expression of miR-2392.

912

913 **Figure S7. Small molecules-miRNA dataset statistics Related to Figure 7.** (Left) Number of  
914 small molecules associated to miRNAs. (Right) Number of miRNAs associated to small  
915 molecules.

916

917 **Figure S8. Performance of our method at predicting missing small molecule-miRNA**  
918 **interactions. Related to Figure 7.** (Top) The mean value of the Receiver Operating Curve  
919 (ROC) is shown for a ten-fold cross-validation experiment (dark blue). 95% confidence interval  
920 is also shown (light blue). (Bottom) The mean value of the Precision-Recall Curve (PRC) is  
921 shown for a ten-fold cross-validation experiment (dark salmon). 95% confidence interval is also  
922 shown (light salmon).

923

924 **Figure S9. Performance of our method at predicting missing small molecule-miRNA**  
925 **interactions when controlling for data imbalance. Related to Figure 7.** (Top) Area Under the  
926 Receiver Operating Curve (AUROC) was obtained in a ten-fold cross-validation experiment for  
927 varying values of the negative to positive label ratio in the test set. (Bottom) Area Under the  
928 Precision-Recall Curve (AUROC) was obtained in a ten-fold cross-validation experiment for  
929 varying values of the negative to positive label ratio in the test set.

930

931 **Table S1. Annealing temperatures for miRNA primers, related to methods and Figure 5.**  
932 Temperatures used for droplet digital PCR to quantify each miRNA target.

933

934 **STAR<sup>®</sup>Methods**

935

936 **RESOURCE AVAILABILITY**

937 ***Lead Contact***

938 Further information and requests for resources and reagents should be directed to and will be  
939 fulfilled by the Lead Contact, Afshin Beheshti ([afshin.beheshti@nasa.gov](mailto:afshin.beheshti@nasa.gov)).

940

941 ***Materials Availability***

942 This study did not generate new unique reagents.

943

944 ***Data and Code Availability***

945 The published article includes all datasets generated and analyzed during this study.  
946 Processed bulk RNA-seq data is available online (<https://covidgenes.weill.cornell.edu/>). RNA-  
947 Seq alignment script for BALF samples and SHSY-5Y cells studies are attached. Limma script  
948 for SHSY5Y studies is attached.

949

950

## 951 **EXPERIMENTAL MODEL AND SUBJECT DETAILS**

952

### 953 *Human serum and nasopharyngeal swab sample collection for ddPCR*

954 All plasma and nasal swab samples from those with COVID-19 infection, seasonal  
955 coronavirus infection, and controls were collected from inpatients at the University of Maryland  
956 Medical Center, in Baltimore, USA, between March and May of 2020. Sample collection  
957 obtained through informed consent waiver, which was approved by the University of Maryland,  
958 Baltimore IRB.

959 For serum samples, N=10 samples from COVID-19 intubated patients, COVID-19  
960 outpatients, and COVID-19 negative patients were obtained. An equal distribution of N=5 males  
961 and females were used for each group. Also, an equal age distribution of patients from 27 to 85  
962 years old was utilized for each group.

963 For the nasopharyngeal samples the following patient samples were obtained: N=10 SARS-  
964 CoV-2 positive patients, N=6 common cold coronavirus samples, and N=6 Coronavirus NL63  
965 samples. For the common cold coronavirus samples the breakdown was the following for the  
966 specific viruses: N=2 Coronavirus 229E, Coronavirus HKU1, and N=2 Coronavirus OC43.

967

### 968 *Human nasopharyngeal swab sample collection for RNA-seq analysis*

969 Patient specimens were processed as described in Butler et al., 2020 (Butler et al., 2021).  
970 Briefly, nasopharyngeal swabs were collected using the BD Universal Viral Transport Media  
971 system (Becton, Dickinson and Company, Franklin Lakes, NJ) from symptomatic patients. Total  
972 Nucleic Acid (TNA) was extracted from using automated nucleic acid extraction on the  
973 QIA Symphony and the DSP Virus/Pathogen Mini Kit (Qiagen).

974

### 975 *Human autopsy tissue collection for RNA-seq analysis*

976 The full methods of the patient sample collection from the autopsy patients are currently  
977 available in the Park et al. (Park et al., 2021). All autopsies are performed with consent of next of  
978 kin and permission for retention and research use of tissue. Autopsies were performed in a  
979 negative pressure room with protective equipment including N-95 masks; brain and bone were  
980 not obtained for safety reasons. All fresh tissues were procured prior to fixation and directly into  
981 Trizol for downstream RNA extraction. Tissues were collected from lung, liver, lymph nodes,  
982 kidney, and the heart as consent permitted. For GeoMx, RNAscope, trichrome and histology  
983 tissue sections were fixed in 10% neutral buffered formalin for 48 hours before processing and  
984 sectioning. These cases had a post-mortem interval of less than 48 hours. For bulk RNA-seq  
985 tissues, post-mortem intervals ranged from less than 24 hours to 72 hours (with 2 exceptions -  
986 one at 4 and one at 7 days - but passing RNA quality metrics) with an average of 2.5 days. All  
987 deceased patient remains were refrigerated at 4°C prior to autopsy performance.

988

### 989 ***Human urine sample collection***

990 Urine was collected from patients and volunteers at the University of North Carolina at  
991 Chapel Hill. All patients provided informed consent prior to participation in IRB-approved re-  
992 search protocols (UNC IRB: 20-0822 [RHS] and 20-0792 [NMB]). Mid-stream urine of outpa-  
993 tients and non-critically ill patients was collected by the clean catch method. Urine of intubated  
994 critically ill patients was collected from a port on the Foley catheter. Urine was aliquoted into 5  
995 ml aliquots and stored at -80°C.

996 Urine aliquots were thawed, and microRNA was extracted from 1 ml per sample using  
997 Norgen Urine microRNA Purification Kit (Cat. 29000). Microalbumin and creatinine levels were  
998 assessed using Microalbumin 2-1 Combo strips (CLIAwaived Inc, cat# URS-2M).

999

### 1000 ***Cell lines used for miR-2392 mimic experiments***

1001 Human SH-SY5Y cells were obtained from the ATCC and grown in Minimum Essential  
1002 Medium (Gibco) / 10% FBS (Invitrogen) /1% MEM Non Essential Amino Acids (Gibco) /  
1003 1% GlutaMAX -1 (Gibco). Cells were plated in 3.5 cm dishes and incubated with miR-2392 or  
1004 control lentivirus particles (MOI 1) for 48h. Cells were harvested and lysed in Trizol reagent and  
1005 RNA was extracted following manufacturers protocol (Invitrogen).

1006

### 1007 ***COVID-19 hamster model***

1008 Male Syrian hamsters 6-8 weeks old were utilized for efficacy studies with anti-miR-2392  
1009 FASTmer treatment. Three hamsters were used for each experimental group for a total of 30  
1010 hamsters with 10 treatment groups. Hamsters were infected with  $10^5$  pfu of SARS-CoV-2. There  
1011 were 5 major treatment groups (N=6 per group) with two endpoints at day 3 or 7 post-viral  
1012 challenge (N=3 per endpoint). Groups 1 and 3 were given the FASTmer treatment by IP injection  
1013 while groups 2 and 4 were given by IN instillation under ketamine-xylazine anesthesia. Groups 1  
1014 and 2 were given single FASTmer treatment 24 hours before viral challenge. Groups 3 and 4  
1015 were given two doses of FASTmers at 24 hours before and 24 hours after viral challenge. The  
1016 control group 5 was treated with PBS 24 hours prior to and 24 hours following viral challenge by  
1017 IN instillation.

1018 Treatment efficacy was assessed in multiple ways: 1) Change in daily body weight, 2)  
1019 oropharyngeal shedding of virus on days 1-3 from all groups post-challenge assayed by plaque  
1020 assay on Vero E6 cells (PFU/swab), 3) tissue burden of the virus at necropsy on day 3 from 2  
1021 lung tubes and turbinates assayed by plaque assay (PFU/100mg), and 4) histopathologic scoring  
1022 on lungs and turbinates from all hamsters; the histopathological score for individual tissues,  
1023 inflammation score from the interstitial lung inflammation, and total histopathological  
1024 scores/assessment was made.

1025 The dose of anti-miR-2392 that was used was calculated to raise blood levels to 10  $\mu$ M if it  
1026 were given intravenously. The molecular weight of anti-miR-2392 is 15,804. Assuming that  
1027 hamsters weigh 120 grams and have 8% of body weight as blood, blood volume was  
1028 approximately 0.01 liters. The dose per hamster was 1.58 mg in a 100  $\mu$ l volume from an anti-  
1029 miR-2392 solution.

1030



1031 ***In vitro viral screening model***

1032 A549-ACE2 cells, gifted by Dr. Brad Rosenberg (MSSM), were maintained in DMEM  
1033 (Quality Biological, Gaithersburg, MD; #112-014-101) + 10% Fetal Bovine Serum (Gibco;  
1034 #26140079) + 1% Penicillin-Streptomycin (Gemini Bio; #400-109). The day prior to treatment,  
1035 5,000 A549-ACE2 cells were plated per well in 96-well plates. MiR-2932 was diluted in  
1036 duplicate in A549-ACE2 media to a starting concentration of 20 $\mu$ M (Run 1) or 22 $\mu$ M (Runs 2  
1037 and 3), and then an 8-point 1:2 dilution series was prepared. Media was removed from cells and  
1038 90 $\mu$ L of each dilution was transferred to the cells. The plates were incubated for 2 hours at 37°C  
1039 before being infected with an M.O.I. of 0.1 SARS-CoV-2 WA-1 (provided by Dr. Natalie  
1040 Thornburg at the Centers for Disease Control and Prevention). Parallel plates were also run and  
1041 left uninfected to monitor toxicity. Since Runs 2 and 3 were run simultaneously, a single toxicity  
1042 plate was run for both. All plates were incubated at 37°C for 72 hours before being analyzed via  
1043 Cell Titer Glo (Promega, Madison, WI; #G7573). Cell viability was compared to uninfected,  
1044 untreated cells and infected, untreated cells.

1045

1046 **METHOD DETAILS**

1047

1048 ***miRNA extraction for Droplet Digital PCR (ddPCR)***

1049 MiRNA extractions from serum were carried out using the Qiagen miRNeasy serum/plasma  
1050 kit (#217184). MiRNA extractions from urine samples were carried out using Norgen urine  
1051 microRNA Purification Kit (Cat. 29000, Norgen Bioteck Corp. Thorold, ON, Canada).  
1052 Quantitation of miRNA samples was done using a NanoDrop 2000 Spectrophotometer  
1053 (ThermoFisher Scientific).

1054

1055 ***cDNA generation and ddPCR***

1056 First, cDNA was synthesized from miRNA samples using the Qiagen miRCURY LNA RT  
1057 Kit (Cat. 339340) using a concentration of 5ng/ $\mu$ L for the miRNA per sample. Next, samples  
1058 were mixed with a 1:20 dilution of the generated cDNA with the BioRad QX200 ddPCR  
1059 Evagreen Supermix (Cat. 1864034) and the appropriate miRNA primers from miRCURY LNA  
1060 miRNA PCR Assays (Qiagen). BioRad QX200 Automated Droplet Generator (Cat. 1864101)  
1061 was used to create emulsion droplets. With the C1000 Touch™ Thermal Cycler with 96-Deep  
1062 Well Reaction Module (Bio-Rad) the following PCR reaction was used for all the primers: 1  
1063 cycle 95°C for 5 min, 40 cycles of 95°C for 30 sec and 58°C for 1 min (the annealing  
1064 temperature can change depending on the primer), 1 cycle of 4°C for 5 min, and 1 cycle of 90°C  
1065 for 5 min. Not all miRNA primers sets for ddPCR will have the same annealing temperature, so  
1066 optimizing the annealing temperature is required for each primer set. Their respective annealing  
1067 temperatures are found in **Table S1**. Finally, the QX200™ Droplet Digital™ PCR System (Bio-  
1068 Rad) quantified the amount of miRNA for each primer set per sample. QuantaSoft software (Bio-  
1069 Rad) generated the data for each primer set and sample. The same threshold setting was used for  
1070 all samples per primer set. The concentration (miRNA copies/ $\mu$ L) value generated by QuantaSoft  
1071 was converted to miRNA copies/ng of serum. These values were used for all miRNA analysis.  
1072 For all analysis the miRNA concentrations were  $\log_2(x+1)$  transformed to allow for easy  
1073 comparison between miRNAs and samples.

1074

1075 ***Publicly available Bronchial Alveolar Lavage Fluid (BALF) COVID-19 RNA-sequencing data***

1076 Fastq files were downloaded from SRA (NCBI BioProject PRJNA605907 (Shen et al., 2020)  
1077 and NCBI BioProject PRJNA390194 (Ren et al., 2018)). Fastq data files were trimmed using  
1078 TrimGalore v (0.6.4) with a quality cutoff of 30. Data were then aligned using STAR (v2.7.3)  
1079 two pass mode to the Human reference genome (GRCh38 v99 downloaded 04-27-2020).  
1080 Unaligned data were written to a fastq file, and then realigned to the GRCh38 reference genome  
1081 using Bowtie 2 (v2.3.4.1), and output sam file converted to a bam file using samtools (v1.7). The  
1082 resultant Bam files were merged, sorted, and read groups added using picard tools (v2.21.3)  
1083 (script in supplemental data).

1084

1085 ***Publicly available RNA-seq data: A549, Calu-3, NHBE, and COVID-19 lung biopsy***

1086 Raw RNA-seq read counts from the publication by Blanco-Melo *et al.* for the A549, Calu-3,  
1087 and NHBE cell lines as well as post-mortem lung biopsies from two COVID-19 patients were  
1088 downloaded from the Gene Expression Omnibus (series accession GSE147507) (Blanco-Melo et  
1089 al., 2020).

1090

1091 ***RNA-seq of Nasopharyngeal Swab COVID-19 patient samples***

1092 RNA isolation and library preparation is fully described in Butler, et al. (Butler et al., 2021).  
1093 Briefly, library preparation on the all nasopharyngeal swab samples' total nucleic acid (TNA)  
1094 were treated with DNase 1 (Zymo Research, Catalog # E1010). Post-DNase digested samples  
1095 were then put into the NEBNext rRNA depletion v2 (Human/Mouse/Rat), Ultra II Directional  
1096 RNA (10 $\mu$ g), and Unique Dual Index Primer Pairs were used following the vendor protocols  
1097 from New England Biolabs. Kits were supplied from a single manufacturer lot. Completed  
1098 libraries were quantified by Qubit or equivalent and run on a Bioanalyzer or equivalent for size  
1099 determination. Libraries were pooled and sent to the WCM Genomics Core or HudsonAlpha for  
1100 final quantification by Qubit fluorometer (ThermoFisher Scientific), TapeStation 2200 (Agilent),  
1101 and qRT-PCR using the Kapa Biosystems Illumina library quantification kit.

1102

1103 ***RNA-seq of COVID-19 autopsy tissue samples***

1104 RNA isolation and library preparation is fully described in Park, et al. (Park et al., 2021).  
1105 Briefly, autopsy tissues were collected from lung, liver, lymph nodes, kidney, and the heart and  
1106 were placed directly into Trizol, homogenized and then snap frozen in liquid nitrogen. At least  
1107 after 24 hours these tissue samples were then processed via standard protocols to isolate RNA.  
1108 New York Genome Center RNA sequencing libraries were prepared using the KAPA Hyper  
1109 Library Preparation Kit + RiboErase, HMR (Roche) in accordance with manufacturer's  
1110 recommendations. Briefly, 50-200ng of Total RNA were used for ribosomal depletion and  
1111 fragmentation. Depleted RNA underwent first and second strand cDNA synthesis followed by  
1112 adenylation, and ligation of unique dual indexed adapters. Libraries were amplified using 12  
1113 cycles of PCR and cleaned-up by magnetic bead purification. Final libraries were quantified  
1114 using fluorescent-based assays including PicoGreen (Life Technologies) or Qubit Fluorometer  
1115 (Invitrogen) and Fragment Analyzer (Advanced Analytics) and sequenced on a NovaSeq 6000  
1116 sequencer (v1 chemistry) with 2x150bp targeting 60M reads per sample.

1117

### 1118 *miR-2392 mimic experiments in SH-SY5Y cells and RNA-seq*

1119 RNA was dissolved in nuclease free water and concentration determined spectrometrically at  
1120 260nm using a Biotek plate reader (Biotek). 500ng RNA was used as input for a whole  
1121 transcriptome library preparation (ThermoFisher Total RNA). Libraries were quantified using a  
1122 bioanalyzer chip reader (nanoDNA chips: Aglient Technologies) and diluted to 100 pM final  
1123 concentration. Barcoded libraries were combined and use to seed a OneTouch bead templating  
1124 reaction (OneTouch2). Cloned libraries were enriched and loaded on 540 Ion Torrent chips.  
1125 Data were sequenced using the Ion Torrent RNA-seq workflow. Unaligned Bam files were  
1126 converted to fastq and aligned to the Grch 38 reference genome using STAR Two pass approach  
1127 (Dobin paper) to create gene count tables as described in Overbery et al. (Overbey et al., 2021)  
1128 (script in supplementary).

1129

### 1130 *Anti-miR-2392 FASTmer inhibitor design and construction*

1131 The FAST (Facile Accelerated Specific Therapeutics) platform was used to design FASTmer  
1132 inhibitors, which are composed of a nanobiohydrd molecule based on antisense peptide nucleic  
1133 acid (PNA) moiety conjugated to nanoparticle for improved delivery and membrane transport.  
1134 The PNA moiety was chosen to be 15 bases long (in order to maximize both solubility and  
1135 specificity), which yielded six potential target sequences within the 20-nucleotide mature human  
1136 miR-2392. These potential targets were screened using FAST for solubility, self-complementing  
1137 sequences, and off-targeting within the human genome (GCF\_000001405.26) and SARS-CoV-2  
1138 viral genome (NC\_045512). The antisense sequence complementing miR-2392 nucleotides 2 to  
1139 16 (TCTCACCCCATCCT) was chosen in order to minimize off-targeting while maximizing  
1140 coverage of the miR-2392 seed region. The FASTmer was synthesized (with an N-terminal  
1141 histidine tag and a 2-(2-(2-aminoethoxy)ethoxy)acetic acid linker) on an Apex 396 peptide  
1142 synthesizer (AAPPTec, LLC) with solid-phase Fmoc chemistry. Fmoc-PNA monomers were  
1143 obtained from PolyOrg Inc., with A, C, and G monomers protected with Bhoc groups. Following  
1144 synthesis, the peptides were conjugated with nanoparticles and purified via size-exclusion  
1145 filtration. Conjugation and concentration of the purified solution was monitored through  
1146 measurement of absorbance at 260 nm (for detection of PNA) and 400 nm (for quantification of  
1147 gold nanoparticles).

1148

## 1149 **QUANTIFICATION AND STATISTICAL ANALYSIS**

1150

### 1151 *Analysis of BALF RNA-seq data*

1152 Bam files were imported into Partek Genome Studio v7.0, and gene expression values  
1153 quantified vs the Grch38 reference annotation guide (Ensembl v99). Samples with fewer than 2  
1154 million aligned reads were excluded from further analysis. Genes with fewer than 10 reads in  
1155 25% of samples were excluded, and differential gene expression determined using ANOVA with  
1156 infection status as contrast. Differentially expressed gene files were used in GSEA and IPA to  
1157 determine biological significance and pathways being regulated.

1158

### 1159 *Analysis of Nasopharyngeal Swab RNA-seq data*

1160 The nasopharyngeal swab samples were analyzed comparing COVID-19 viral infection to  
1161 the negative patients and was as previously described in Butler et al. (Butler et al., 2021) and the  
1162 DESeq2 (Love et al., 2014) was utilized to generate the differential expression data. Heatmaps  
1163 were displayed using pheatmap (Kolde, 2015). Volcano plots were made use R program  
1164 EnhancedVolcano (Blighe et al., 2018).

1165

### 1166 *Analysis of Autopsy RNA-seq data*

1167 The full methods of the analysis from the autopsy patients is currently available in the Park et  
1168 al. (Park et al., 2021). Briefly, RNA-seq data was processed through the nf-core/rnaseq pipeline  
1169 (Ewels et al., 2020). This workflow involved adapter trimming using Trim Galore!  
1170 (<https://github.com/FelixKrueger/TrimGalore>), read alignment with STAR (Dobin et al., 2013),  
1171 gene quantification with Salmon (Patro et al., 2017), duplicate read marking with Picard  
1172 MarkDuplicates (<https://github.com/broadinstitute/picard>), and transcript quantification with  
1173 StringTie (Kovaka et al., 2019). Other quality control measures included RSeQC, Qualimap, and  
1174 dupRadar. Alignment was performed using the GRCh38 build native to nf-core and annotation  
1175 was performed using Gencode Human Release 33 (GRCH38.p13). FeatureCounts reads were  
1176 normalized using variance-stabilizing transform (vst) in DESeq2 package in R for visualization  
1177 purposes in log-scale (Love et al., 2014). Differential expression of genes were calculated by  
1178 DESeq2. Differential expression comparisons were done as either COVID+ cases versus  
1179 COVID- controls for each tissue specifically, correcting for sequencing batches with a covariate  
1180 where applicable, or pairwise comparison of viral levels from the lung as determined by  
1181 nCounter data. Volcano plots were made use R program EnhancedVolcano (Blighe et al., 2018).

1182

### 1183 *Analysis Combining Autopsy and Nasopharyngeal Swab RNA-seq data*

1184 To combine the results from the autopsy and nasopharyngeal swab RNA-seq data, we utilized  
1185 the t-score values from the DESeq2 analysis. Heatmaps were displayed using pheatmap (Kolde,  
1186 2015).

1187

### 1188 *Gene Set Enrichment Analysis (GSEA)*

1189 For pathway analysis on the miR-2392 targets (**Fig. 3**) we utilized ShinyGO (Ge et al., 2020)  
1190 to determine the significantly regulated pathways for each main cluster in the heatmap. The  
1191 clustering was determined through k-mean statistics.

1192 For pathway analysis on the miR-2392 mimic RNA-seq data, we utilized fast Gene Set  
1193 Enrichment Analysis (fGSEA) (Korotkevich et al., 2021). Pathway analysis was done comparing  
1194 miR-2392 mimics to all controls and the ranked list of genes were defined by the t-score  
1195 statistics. The statistical significance was determined by 1000 permutations of the genesets  
1196 (Subramanian et al., 2005).

1197

### 1198 *Analysis of proteomic and transcriptomic blood datasets from COVID-19 patients*

1199 For the analysis of the miR-2392 targets in the blood tissue, we downloaded whole blood  
1200 transcriptome data and plasma proteome data from The COVIDome Explorer Researcher Portal  
1201 (Sullivan et al., 2021). For Transcriptome data we used the following filters: Category "Effect of  
1202 COVID-19 status", Platform "Blood", Statistical test "Student's t-test", Adjustment method

1203 "none", Sex "male" and "female", Age Group "All". For Proteome data we used the following  
1204 filters: Category "Effect of COVID-19 status", Platform "SOMAscan", Statistical test "Student's  
1205 t-test", Adjustment method "none", Sex "male" and "female", Age Group "All". We created the  
1206 list of the intersecting genes from both datasets. We analyzed the list using RStudio Desktop  
1207 1.3.1093 (RStudio Team (2020). RStudio: Integrated Development Environment for R. RStudio,  
1208 PBC, Boston, MA URL <http://www.rstudio.com/>), and visualized data using ggplot2 version  
1209 3.3.2 (Wickham, 2016) and ggrepel version 0.8.2 (<https://ggrepel.slowkow.com/>).

1210

#### 1211 ***Analysis of Monocyte RNA-seq data***

1212 The monocyte COVID-19 RNA-Seq data, published under the accession GSE159678  
1213 (Rother et al., 2020), was downloaded from SRA and gene expression was quantified using  
1214 Salmon's selective alignment approach (Srivastava et al., 2020). The RNA-Seq processing  
1215 pipeline was implemented using pyrpipe (Singh et al., 2021) ([https://github.com/urmi-21/pyrpipe/tree/master/case\\_studies/Covid\\_RNA-Seq](https://github.com/urmi-21/pyrpipe/tree/master/case_studies/Covid_RNA-Seq)). Exploratory data analysis and differential  
1216 expression analysis were performed using MetaOmGraph (Singh et al., 2020).

1217

#### 1218 ***Analysis of A549, Calu-3, NHBE, and COVID lung biopsy data***

1219 Each data series was normalized and filtered for low-expressed genes (counts<1). Cell  
1220 culture samples treated with SARS-CoV-2 were compared to untreated controls and COVID-19-  
1221 positive patient samples were compared to healthy lung biopsies. Differentially expressed genes  
1222 were determined from the R-program Limma-Voom (Ritchie et al., 2015) using a linear model  
1223 with weighted least squares for each gene and the false discovery rate adjusted p-values were  
1224 calculated.

1225

#### 1226 ***Analysis of miR-2392 mimic RNA-seq data***

1227 Differential gene expression was determined using LIMMA-voom (Ritchie et al., 2015).  
1228 Data were filtered to ensure data contained at least 5 million aligned reads, and average gene  
1229 counts of > 10. Cell treatments we used as contrasts for differentially expressed gene  
1230 calculations. These results were then uploaded to GSEA for further analysis. (R script in  
1231 supplementary section)

1232

#### 1233 ***Conservation of miR-2392 between species***

1234 To determined conservation of miR-2392 among different species we utilized UCSC  
1235 Genome Browser (Kent et al., 2002). Hsa-miR-2392 was entered as an input and a select of  
1236 species was used to compare which included common species that are currently used in SARS-  
1237 CoV-2 *in vivo* studies (i.e. mice, ferrets, and hamsters). We also chose primates and other  
1238 animals to provide a wide spectrum of species to observe conservation of miR-2392. Lastly, the  
1239 USCS Genome Browser provides the host gene for miR-2392 (i.e. MEG3) and redirects to GTEx  
1240 (Consortium, 2020) to provide a plot of MEG3 levels based on RNA-seq data on normal tissues.

1241

#### 1242 ***Mapping miR-2392 sequence to SARS-CoV-2 sequences***

1243 To explore potential binding sites for miR-2392 we used miRanda software (Enright et al.,  
1244 2003) to identify all potential binding sites with respect to the SARS-CoV-2 reference genome  
1245

1246 (Wuhan-Hu-1; NC045512.2) and representative genomes from lineages of concern. The lineages  
1247 of concern were selected from Global Initiative on Sharing All Influenza Data (GISAID) with  
1248 each lineage being represented by 14 recent genomes.

1249

### 1250 *In silico predictions of genes from miRNAs*

1251 Through the use of a Cytoscape (Shannon et al., 2003) plug-in called ClueGo/CluePedia  
1252 (Bindea et al., 2013), we were able to predict genes targeted by the miRNAs determined. This  
1253 involved entering all miRNAs in ClueGo and allowing the software to determine the top 50  
1254 genes that were significantly regulated and connected to the miRNAs. The predictions only  
1255 reflect the functions that will be regulated by the miRNAs and do not show whether the function  
1256 will be activated or inhibited. Lastly, miRNet 2.0 was utilized to predict the diseases and  
1257 pathways that are associated with the miRNAs (Chang et al., 2020a). This was plotted as a dot  
1258 utilizing the R-program ggplot2 (v3.2.1) (Wickham, 2016).

1259

### 1260 *ddPCR analysis of miRNA levels in patient samples*

1261 First, we normalized the amount of each miRNA measured per body location (nasal, serum,  
1262 and urine) using the general logarithm transformation. We compared miRNA levels in samples  
1263 from patients either positive or negative for SARS-nCoV-2 using the student's t-test (unadjusted)  
1264 as well as controlling for sex and age using least squares adjustment. Next, we generated receiver  
1265 operating characteristic curves from each body location to show the performance of a  
1266 classification model (SARS-nCoV-2 positive versus negative) at all classification thresholds  
1267 using the absolute, non-transformed levels (miRNA copies per 5 ng RNA). Finally, we  
1268 performed a subanalysis on each location to compare the variance of each miRNA in SARS-  
1269 nCoV-2 negative patients compared to other patient groups. For serum and nasal samples, 1-way  
1270 ANOVA was used to identify variation associated with the patient classification. For urine  
1271 samples, 2-way ANOVA was used with location (outpatient versus inpatient) and SARS-nCoV-2  
1272 positivity as the main factors. If the ANOVA yielded a  $P < 0.05$ , Dunnett's post-test was used to  
1273 compare subgroup means to the negative patient sample mean.

1274

### 1275 *Computational drug repositioning model*

1276 Using the SM2miR database (Liu et al., 2013), we assembled an  $n \times m$  binary matrix ( $X$ )  
1277 containing 3,593 associations between small molecules ( $n = 213$ , rows) and miRNAs ( $m =$   
1278  $1,519$ , columns). Each matrix entry ( $X_{ij}$ ) was assigned a value of 1 where a small molecule is  
1279 known to be associated to miRNA, and was 0 otherwise. The chemical notation as a simplified  
1280 molecular input line entry system (SMILES) was obtained for each small molecule from  
1281 PubChem. We then calculated the 2D Tanimoto chemical similarity between pairs of small  
1282 molecules using the MACCS key binary fingerprints with RDKit (RDKit: Open-source  
1283 cheminformatics; <http://www.rdkit.org>). Similarly, for each miRNA, we obtained its sequence  
1284 from miRbase (Kozomara et al., 2019) and computed sequence similarity between miRNAs as  
1285 the score of their Needleman-Wunsch alignment. We used the binary matrix, together with the  
1286 chemical and sequence similarities, as input to our state-of-the-art drug target prediction model  
1287 to predict missing associations in  $X$  (Galeano et al., 2021). The model parameters where:  $p = \frac{1}{2}$ ,

1288  $\beta_{\text{Chem}} = 1$ , and  $\alpha_{\text{seq}} = 0$ . To assess the prediction performance of the model, we performed ten-  
1289 fold cross-validation simulations.

1290

## 1291 **References**

1292 Allegra, L., Dal Sasso, M., Bovio, C., Massoni, C., Fonti, E., and Braga, P.C. (2002). Human  
1293 neutrophil oxidative bursts and their in vitro modulation by different N-acetylcysteine  
1294 concentrations. *Arzneimittelforschung* 52, 669-676.

1295 Ardestani, A., and Azizi, Z. (2021). Targeting glucose metabolism for treatment of COVID-19.  
1296 *Signal Transduct Target Ther* 6, 112.

1297 Asai, A., Konno, M., Ozaki, M., Otsuka, C., Vecchione, A., Arai, T., Kitagawa, T., Ofusa, K.,  
1298 Yabumoto, M., Hirotsu, T., *et al.* (2020). COVID-19 Drug Discovery Using Intensive  
1299 Approaches. *Int J Mol Sci* 21.

1300 Aunins, T.R., Erickson, K.E., and Chatterjee, A. (2020). Transcriptome-based design of  
1301 antisense inhibitors potentiates carbapenem efficacy in CRE *Escherichia coli*. *Proc Natl Acad Sci*  
1302 *U S A* 117, 30699-30709.

1303 Aykin-Burns, N., Franklin, E.A., and Ercal, N. (2005). Effects of N-acetylcysteine on lead-  
1304 exposed PC-12 cells. *Arch Environ Contam Toxicol* 49, 119-123.

1305 Baden, L.R., El Sahly, H.M., Essink, B., Kotloff, K., Frey, S., Novak, R., Diemert, D., Spector,  
1306 S.A., Rouphael, N., Creech, C.B., *et al.* (2021). Efficacy and Safety of the mRNA-1273 SARS-  
1307 CoV-2 Vaccine. *N Engl J Med* 384, 403-416.

1308 Bartoszewski, R., Dabrowski, M., Jakiela, B., Matalon, S., Harrod, K.S., Sanak, M., and  
1309 Collawn, J.F. (2020). SARS-CoV-2 may regulate cellular responses through depletion of specific  
1310 host miRNAs. *Am J Physiol Lung Cell Mol Physiol* 319, L444-L455.

1311 Bindea, G., Galon, J., and Mlecnik, B. (2013). CluePedia Cytoscape plugin: pathway insights  
1312 using integrated experimental and in silico data. *Bioinformatics* 29, 661-663.

1313 Bindea, G., Mlecnik, B., Hackl, H., Charoentong, P., Tosolini, M., Kirilovsky, A., Fridman,  
1314 W.H., Pages, F., Trajanoski, Z., and Galon, J. (2009). ClueGO: a Cytoscape plug-in to decipher  
1315 functionally grouped gene ontology and pathway annotation networks. *Bioinformatics* 25, 1091-  
1316 1093.

1317 Blanco-Melo, D., Nilsson-Payant, B.E., Liu, W.C., Uhl, S., Hoagland, D., Moller, R., Jordan,  
1318 T.X., Oishi, K., Panis, M., Sachs, D., *et al.* (2020). Imbalanced Host Response to SARS-CoV-2  
1319 Drives Development of COVID-19. *Cell* 181, 1036-1045 e1039.

1320 Blighe, K., Rana, S., and Lewis, M. (2018). EnhancedVolcano: Publication-ready volcano plots  
1321 with enhanced colouring and labeling. <https://github.com/kevinblighe/EnhancedVolcano>.

1322 Butler, D., Mozsary, C., Meydan, C., Foox, J., Rosiene, J., Shaiber, A., Danko, D., Afshinnkoo,  
1323 E., MacKay, M., Sedlazeck, F.J., *et al.* (2021). Shotgun transcriptome, spatial omics, and  
1324 isothermal profiling of SARS-CoV-2 infection reveals unique host responses, viral  
1325 diversification, and drug interactions. *Nat Commun* 12, 1660.

1326 Carboni, E., Carta, A.R., and Carboni, E. (2020). Can pioglitazone be potentially useful  
1327 therapeutically in treating patients with COVID-19? *Med Hypotheses* 140, 109776.

- 1328 Carfi, A., Bernabei, R., Landi, F., and Gemelli Against, C.-P.-A.C.S.G. (2020). Persistent  
1329 Symptoms in Patients After Acute COVID-19. *JAMA* 324, 603-605.
- 1330 Carrico, C., Meyer, J.G., He, W., Gibson, B.W., and Verdin, E. (2018). The Mitochondrial  
1331 Acylome Emerges: Proteomics, Regulation by Sirtuins, and Metabolic and Disease Implications.  
1332 *Cell Metab* 27, 497-512.
- 1333 Centa, A., Fonseca, A.S., Ferreira, S., Azevedo, M.L.V., Vaz de Paula, C.B., Nagashima, S.,  
1334 Machado-Souza, C., Miggiolaro, A., Baena, C.P., de Noronha, L., *et al.* (2020). Deregulated  
1335 miRNA expression is associated with endothelial dysfunction in post-mortem lung biopsies of  
1336 COVID-19 patients. *Am J Physiol Lung Cell Mol Physiol*.
- 1337 Chang, L., Zhou, G., Soufan, O., and Xia, J. (2020a). miRNet 2.0: network-based visual  
1338 analytics for miRNA functional analysis and systems biology. *Nucleic Acids Res*.
- 1339 Chang, L., Zhou, G., Soufan, O., and Xia, J. (2020b). miRNet 2.0: network-based visual  
1340 analytics for miRNA functional analysis and systems biology. *Nucleic Acids Res* 48, W244-  
1341 W251.
- 1342 Chen, J., Yao, D., Li, Y., Chen, H., He, C., Ding, N., Lu, Y., Ou, T., Zhao, S., Li, L., *et al.*  
1343 (2013). Serum microRNA expression levels can predict lymph node metastasis in patients with  
1344 early-stage cervical squamous cell carcinoma. *Int J Mol Med* 32, 557-567.
- 1345 Chen, Y., and Wang, X. (2020). miRDB: an online database for prediction of functional  
1346 microRNA targets. *Nucleic Acids Res* 48, D127-D131.
- 1347 Condorelli, G., Latronico, M.V., and Dorn, G.W., 2nd (2010). microRNAs in heart disease:  
1348 putative novel therapeutic targets? *Eur Heart J* 31, 649-658.
- 1349 Consortium, G.T. (2020). The GTEx Consortium atlas of genetic regulatory effects across human  
1350 tissues. *Science* 369, 1318-1330.
- 1351 Dickey, L.L., Worne, C.L., Glover, J.L., Lane, T.E., and O'Connell, R.M. (2016). MicroRNA-  
1352 155 enhances T cell trafficking and antiviral effector function in a model of coronavirus-induced  
1353 neurologic disease. *J Neuroinflammation* 13, 240.
- 1354 Dobin, A., Davis, C.A., Schlesinger, F., Drenkow, J., Zaleski, C., Jha, S., Batut, P., Chaisson,  
1355 M., and Gingeras, T.R. (2013). STAR: ultrafast universal RNA-seq aligner. *Bioinformatics* 29,  
1356 15-21.
- 1357 Dweep, H., and Gretz, N. (2015). miRWalk2.0: a comprehensive atlas of microRNA-target  
1358 interactions. *Nat Methods* 12, 697.
- 1359 Edmonds, C.E., Zuckerman, S.P., and Conant, E.F. (2021). Management of Unilateral Axillary  
1360 Lymphadenopathy Detected on Breast MRI in the Era of Coronavirus Disease (COVID-19)  
1361 Vaccination. *AJR Am J Roentgenol*.
- 1362 Eller, K.A., Aunins, T.R., Courtney, C.M., Campos, J.K., Otoupal, P.B., Erickson, K.E.,  
1363 Madinger, N.E., and Chatterjee, A. (2021). Facile accelerated specific therapeutic (FAST)  
1364 platform develops antisense therapies to counter multidrug-resistant bacteria. *Commun Biol* 4,  
1365 331.
- 1366 Enomoto, Y., Takagi, R., Naito, Y., Kiniwa, T., Tanaka, Y., Hamada-Tsutsumi, S., Kawano, M.,  
1367 Matsushita, S., Ochiya, T., and Miyajima, A. (2017). Identification of the novel 3' UTR  
1368 sequences of human IL-21 mRNA as potential targets of miRNAs. *Sci Rep* 7, 7780.



- 1369 Enright, A.J., John, B., Gaul, U., Tuschl, T., Sander, C., and Marks, D.S. (2003). MicroRNA  
1370 targets in *Drosophila*. *Genome Biol* 5, R1.
- 1371 Ewels, P.A., Peltzer, A., Fillinger, S., Patel, H., Alneberg, J., Wilm, A., Garcia, M.U., Di  
1372 Tommaso, P., and Nahnsen, S. (2020). The nf-core framework for community-curated  
1373 bioinformatics pipelines. *Nat Biotechnol* 38, 276-278.
- 1374 Fan, S., Tian, T., Chen, W., Lv, X., Lei, X., Zhang, H., Sun, S., Cai, L., Pan, G., He, L., *et al.*  
1375 (2019). Mitochondrial miRNA Determines Chemoresistance by Reprogramming Metabolism  
1376 and Regulating Mitochondrial Transcription. *Cancer research* 79, 1069-1084.
- 1377 Feng, L., Yin, Y.Y., Liu, C.H., Xu, K.R., Li, Q.R., Wu, J.R., and Zeng, R. (2020). Proteome-  
1378 wide Data Analysis Reveals Tissue-specific Network Associated with SARS-CoV-2 Infection. *J*  
1379 *Mol Cell Biol*.
- 1380 Friedman, R.C., Farh, K.K., Burge, C.B., and Bartel, D.P. (2009). Most mammalian mRNAs are  
1381 conserved targets of microRNAs. *Genome Res* 19, 92-105.
- 1382 Galeano, D., Noto, S., Jimenez, R., and Paccanaro, A. (2021). Interpretable Drug Target  
1383 Predictions using Self-Expressiveness. *bioRxiv*, 2021.2003.2001.433365.
- 1384 Ge, S.X., Jung, D., and Yao, R. (2020). ShinyGO: a graphical gene-set enrichment tool for  
1385 animals and plants. *Bioinformatics* 36, 2628-2629.
- 1386 Gharebaghi, R., Heidary, F., Moradi, M., and Parvizi, M. (2020). Metronidazole; a Potential  
1387 Novel Addition to the COVID-19 Treatment Regimen. *Arch Acad Emerg Med* 8, e40.
- 1388 Griffin, R.J., Monzen, H., Williams, B.W., Park, H., Lee, S.H., and Song, C.W. (2003). Arsenic  
1389 trioxide induces selective tumour vascular damage via oxidative stress and increases  
1390 thermosensitivity of tumours. *Int J Hyperthermia* 19, 575-589.
- 1391 Gudbjartsson, D.F., Norddahl, G.L., Melsted, P., Gunnarsdottir, K., Holm, H., Eythorsson, E.,  
1392 Arnthorsson, A.O., Helgason, D., Bjarnadottir, K., Ingvarsson, R.F., *et al.* (2020). Humoral  
1393 Immune Response to SARS-CoV-2 in Iceland. *N Engl J Med* 383, 1724-1734.
- 1394 Gupta, A., Madhavan, M.V., Sehgal, K., Nair, N., Mahajan, S., Sehrawat, T.S., Bikdeli, B.,  
1395 Ahluwalia, N., Ausiello, J.C., Wan, E.Y., *et al.* (2020). Extrapulmonary manifestations of  
1396 COVID-19. *Nat Med* 26, 1017-1032.
- 1397 Hemmat, N., Asadzadeh, Z., Ahangar, N.K., Alemohammad, H., Najafzadeh, B., Derakhshani,  
1398 A., Baghbanzadeh, A., Baghi, H.B., Javadrashid, D., Najafi, S., *et al.* (2021). The roles of  
1399 signaling pathways in SARS-CoV-2 infection; lessons learned from SARS-CoV and MERS-  
1400 CoV. *Archives of Virology* 166, 675-696.
- 1401 Herrmann, J., Mori, V., Bates, J.H.T., and Suki, B. (2020). Modeling lung perfusion  
1402 abnormalities to explain early COVID-19 hypoxemia. *Nat Commun* 11, 4883.
- 1403 Ho, W.Z., and Douglas, S.D. (1992). Glutathione and N-acetylcysteine suppression of human  
1404 immunodeficiency virus replication in human monocyte/macrophages in vitro. *AIDS Res Hum*  
1405 *Retroviruses* 8, 1249-1253.
- 1406 Hou, X., Liang, Y., Chen, J., Wei, Y., Zeng, P., Wang, L., Lu, C., and Diao, H. (2017).  
1407 Expression Profiling of Cellular MicroRNA in Asymptomatic HBsAg Carriers and Chronic  
1408 Hepatitis B Patients. *Biomed Res Int* 2017, 6484835.

- 1409 Hou, Z., Fan, F., and Liu, P. (2019). BTXA regulates the epithelial-mesenchymal transition and  
1410 autophagy of keloid fibroblasts via modulating miR-1587/miR-2392 targeted ZEB2. *Biosci Rep*  
1411 39.
- 1412 Hu, H.M., Chen, Y., Liu, L., Zhang, C.G., Wang, W., Gong, K., Huang, Z., Guo, M.X., Li,  
1413 W.X., and Li, W. (2013). C1orf61 acts as a tumor activator in human hepatocellular carcinoma  
1414 and is associated with tumorigenesis and metastasis. *FASEB J* 27, 163-173.
- 1415 Hu, S., Li, Z., Lan, Y., Guan, J., Zhao, K., Chu, D., Fan, G., Guo, Y., Gao, F., and He, W.  
1416 (2020). MiR-10a-5p-Mediated Syndecan 1 Suppression Restricts Porcine Hemagglutinating  
1417 Encephalomyelitis Virus Replication. *Front Microbiol* 11, 105.
- 1418 Huang, C., Wang, Y., Li, X., Ren, L., Zhao, J., Hu, Y., Zhang, L., Fan, G., Xu, J., Gu, X., *et al.*  
1419 (2020). Clinical features of patients infected with 2019 novel coronavirus in Wuhan, China.  
1420 *Lancet* 395, 497-506.
- 1421 Hultstrom, M., Lipcsey, M., Wallin, E., Larsson, I.M., Larsson, A., and Frithiof, R. (2021).  
1422 Severe acute kidney injury associated with progression of chronic kidney disease after critical  
1423 COVID-19. *Crit Care* 25, 37.
- 1424 Ibrahim, H., Perl, A., Smith, D., Lewis, T., Kon, Z., Goldenberg, R., Yarta, K., Staniloae, C., and  
1425 Williams, M. (2020). Therapeutic blockade of inflammation in severe COVID-19 infection with  
1426 intravenous N-acetylcysteine. *Clin Immunol* 219, 108544.
- 1427 Islam, M.S., and Islam, A.B.M.M.K. (2021). Viral miRNAs confer survival in host cells by  
1428 targeting apoptosis related host genes. *Informatics in Medicine Unlocked* 22, 100501.
- 1429 Jacobs, L.G., Gourni Paleoudis, E., Lesky-Di Bari, D., Nyirenda, T., Friedman, T., Gupta, A.,  
1430 Rasouli, L., Zetkusic, M., Balani, B., Ogedegbe, C., *et al.* (2020). Persistence of symptoms and  
1431 quality of life at 35 days after hospitalization for COVID-19 infection. *PLoS One* 15, e0243882.
- 1432 Janssen, H.L., Reesink, H.W., Lawitz, E.J., Zeuzem, S., Rodriguez-Torres, M., Patel, K., van der  
1433 Meer, A.J., Patock, A.K., Chen, A., Zhou, Y., *et al.* (2013). Treatment of HCV infection by  
1434 targeting microRNA. *N Engl J Med* 368, 1685-1694.
- 1435 Jia, D., Koonce, N.A., Griffin, R.J., Jackson, C., and Corry, P.M. (2010). Prevention and  
1436 mitigation of acute death of mice after abdominal irradiation by the antioxidant N-acetyl-cysteine  
1437 (NAC). *Radiat Res* 173, 579-589.
- 1438 Jiang, Q., Wang, Y., Hao, Y., Juan, L., Teng, M., Zhang, X., Li, M., Wang, G., and Liu, Y.  
1439 (2009). miR2Disease: a manually curated database for microRNA deregulation in human  
1440 disease. *Nucleic Acids Res* 37, D98-104.
- 1441 Jima, D.D., Zhang, J., Jacobs, C., Richards, K.L., Dunphy, C.H., Choi, W.W., Au, W.Y.,  
1442 Srivastava, G., Czader, M.B., Rizzieri, D.A., *et al.* (2010). Deep sequencing of the small RNA  
1443 transcriptome of normal and malignant human B cells identifies hundreds of novel microRNAs.  
1444 *Blood* 116, e118-127.
- 1445 Johansen, M.D., Irving, A., Montagutelli, X., Tate, M.D., Rudloff, I., Nold, M.F., Hansbro, N.G.,  
1446 Kim, R.Y., Donovan, C., Liu, G., *et al.* (2020). Animal and translational models of SARS-CoV-2  
1447 infection and COVID-19. *Mucosal Immunol* 13, 877-891.
- 1448 Jopling, C.L., Yi, M., Lancaster, A.M., Lemon, S.M., and Sarnow, P. (2005). Modulation of  
1449 hepatitis C virus RNA abundance by a liver-specific MicroRNA. *Science* 309, 1577-1581.

- 1450 Kent, W.J., Sugnet, C.W., Furey, T.S., Roskin, K.M., Pringle, T.H., Zahler, A.M., and Haussler,  
1451 D. (2002). The human genome browser at UCSC. *Genome Res* *12*, 996-1006.
- 1452 Kharazmi, A., Nielsen, H., and Schiotz, P.O. (1988). N-acetylcysteine inhibits human neutrophil  
1453 and monocyte chemotaxis and oxidative metabolism. *Int J Immunopharmacol* *10*, 39-46.
- 1454 Kolde, R. (2015). pheatmap: Pretty heatmaps [Software].
- 1455 Korotkevich, G., Sukhov, V., Budin, N., Shpak, B., Artyomov, M.N., and Sergushichev, A.  
1456 (2021). Fast gene set enrichment analysis. bioRxiv, 060012.
- 1457 Koumpa, F.S., Forde, C.T., and Manjaly, J.G. (2020). Sudden irreversible hearing loss post  
1458 COVID-19. *BMJ Case Rep* *13*.
- 1459 Kovaka, S., Zimin, A.V., Pertea, G.M., Razaghi, R., Salzberg, S.L., and Pertea, M. (2019).  
1460 Transcriptome assembly from long-read RNA-seq alignments with StringTie2. *Genome Biol* *20*,  
1461 278.
- 1462 Kozomara, A., Birgaoanu, M., and Griffiths-Jones, S. (2019). miRBase: from microRNA  
1463 sequences to function. *Nucleic Acids Res* *47*, D155-D162.
- 1464 Krajewski, P.K., Maj, J., and Szepietowski, J.C. (2021). Cutaneous Hyperaesthesia in SARS-  
1465 CoV-2 Infection: Rare but not Unique Clinical Manifestation. *Acta Derm Venereol* *101*,  
1466 adv00366.
- 1467 Lamb, J., Crawford, E.D., Peck, D., Modell, J.W., Blat, I.C., Wrobel, M.J., Lerner, J., Brunet,  
1468 J.P., Subramanian, A., Ross, K.N., *et al.* (2006). The Connectivity Map: using gene-expression  
1469 signatures to connect small molecules, genes, and disease. *Science* *313*, 1929-1935.
- 1470 Lawrie, C.H., Gal, S., Dunlop, H.M., Pushkaran, B., Liggins, A.P., Pulford, K., Banham, A.H.,  
1471 Pezzella, F., Boulwood, J., Wainscoat, J.S., *et al.* (2008). Detection of elevated levels of tumour-  
1472 associated microRNAs in serum of patients with diffuse large B-cell lymphoma. *Br J Haematol*  
1473 *141*, 672-675.
- 1474 Ledford, H. (2020). Coronavirus breakthrough: dexamethasone is first drug shown to save lives.  
1475 *Nature* *582*, 469.
- 1476 Li, J., Li, T., Lu, Y., Shen, G., Guo, H., Wu, J., Lei, C., Du, F., Zhou, F., Zhao, X., *et al.* (2017).  
1477 MiR-2392 suppresses metastasis and epithelial-mesenchymal transition by targeting MAML3  
1478 and WHSC1 in gastric cancer. *FASEB J* *31*, 3774-3786.
- 1479 Li, K., Chen, G., Hou, H., Liao, Q., Chen, J., Bai, H., Lee, S., Wang, C., Li, H., Cheng, L., *et al.*  
1480 (2021). Analysis of sex hormones and menstruation in COVID-19 women of child-bearing age.  
1481 *Reprod Biomed Online* *42*, 260-267.
- 1482 Liu, X., Wang, S., Meng, F., Wang, J., Zhang, Y., Dai, E., Yu, X., Li, X., and Jiang, W. (2013).  
1483 SM2miR: a database of the experimentally validated small molecules' effects on microRNA  
1484 expression. *Bioinformatics* *29*, 409-411.
- 1485 Lott, M.T., Leipzig, J.N., Derbeneva, O., Xie, H.M., Chalkia, D., Sarmady, M., Procaccio, V.,  
1486 and Wallace, D.C. (2013). mtDNA Variation and Analysis Using Mitomap and Mitomaster. *Curr*  
1487 *Protoc Bioinformatics* *44*, 1 23 21-26.
- 1488 Love, M.I., Huber, W., and Anders, S. (2014). Moderated estimation of fold change and  
1489 dispersion for RNA-seq data with DESeq2. *Genome Biol* *15*, 550.

- 1490 Loza, M.J., McCall, C.E., Li, L., Isaacs, W.B., Xu, J., and Chang, B.L. (2007). Assembly of  
1491 inflammation-related genes for pathway-focused genetic analysis. *PLoS One* 2, e1035.
- 1492 Ma, Y., Wang, C., Xue, M., Fu, F., Zhang, X., Li, L., Yin, L., Xu, W., Feng, L., and Liu, P.  
1493 (2018). The Coronavirus Transmissible Gastroenteritis Virus Evades the Type I Interferon  
1494 Response through IRE1alpha-Mediated Manipulation of the MicroRNA miR-30a-5p/SOCS1/3  
1495 Axis. *J Virol* 92.
- 1496 Mahajan, A., and Mason, G.F. (2021). A sobering addition to the literature on COVID-19 and  
1497 the brain. *J Clin Invest*.
- 1498 Malik, Z.R., Razaq, Z., Siff, M., and Sheikh, S. (2020). COVID-19 Presenting as Banti's  
1499 Syndrome. *Cureus* 12, e9096.
- 1500 Mishra, P.K., Tandon, R., and Byrareddy, S.N. (2020). Diabetes and COVID-19 risk: an miRNA  
1501 perspective. *Am J Physiol Heart Circ Physiol* 319, H604-H609.
- 1502 Mitchell, P.S., Parkin, R.K., Kroh, E.M., Fritz, B.R., Wyman, S.K., Pogosova-Agadjanyan, E.L.,  
1503 Peterson, A., Noteboom, J., O'Briant, K.C., Allen, A., *et al.* (2008). Circulating microRNAs as  
1504 stable blood-based markers for cancer detection. *Proc Natl Acad Sci U S A* 105, 10513-10518.
- 1505 Nagy, A., Lanczky, A., Menyhart, O., and Gyorffy, B. (2018). Validation of miRNA prognostic  
1506 power in hepatocellular carcinoma using expression data of independent datasets. *Sci Rep* 8,  
1507 9227.
- 1508 Nagy, A., Munkacsy, G., and Gyorffy, B. (2021). Pancancer survival analysis of cancer hallmark  
1509 genes. *Sci Rep* 11, 6047.
- 1510 Nersisyan, S., Engibaryan, N., Gorbonos, A., Kirdey, K., Makhonin, A., and Tonevitsky, A.  
1511 (2020). Potential role of cellular miRNAs in coronavirus-host interplay. *PeerJ* 8, e9994.
- 1512 Nishiga, M., Wang, D.W., Han, Y., Lewis, D.B., and Wu, J.C. (2020). COVID-19 and  
1513 cardiovascular disease: from basic mechanisms to clinical perspectives. *Nat Rev Cardiol* 17, 543-  
1514 558.
- 1515 Ochsner, S.A., Pillich, R.T., and McKenna, N.J. (2020). Consensus transcriptional regulatory  
1516 networks of coronavirus-infected human cells. *Sci Data* 7, 314.
- 1517 Ottosen, S., Parsley, T.B., Yang, L., Zeh, K., van Doorn, L.J., van der Veer, E., Raney, A.K.,  
1518 Hodges, M.R., and Patick, A.K. (2015). In vitro antiviral activity and preclinical and clinical  
1519 resistance profile of miravirsin, a novel anti-hepatitis C virus therapeutic targeting the human  
1520 factor miR-122. *Antimicrob Agents Chemother* 59, 599-608.
- 1521 Park, J., Foon, J., Hether, T., Danko, D., Warren, S., Kim, Y., Reeves, J., Butler, D.J., Mozsary,  
1522 C., Rosiene, J., *et al.* (2021). Systemic Tissue and Cellular Disruption from SARS-CoV-2  
1523 Infection revealed in COVID-19 Autopsies and Spatial Omics Tissue Maps. *bioRxiv*,  
1524 2021.2003.2008.434433.
- 1525 Park, J.L., Park, S.M., Kwon, O.H., Lee, H.C., Kim, J.Y., Seok, H.H., Lee, W.S., Lee, S.H.,  
1526 Kim, Y.S., Woo, K.M., *et al.* (2014). Microarray screening and qRT-PCR evaluation of  
1527 microRNA markers for forensic body fluid identification. *Electrophoresis* 35, 3062-3068.
- 1528 Patro, R., Duggal, G., Love, M.I., Irizarry, R.A., and Kingsford, C. (2017). Salmon provides fast  
1529 and bias-aware quantification of transcript expression. *Nat Methods* 14, 417-419.

- 1530 Polack, F.P., Thomas, S.J., Kitchin, N., Absalon, J., Gurtman, A., Lockhart, S., Perez, J.L., Perez  
1531 Marc, G., Moreira, E.D., Zerbini, C., *et al.* (2020). Safety and Efficacy of the BNT162b2 mRNA  
1532 Covid-19 Vaccine. *N Engl J Med* 383, 2603-2615.
- 1533 Pontecorvi, G., Bellenghi, M., Ortona, E., and Care, A. (2020). microRNAs as new possible  
1534 actors in gender disparities of Covid-19 pandemic. *Acta Physiol (Oxf)* 230, e13538.
- 1535 Poppe, M., Wittig, S., Jurida, L., Bartkuhn, M., Wilhelm, J., Muller, H., Beuerlein, K., Karl, N.,  
1536 Bhujju, S., Ziebuhr, J., *et al.* (2017). The NF-kappaB-dependent and -independent transcriptome  
1537 and chromatin landscapes of human coronavirus 229E-infected cells. *PLoS Pathog* 13,  
1538 e1006286.
- 1539 Portincasa, P., Krawczyk, M., Machill, A., Lammert, F., and Di Ciaula, A. (2020). Hepatic  
1540 consequences of COVID-19 infection. Lapping or biting? *Eur J Intern Med* 77, 18-24.
- 1541 Rath, S., Sharma, R., Gupta, R., Ast, T., Chan, C., Durham, T.J., Goodman, R.P., Grabarek, Z.,  
1542 Haas, M.E., Hung, W.H.W., *et al.* (2021). MitoCarta3.0: an updated mitochondrial proteome  
1543 now with sub-organelle localization and pathway annotations. *Nucleic Acids Res* 49, D1541-  
1544 D1547.
- 1545 Rodriguez, M., Soler, Y., Perry, M., Reynolds, J.L., and El-Hage, N. (2020). Impact of Severe  
1546 Acute Respiratory Syndrome Coronavirus 2 (SARS-CoV-2) in the Nervous System: Implications  
1547 of COVID-19 in Neurodegeneration. *Front Neurol* 11, 583459.
- 1548 Rossi, R., Talarico, M., Coppi, F., and Boriani, G. (2020). Protective role of statins in COVID 19  
1549 patients: importance of pharmacokinetic characteristics rather than intensity of action. *Intern*  
1550 *Emerg Med* 15, 1573-1576.
- 1551 Rother, N., Yanginlar, C., Lindeboom, R.G.H., Bekkering, S., van Leent, M.M.T., Buijsers, B.,  
1552 Jonkman, I., de Graaf, M., Baltissen, M., Lamers, L.A., *et al.* (2020). Hydroxychloroquine  
1553 Inhibits the Trained Innate Immune Response to Interferons. *Cell Rep Med* 1, 100146.
- 1554 Rupaimoole, R., and Slack, F.J. (2017). MicroRNA therapeutics: towards a new era for the  
1555 management of cancer and other diseases. *Nat Rev Drug Discov* 16, 203-222.
- 1556 Sacar Demirci, M.D., and Adan, A. (2020). Computational analysis of microRNA-mediated  
1557 interactions in SARS-CoV-2 infection. *PeerJ* 8, e9369.
- 1558 Sadoff, J., Le Gars, M., Shukarev, G., Heerwegh, D., Truyers, C., de Groot, A.M., Stoop, J.,  
1559 Tete, S., Van Damme, W., Leroux-Roels, I., *et al.* (2021). Interim Results of a Phase 1-2a Trial  
1560 of Ad26.COV2.S Covid-19 Vaccine. *N Engl J Med*.
- 1561 Sadowska, A.M., Manuel-y-Keenoy, B., Vertongen, T., Schippers, G., Radomska-Lesniewska,  
1562 D., Heytens, E., and De Backer, W.A. (2006). Effect of N-acetylcysteine on neutrophil activation  
1563 markers in healthy volunteers: in vivo and in vitro study. *Pharmacol Res* 53, 216-225.
- 1564 Sardar, R., Satish, D., and Gupta, D. (2020). Identification of Novel SARS-CoV-2 Drug Targets  
1565 by Host MicroRNAs and Transcription Factors Co-regulatory Interaction Network Analysis.  
1566 *Front Genet* 11, 571274.
- 1567 Schult, P., Roth, H., Adams, R.L., Mas, C., Imbert, L., Orlik, C., Ruggieri, A., Pyle, A.M., and  
1568 Lohmann, V. (2018). microRNA-122 amplifies hepatitis C virus translation by shaping the  
1569 structure of the internal ribosomal entry site. *Nat Commun* 9, 2613.

- 1570 Self, W.H., Tenforde, M.W., Stubblefield, W.B., Feldstein, L.R., Steingrub, J.S., Shapiro, N.I.,  
1571 Ginde, A.A., Prekker, M.E., Brown, S.M., Peltan, I.D., *et al.* (2020). Decline in SARS-CoV-2  
1572 Antibodies After Mild Infection Among Frontline Health Care Personnel in a Multistate Hospital  
1573 Network - 12 States, April-August 2020. *MMWR Morb Mortal Wkly Rep* 69, 1762-1766.
- 1574 Shannon, P., Markiel, A., Ozier, O., Baliga, N.S., Wang, J.T., Ramage, D., Amin, N.,  
1575 Schwikowski, B., and Ideker, T. (2003). Cytoscape: a software environment for integrated  
1576 models of biomolecular interaction networks. *Genome Res* 13, 2498-2504.
- 1577 Shu, Y., and McCauley, J. (2017). GISAID: Global initiative on sharing all influenza data - from  
1578 vision to reality. *Euro Surveill* 22.
- 1579 Singh, U., Hur, M., Dorman, K., and Wurtele, E.S. (2020). MetaOmGraph: a workbench for  
1580 interactive exploratory data analysis of large expression datasets. *Nucleic Acids Res* 48, e23.
- 1581 Singh, U., Li, J., Seetharam, A., and Wurtele, E.S. (2021). pyrpipe: a python package for RNA-  
1582 Seq workflows. *bioRxiv*, 2020.2003.2004.925818.
- 1583 Sirin, D.A., and Ozcelik, F. (2021). The relationship between COVID-19 and the dental damage  
1584 stage determined by radiological examination. *Oral Radiol*.
- 1585 Sirota, M., Dudley, J.T., Kim, J., Chiang, A.P., Morgan, A.A., Sweet-Cordero, A., Sage, J., and  
1586 Butte, A.J. (2011). Discovery and preclinical validation of drug indications using compendia of  
1587 public gene expression data. *Sci Transl Med* 3, 96ra77.
- 1588 Srivastava, A., Malik, L., Sarkar, H., Zakeri, M., Almodaresi, F., Soneson, C., Love, M.I.,  
1589 Kingsford, C., and Patro, R. (2020). Alignment and mapping methodology influence transcript  
1590 abundance estimation. *Genome Biol* 21, 239.
- 1591 Su, M., Chen, Y., Qi, S., Shi, D., Feng, L., and Sun, D. (2020). A Mini-Review on Cell Cycle  
1592 Regulation of Coronavirus Infection. *Front Vet Sci* 7, 586826.
- 1593 Subramanian, A., Tamayo, P., Mootha, V.K., Mukherjee, S., Ebert, B.L., Gillette, M.A.,  
1594 Paulovich, A., Pomeroy, S.L., Golub, T.R., Lander, E.S., *et al.* (2005). Gene set enrichment  
1595 analysis: a knowledge-based approach for interpreting genome-wide expression profiles. *Proc*  
1596 *Natl Acad Sci U S A* 102, 15545-15550.
- 1597 Sullivan, K.D., Galbraith, M.D., Kinning, K.T., Bartsch, K., Levinsky, N., Araya, P., Smith,  
1598 K.P., Granrath, R.E., Shaw, J.R., Baxter, R., *et al.* (2021). The COVIDome Explorer Researcher  
1599 Portal. *medRxiv*.
- 1600 Tang, H., Gao, Y., Li, Z., Miao, Y., Huang, Z., Liu, X., Xie, L., Li, H., Wen, W., Zheng, Y., *et*  
1601 *al.* (2020). The noncoding and coding transcriptional landscape of the peripheral immune  
1602 response in patients with COVID-19. *Clin Transl Med* 10, e200.
- 1603 Teodori, L., Sestili, P., Madiari, V., Coppari, S., Fraternali, D., Rocchi, M.B.L., Ramakrishna, S.,  
1604 and Albertini, M.C. (2020). MicroRNAs Bioinformatics Analyses Identifying HDAC Pathway as  
1605 a Putative Target for Existing Anti-COVID-19 Therapeutics. *Front Pharmacol* 11, 582003.
- 1606 Thibault, P.A., Huys, A., Amador-Canizares, Y., Gailius, J.E., Pinel, D.E., and Wilson, J.A.  
1607 (2015). Regulation of Hepatitis C Virus Genome Replication by Xrn1 and MicroRNA-122  
1608 Binding to Individual Sites in the 5' Untranslated Region. *J Virol* 89, 6294-6311.

- 1609 Tribolet, L., Kerr, E., Cowled, C., Bean, A.G.D., Stewart, C.R., Dearnley, M., and Farr, R.J.  
1610 (2020). MicroRNA Biomarkers for Infectious Diseases: From Basic Research to Biosensing.  
1611 *Front Microbiol* *11*, 1197.
- 1612 Trobaugh, D.W., and Klimstra, W.B. (2017). MicroRNA Regulation of RNA Virus Replication  
1613 and Pathogenesis. *Trends Mol Med* *23*, 80-93.
- 1614 V'Kovski, P., Kratzel, A., Steiner, S., Stalder, H., and Thiel, V. (2021). Coronavirus biology and  
1615 replication: implications for SARS-CoV-2. *Nat Rev Microbiol* *19*, 155-170.
- 1616 van der Ree, M.H., de Vree, J.M., Stelma, F., Willemsse, S., van der Valk, M., Rietdijk, S.,  
1617 Molenkamp, R., Schinkel, J., van Nuenen, A.C., Beuers, U., *et al.* (2017). Safety, tolerability,  
1618 and antiviral effect of RG-101 in patients with chronic hepatitis C: a phase 1B, double-blind,  
1619 randomised controlled trial. *Lancet* *389*, 709-717.
- 1620 Vejnar, C.E., and Zdobnov, E.M. (2012). MiRmap: comprehensive prediction of microRNA  
1621 target repression strength. *Nucleic Acids Res* *40*, 11673-11683.
- 1622 Wallace, D.C. (2018). Mitochondrial genetic medicine. *Nat Genet* *50*, 1642-1649.
- 1623 Walsh-Messinger, J., Manis, H., Vrabec, A., Sizemore, J., Bishof, K., Debidda, M., Malaspina,  
1624 D., and Greenspan, N. (2020). The Kids Are Not Alright: A Preliminary Report of Post-COVID  
1625 Syndrome in University Students. medRxiv.
- 1626 West, A.P., Khoury-Hanold, W., Staron, M., Tal, M.C., Pineda, C.M., Lang, S.M., Bestwick, M.,  
1627 Duguay, B.A., Raimundo, N., MacDuff, D.A., *et al.* (2015). Mitochondrial DNA stress primes  
1628 the antiviral innate immune response. *Nature* *520*, 553-557.
- 1629 West, A.P., and Shadel, G.S. (2017). Mitochondrial DNA in innate immune responses and  
1630 inflammatory pathology. *Nat Rev Immunol* *17*, 363-375.
- 1631 Wickham, H. (2016). *ggplot2: Elegant Graphics for Data Analysis* (Springer-Verlag New York).
- 1632 Widiasta, A., Sribudiani, Y., Nugrahapraja, H., Hilmanto, D., Sekarwana, N., and Rachmadi, D.  
1633 (2020). Potential role of ACE2-related microRNAs in COVID-19-associated nephropathy.  
1634 *Noncoding RNA Res* *5*, 153-166.
- 1635 Yang, J., Li, C., Li, H., and E, C. (2019). LncRNA CACNA1G-AS1 facilitates hepatocellular  
1636 carcinoma progression through the miR-2392/C1orf61 pathway. *J Cell Physiol* *234*, 18415-  
1637 18422.
- 1638 Yang, S., Pei, Y., Li, X., Zhao, S., Zhu, M., and Zhao, A. (2016). miR-124 attenuates Japanese  
1639 encephalitis virus replication by targeting DNM2. *Virol J* *13*, 105.
- 1640 Younis, J.S., Abassi, Z., and Skorecki, K. (2020). Is there an impact of the COVID-19 pandemic  
1641 on male fertility? The ACE2 connection. *Am J Physiol Endocrinol Metab* *318*, E878-E880.
- 1642 Zamani, B., Moeini Taba, S.M., and Shayestehpour, M. (2021). Systemic lupus erythematosus  
1643 manifestation following COVID-19: a case report. *J Med Case Rep* *15*, 29.
- 1644 Zhong, Z., Liang, S., Sanchez-Lopez, E., He, F., Shalpour, S., Lin, X.J., Wong, J., Ding, S.,  
1645 Seki, E., Schnabl, B., *et al.* (2018). New mitochondrial DNA synthesis enables NLRP3  
1646 inflammasome activation. *Nature* *560*, 198-203.
- 1647 Zhu, N., Zhang, D., Wang, W., Li, X., Yang, B., Song, J., Zhao, X., Huang, B., Shi, W., Lu, R.,  
1648 *et al.* (2020). A Novel Coronavirus from Patients with Pneumonia in China, 2019. *N Engl J Med*  
1649 *382*, 727-733.

- 1650 Abdelrahman, Z., Liu, Q., Jiang, S., Li, M., Sun, Q., Zhang, Y., and Wang, X. (2021). Evaluation  
1651 of the Current Therapeutic Approaches for COVID-19: A Systematic Review and a Meta-  
1652 analysis. *Front Pharmacol* 12, 607408.
- 1653 Alamdari, D.H., Moghaddam, A.B., Amini, S., Keramati, M.R., Zarmehri, A.M., Alamdari,  
1654 A.H., Damsaz, M., Banpour, H., Yarahmadi, A., and Koliakos, G. (2020). Application of  
1655 methylene blue -vitamin C -N-acetyl cysteine for treatment of critically ill COVID-19 patients,  
1656 report of a phase-I clinical trial. *Eur J Pharmacol* 885, 173494.
- 1657 Ardestani, A., and Azizi, Z. (2021). Targeting glucose metabolism for treatment of COVID-19.  
1658 *Signal Transduct Target Ther* 6, 112.
- 1659 Bojkova, D., Klann, K., Koch, B., Widera, M., Krause, D., Ciesek, S., Cinatl, J., and Munch, C.  
1660 (2020). Proteomics of SARS-CoV-2-infected host cells reveals therapy targets. *Nature* 583, 469-  
1661 472.
- 1662 Codo, A.C., Davanzo, G.G., Monteiro, L.B., de Souza, G.F., Muraro, S.P., Virgilio-da-Silva,  
1663 J.V., Prodonoff, J.S., Carregari, V.C., de Biagi Junior, C.A.O., Crunfli, F., *et al.* (2020). Elevated  
1664 Glucose Levels Favor SARS-CoV-2 Infection and Monocyte Response through a HIF-  
1665 1alpha/Glycolysis-Dependent Axis. *Cell Metab* 32, 437-446 e435.
- 1666 Mishra, P.K., Tandon, R., and Byrareddy, S.N. (2020). Diabetes and COVID-19 risk: an miRNA  
1667 perspective. *Am J Physiol Heart Circ Physiol* 319, H604-H609.
- 1668 Nersisyan, S., Engibaryan, N., Gorbonos, A., Kirdey, K., Makhonin, A., and Tonevitsky, A.  
1669 (2020). Potential role of cellular miRNAs in coronavirus-host interplay. *PeerJ* 8, e9994.
- 1670 Overbey, E.G., Saravia-Butler, A.M., Zhang, Z., Rathi, K.S., Fogle, H., da Silveira, W.A.,  
1671 Barker, R.J., Bass, J.J., Beheshti, A., Berrios, D.C., *et al.* (2021). NASA GeneLab RNA-seq  
1672 consensus pipeline: standardized processing of short-read RNA-seq data. *iScience* 24.
- 1673 Portincasa, P., Krawczyk, M., Machill, A., Lammert, F., and Di Ciaula, A. (2020). Hepatic  
1674 consequences of COVID-19 infection. Lapping or biting? *Eur J Intern Med* 77, 18-24.
- 1675 Ren, L., Zhang, R., Rao, J., Xiao, Y., Zhang, Z., Yang, B., Cao, D., Zhong, H., Ning, P., Shang,  
1676 Y., *et al.* (2018). Transcriptionally Active Lung Microbiome and Its Association with Bacterial  
1677 Biomass and Host Inflammatory Status. *mSystems* 3.
- 1678 Ritchie, M.E., Phipson, B., Wu, D., Hu, Y., Law, C.W., Shi, W., and Smyth, G.K. (2015). limma  
1679 powers differential expression analyses for RNA-sequencing and microarray studies. *Nucleic  
1680 Acids Res* 43, e47.
- 1681 Sacar Demirci, M.D., and Adan, A. (2020). Computational analysis of microRNA-mediated  
1682 interactions in SARS-CoV-2 infection. *PeerJ* 8, e9369.
- 1683 Sardar, R., Satish, D., and Gupta, D. (2020). Identification of Novel SARS-CoV-2 Drug Targets  
1684 by Host MicroRNAs and Transcription Factors Co-regulatory Interaction Network Analysis.  
1685 *Front Genet* 11, 571274.
- 1686 Shen, Z., Xiao, Y., Kang, L., Ma, W., Shi, L., Zhang, L., Zhou, Z., Yang, J., Zhong, J., Yang, D.,  
1687 *et al.* (2020). Genomic Diversity of Severe Acute Respiratory Syndrome-Coronavirus 2 in  
1688 Patients With Coronavirus Disease 2019. *Clin Infect Dis* 71, 713-720.



- 1689 Stukalov, A., Girault, V., Grass, V., Karayel, O., Bergant, V., Urban, C., Haas, D.A., Huang, Y.,  
1690 Oubraham, L., Wang, A., *et al.* (2021). Multilevel proteomics reveals host perturbations by  
1691 SARS-CoV-2 and SARS-CoV. *bioRxiv*, 2020.2006.2017.156455.
- 1692 Teodori, L., Sestili, P., Madiati, V., Coppari, S., Fraternali, D., Rocchi, M.B.L., Ramakrishna, S.,  
1693 and Albertini, M.C. (2020). MicroRNAs Bioinformatics Analyses Identifying HDAC Pathway as  
1694 a Putative Target for Existing Anti-COVID-19 Therapeutics. *Front Pharmacol* *11*, 582003.
- 1695 Widiasta, A., Sribudiani, Y., Nugrahapraja, H., Hilmanto, D., Sekarwana, N., and Rachmadi, D.  
1696 (2020). Potential role of ACE2-related microRNAs in COVID-19-associated nephropathy.  
1697 *Noncoding RNA Res* *5*, 153-166.
- 1698 Zhang, S., Amahong, K., Sun, X., Lian, X., Liu, J., Sun, H., Lou, Y., Zhu, F., and Qiu, Y. (2021).  
1699 The miRNA: a small but powerful RNA for COVID-19. *Brief Bioinform* *22*, 1137-1149.
- 1700



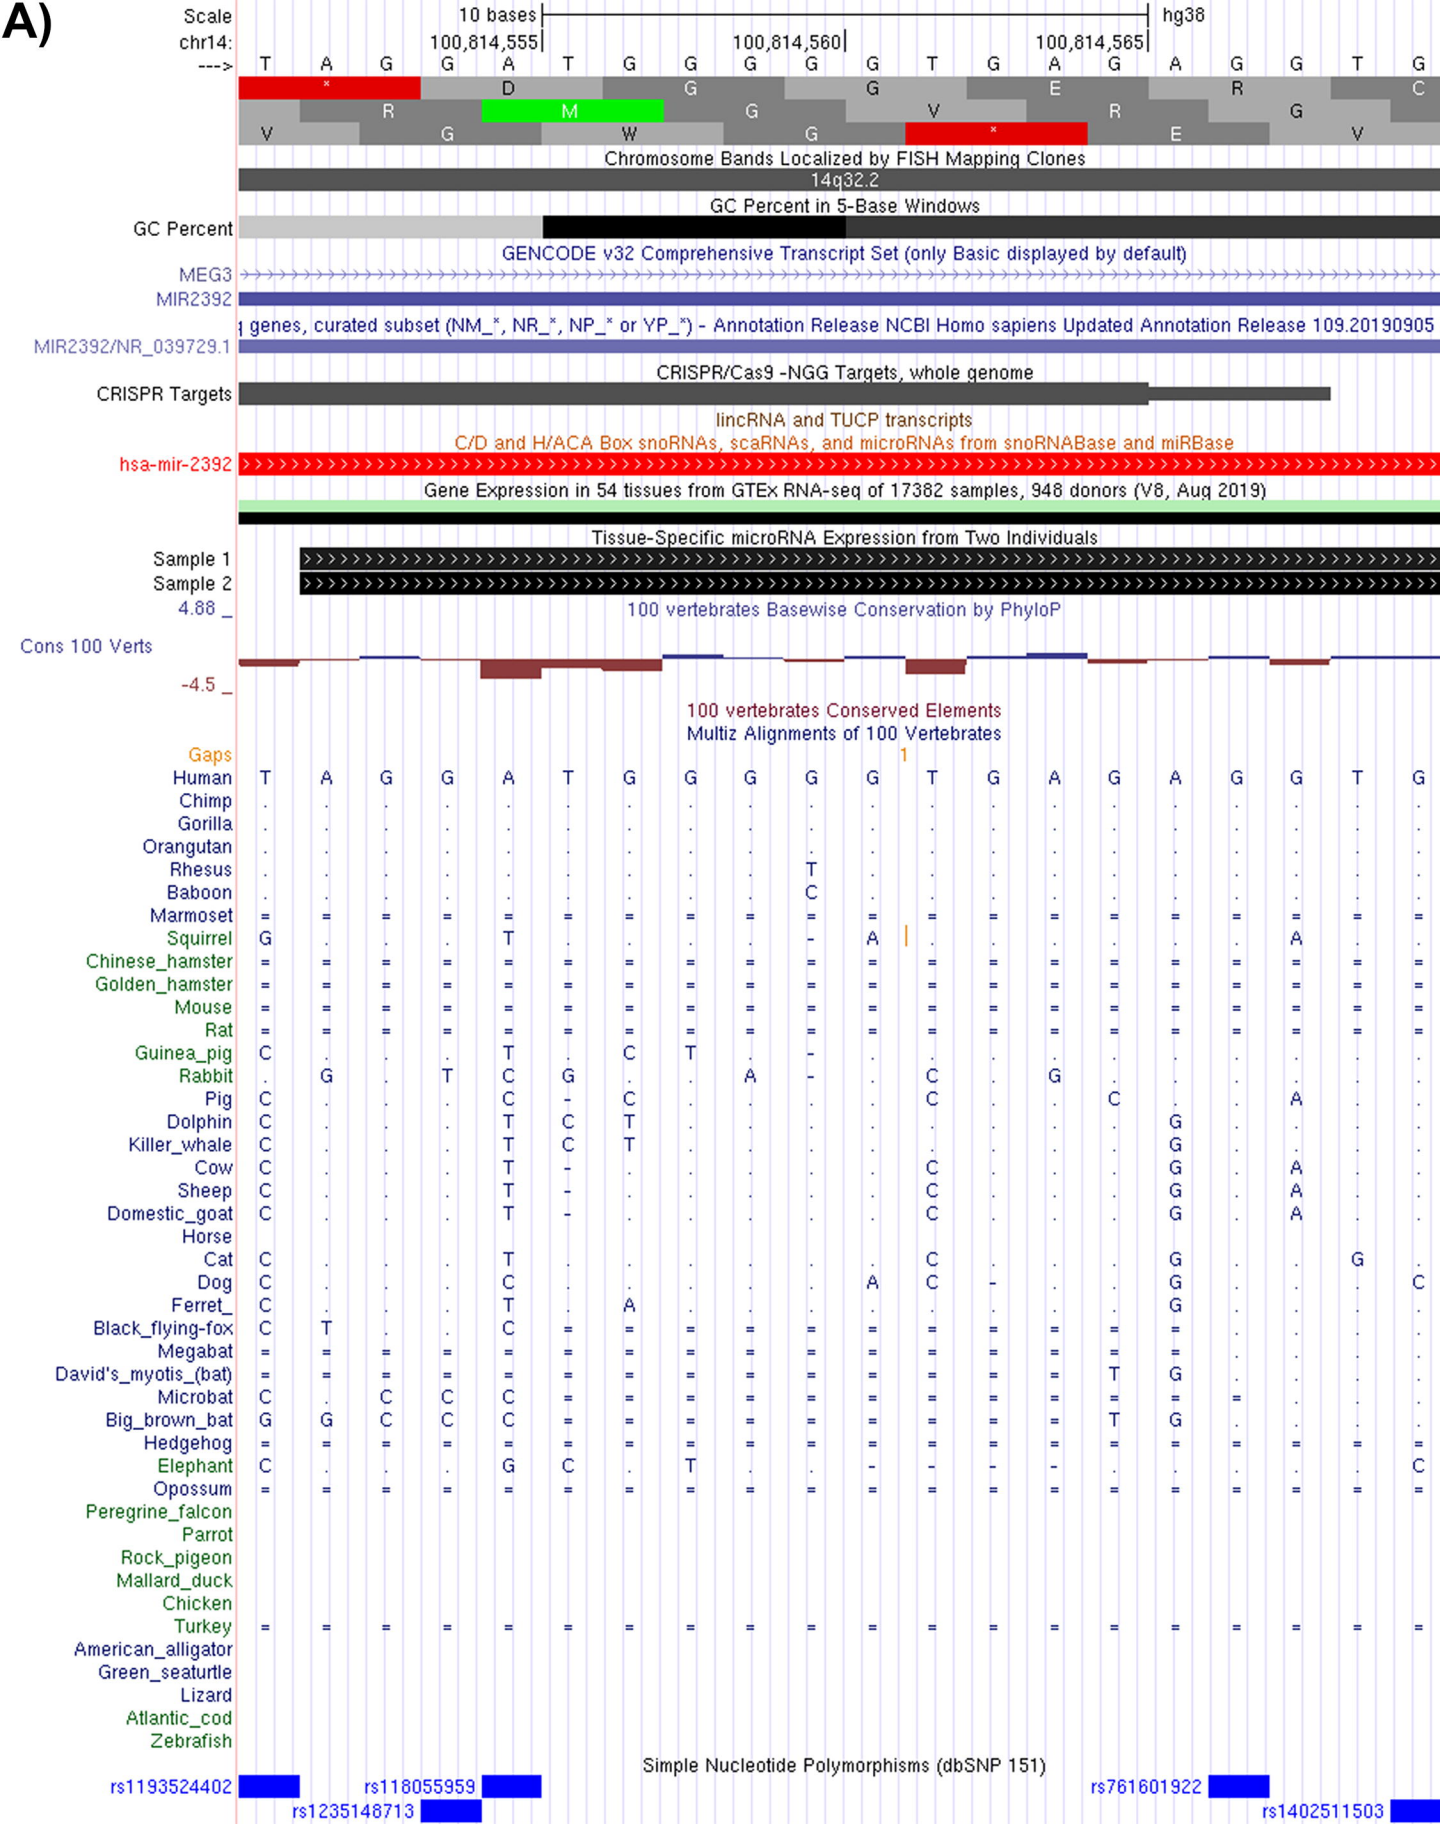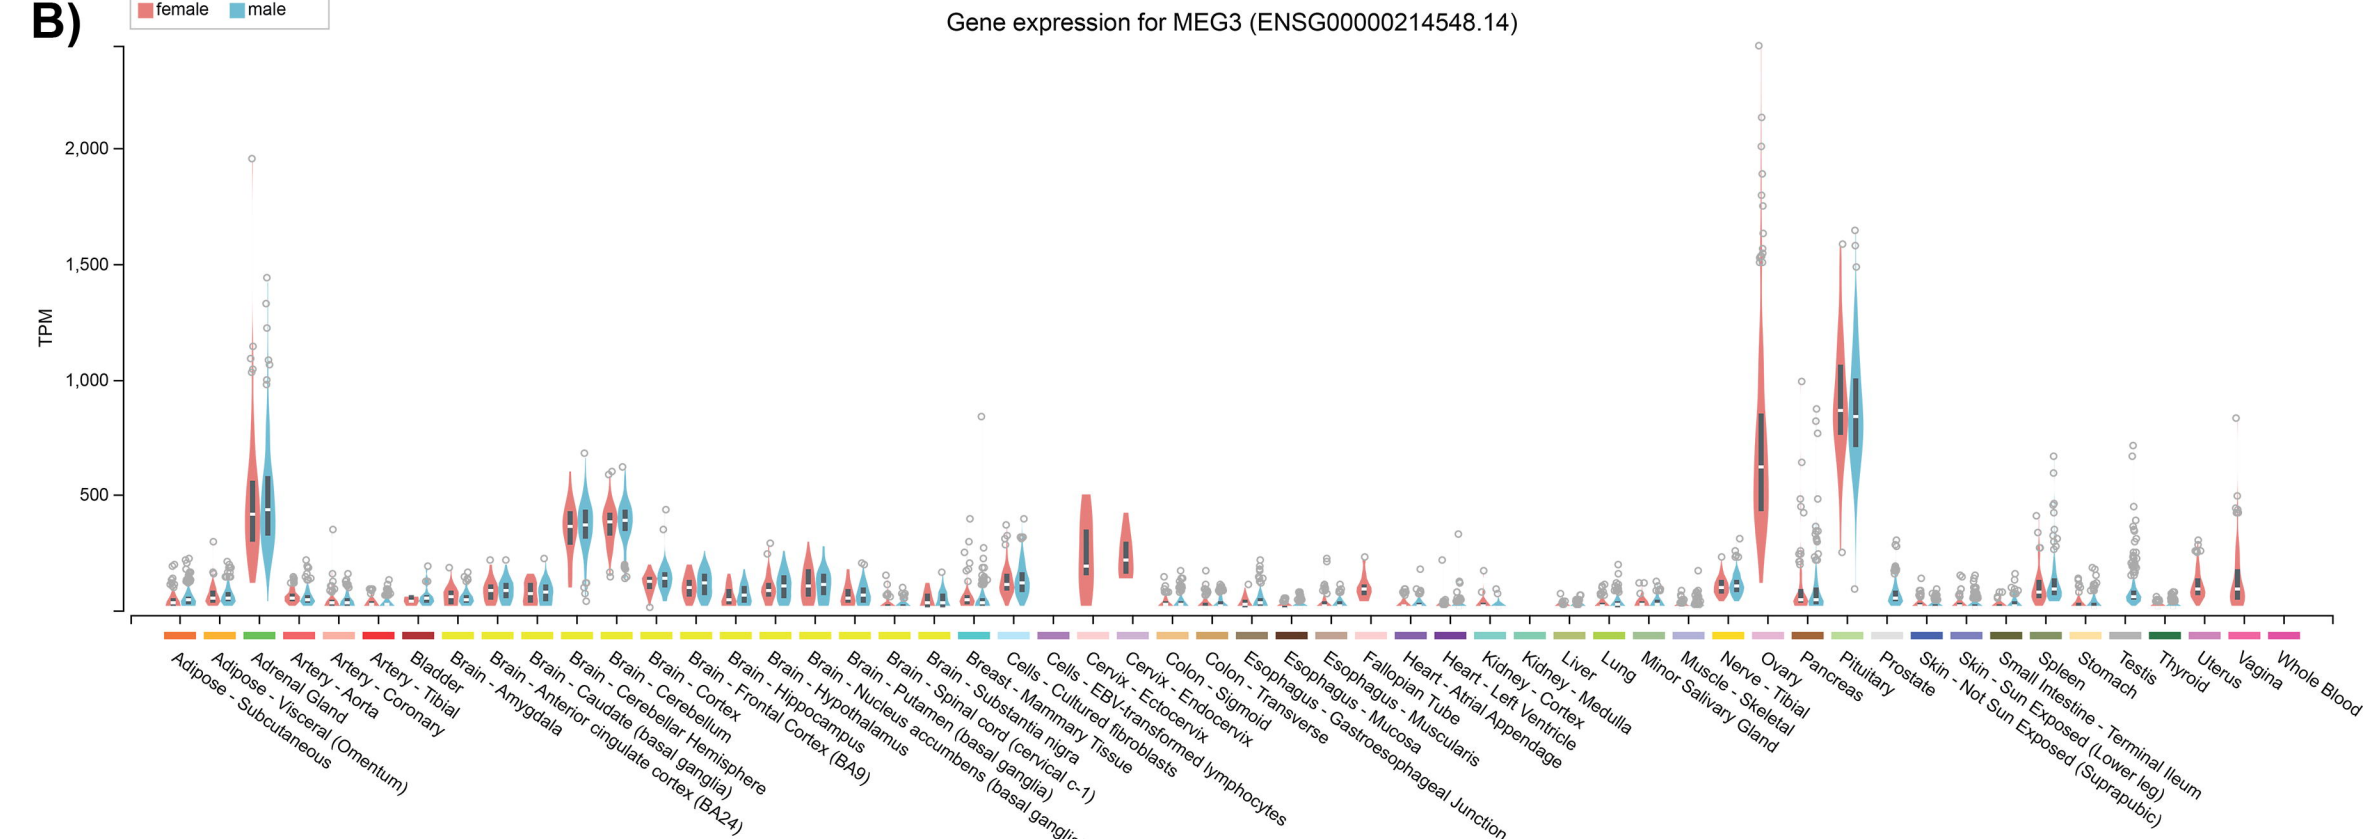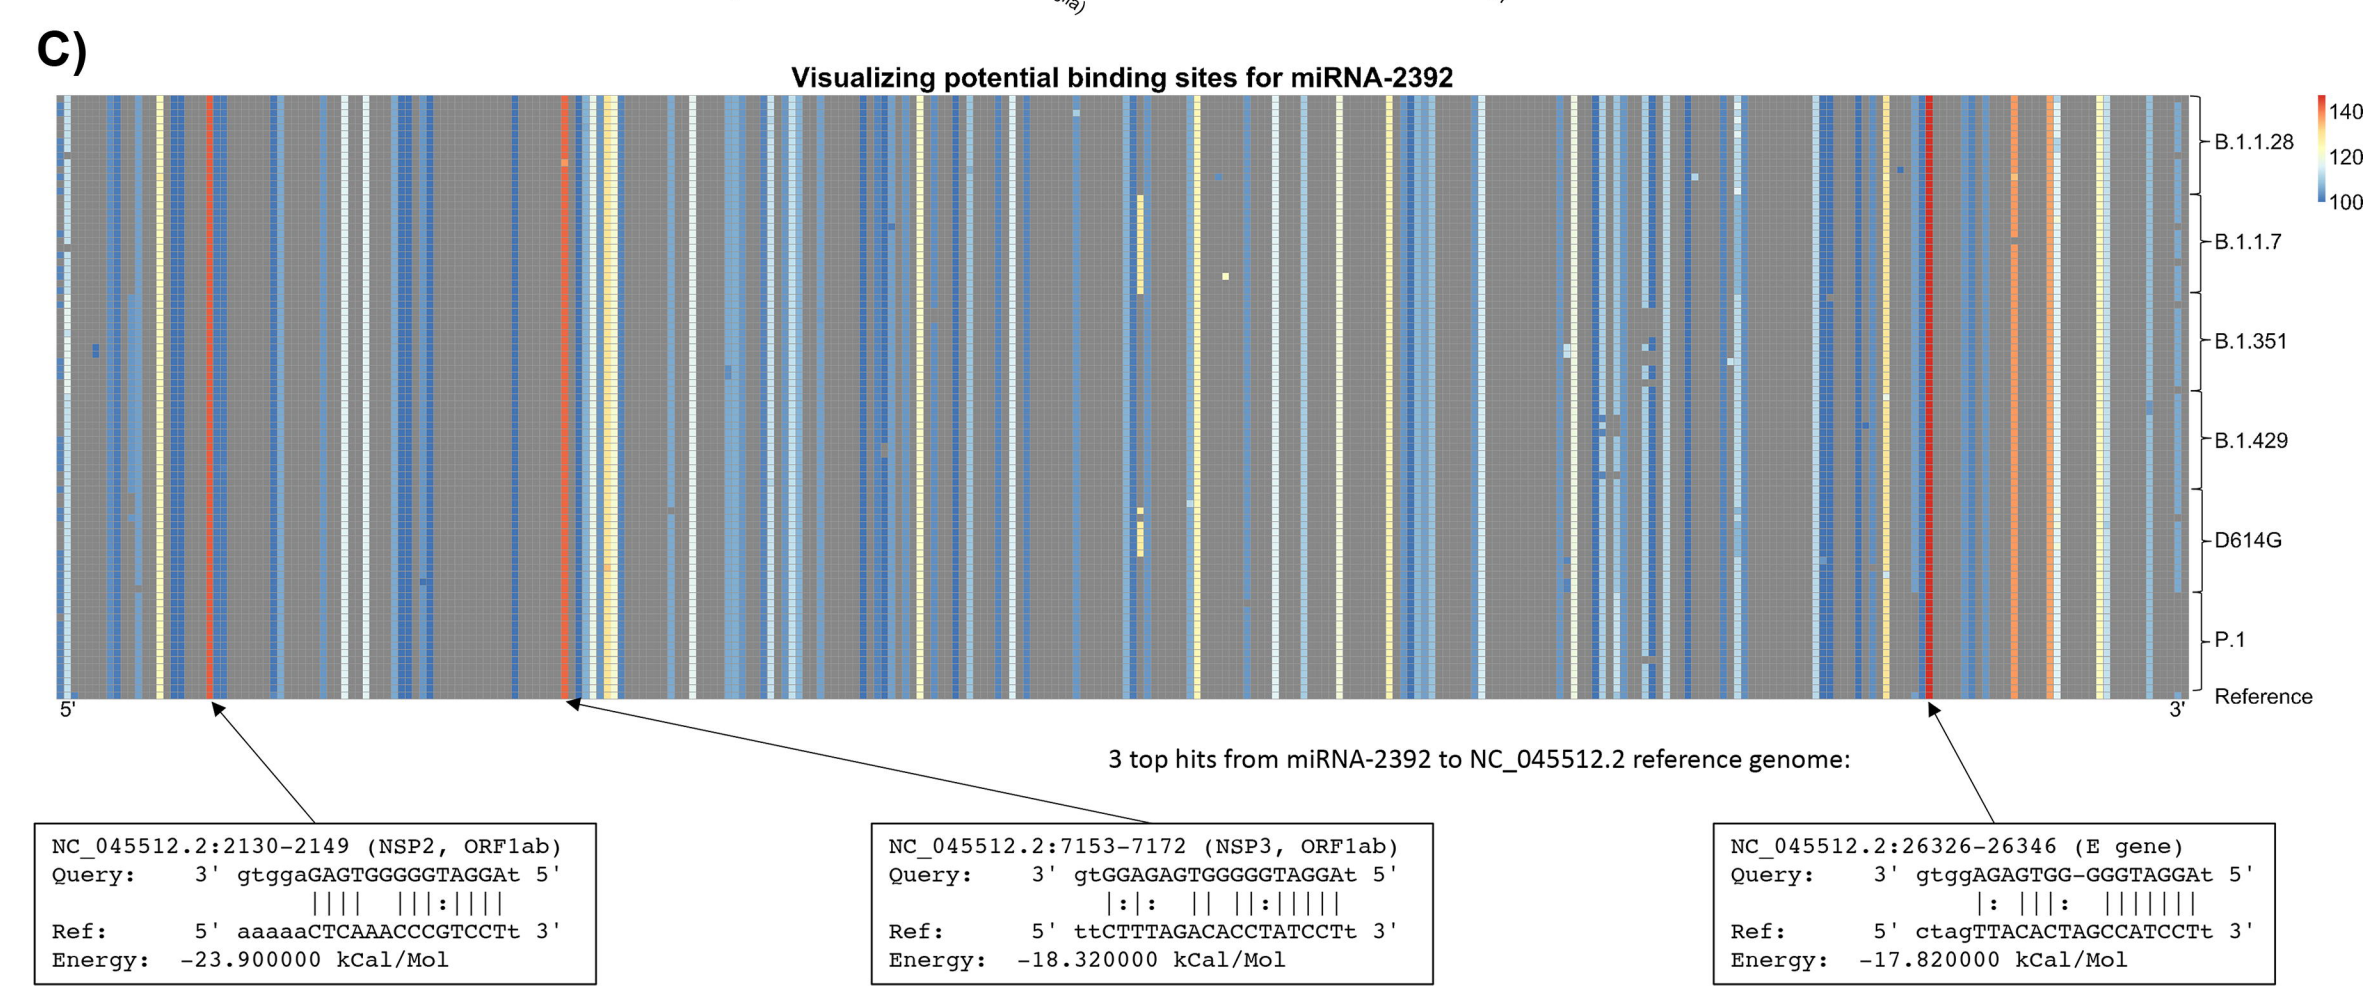

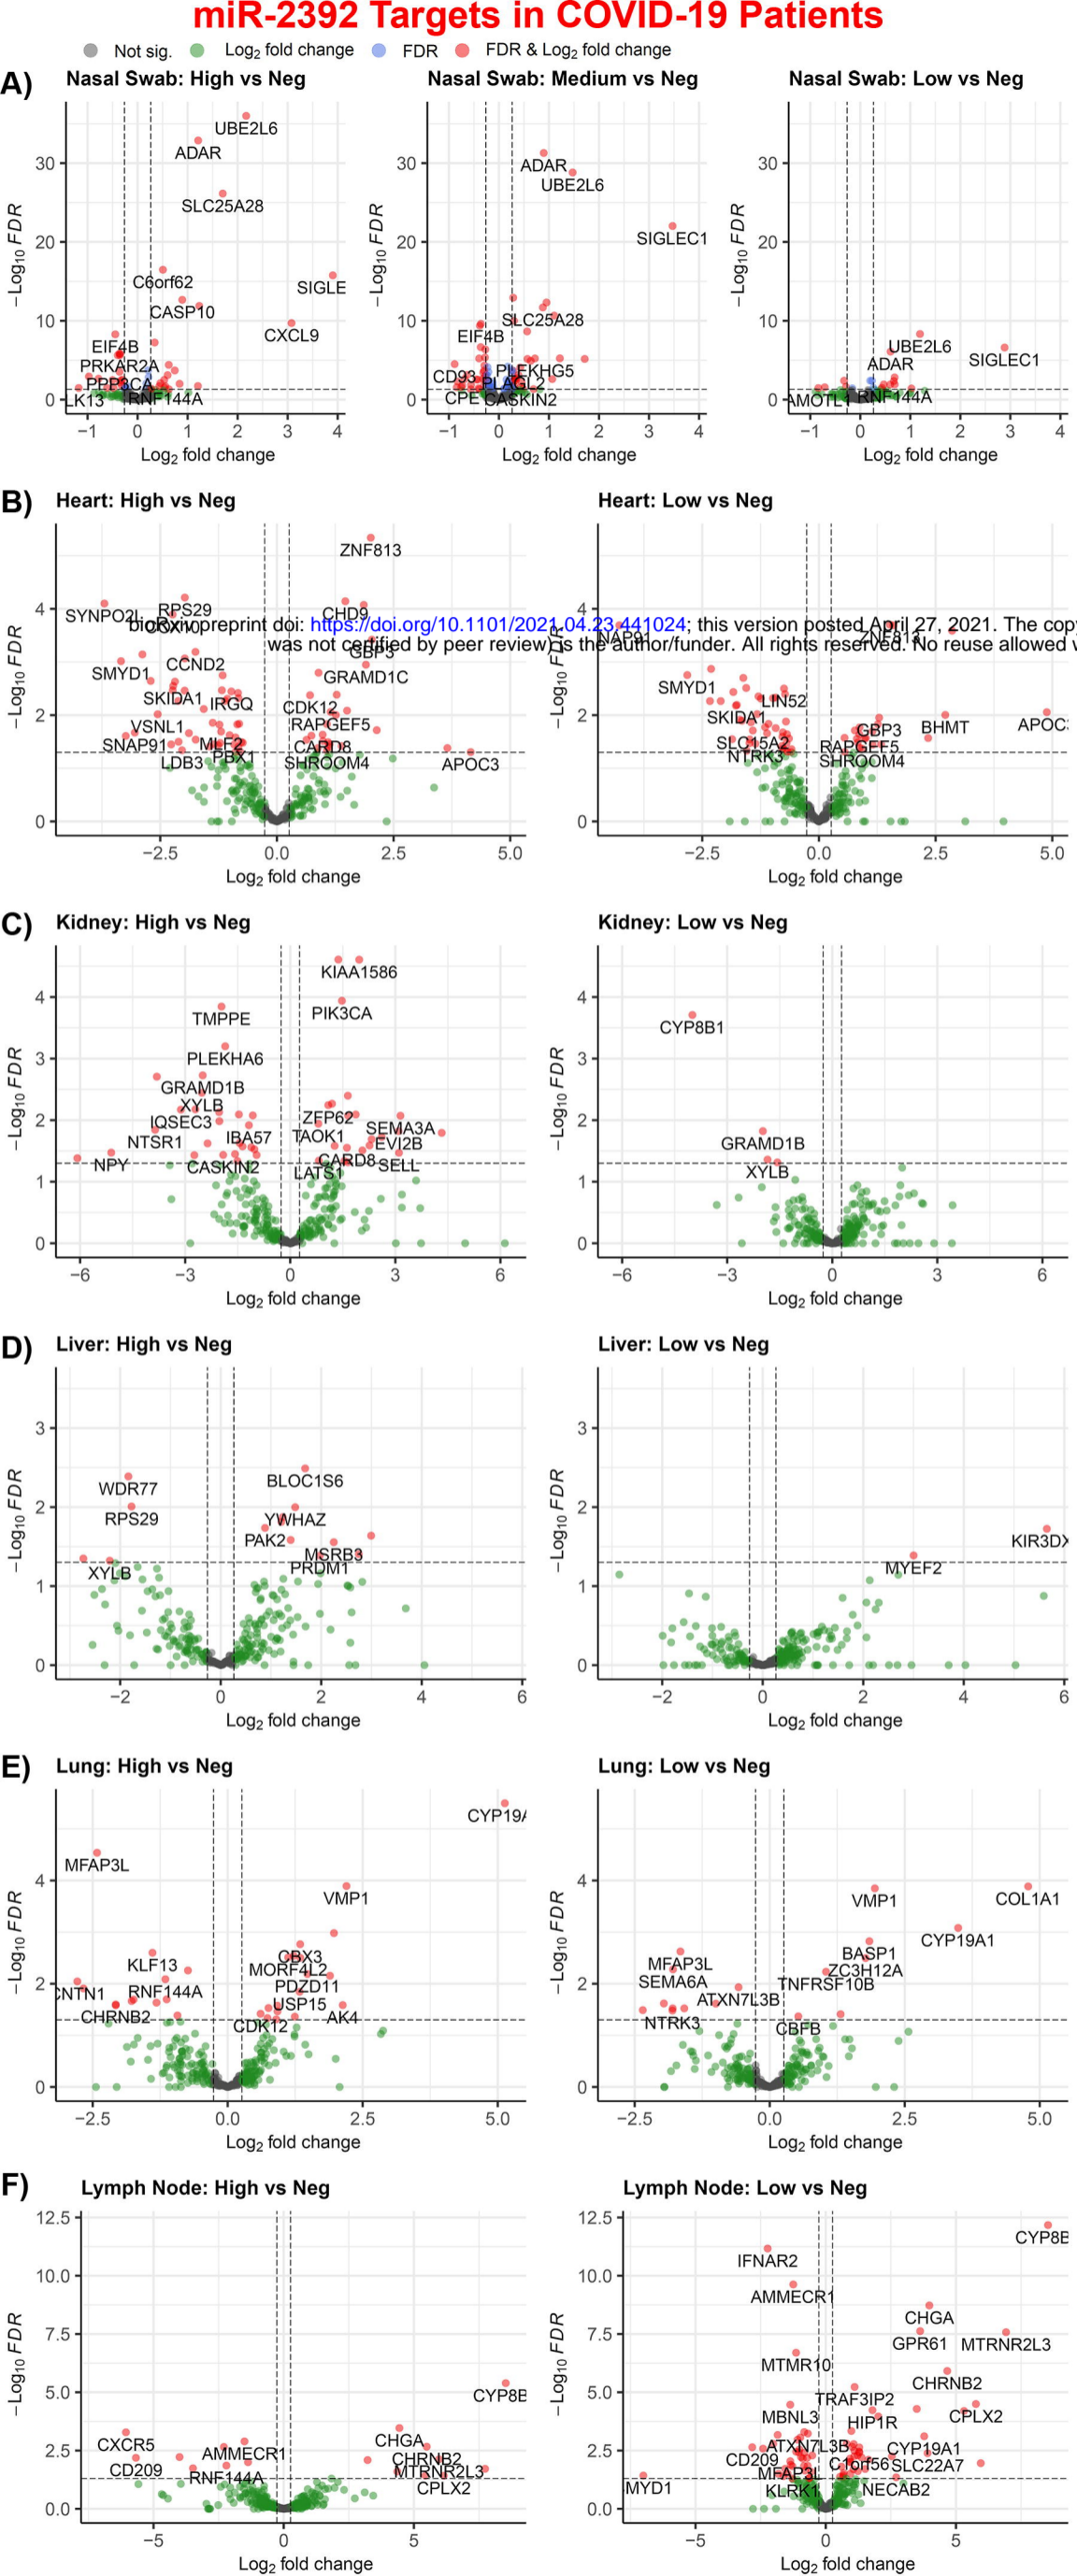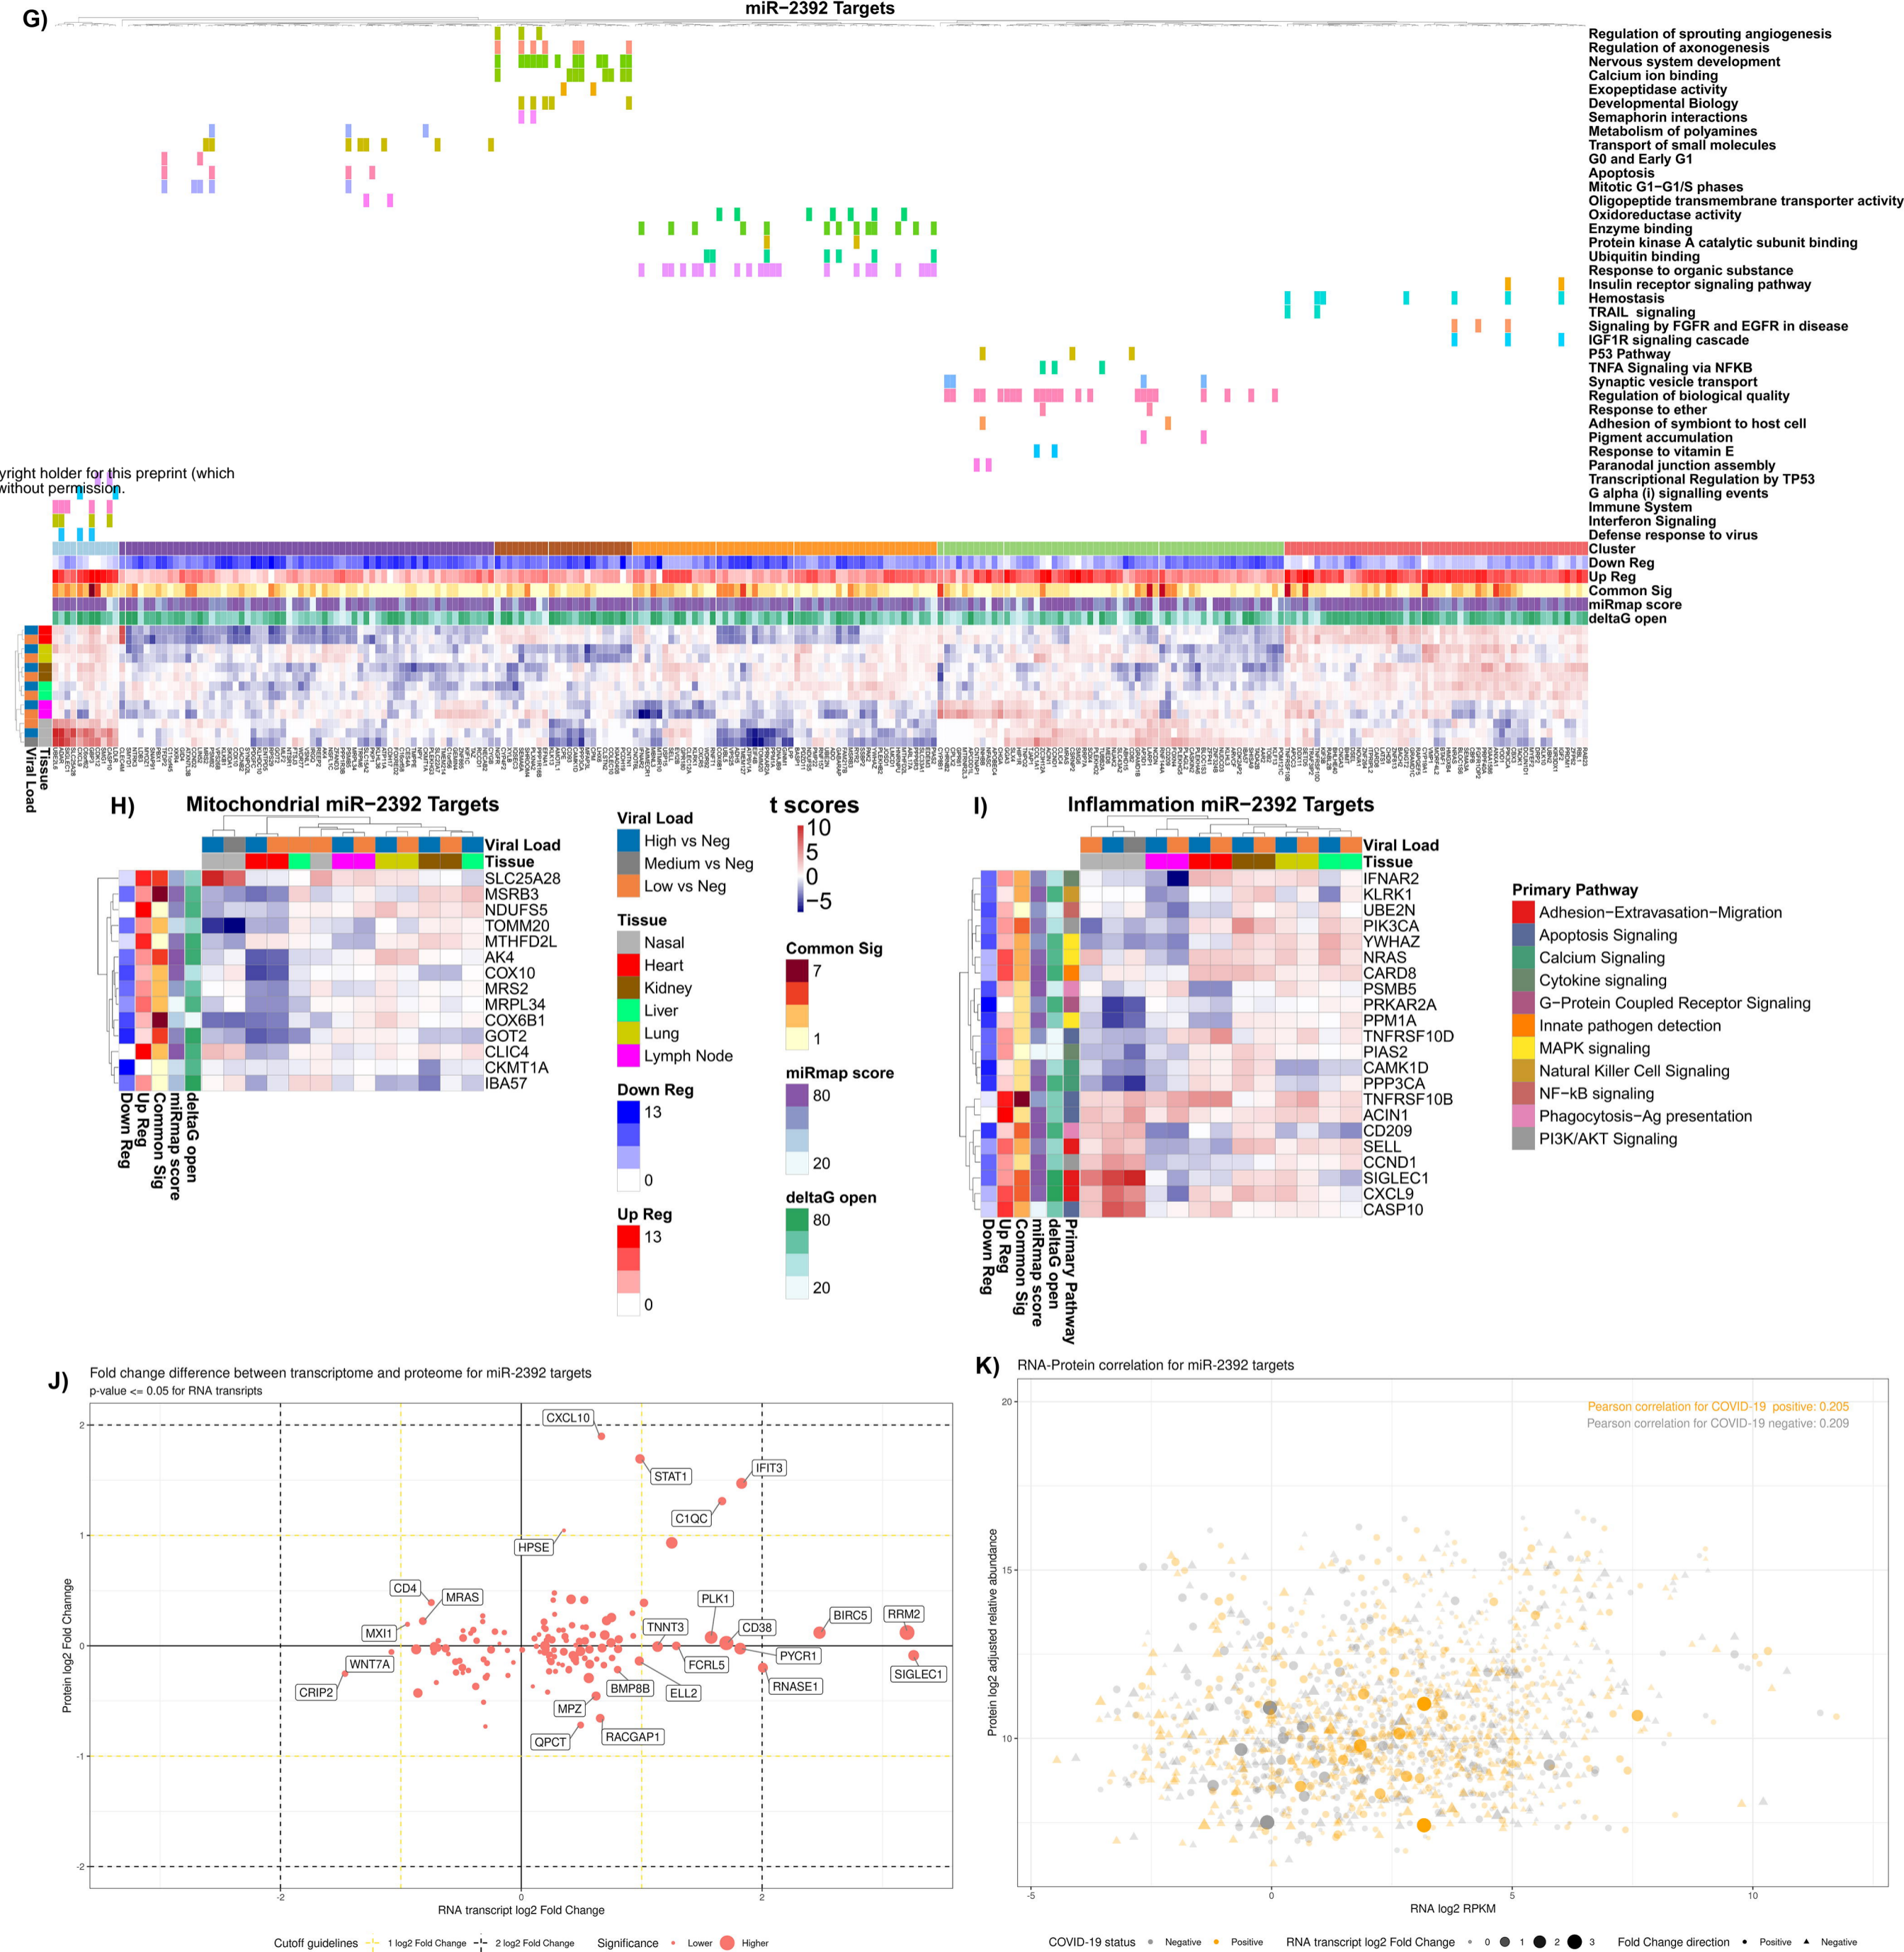

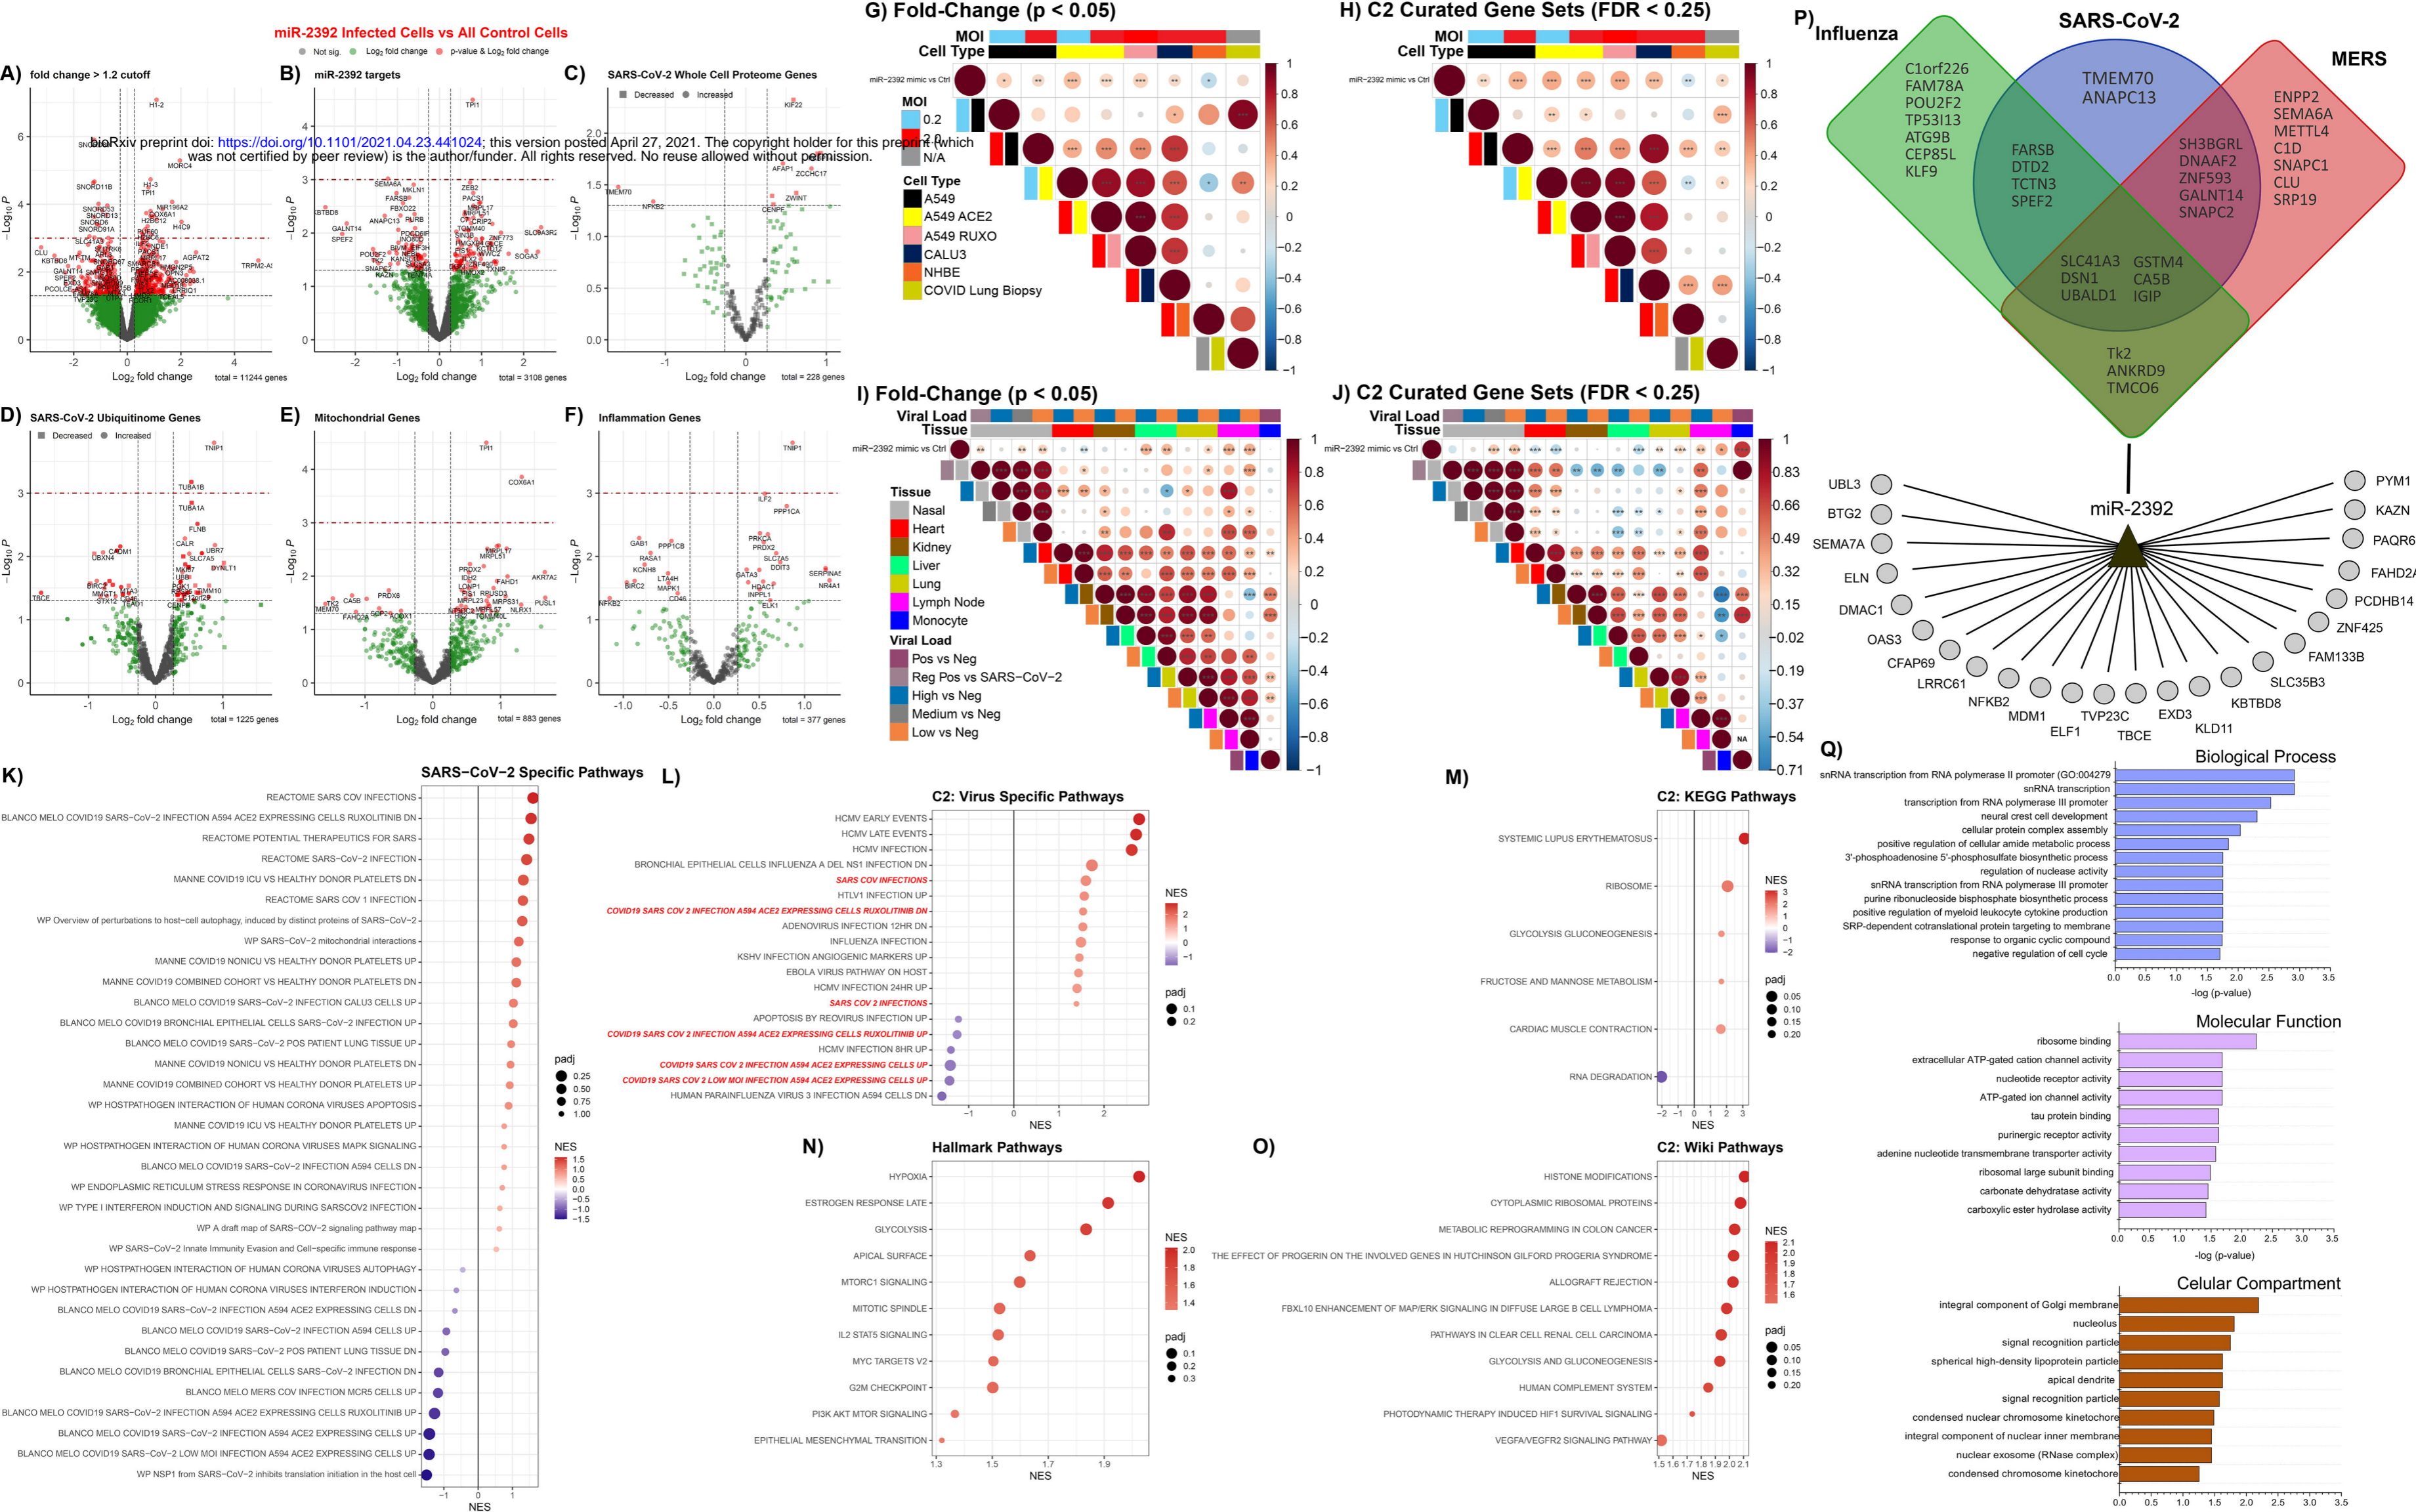

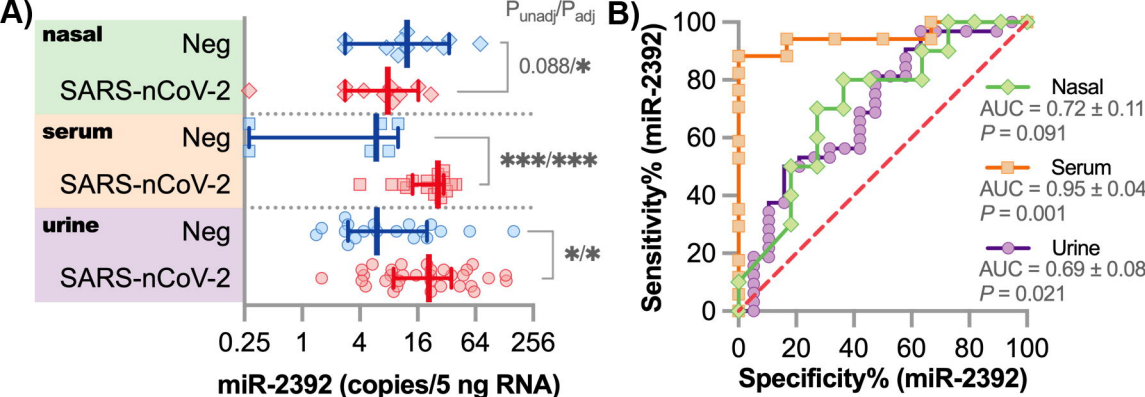

unadjusted = t-test on SARS (on log transformed values)  
adjusted = mixed model corrected for age and sex (single terms)  
\*, \*\*, \*\*\* =  $p < 0.05, 0.01, 0.001$

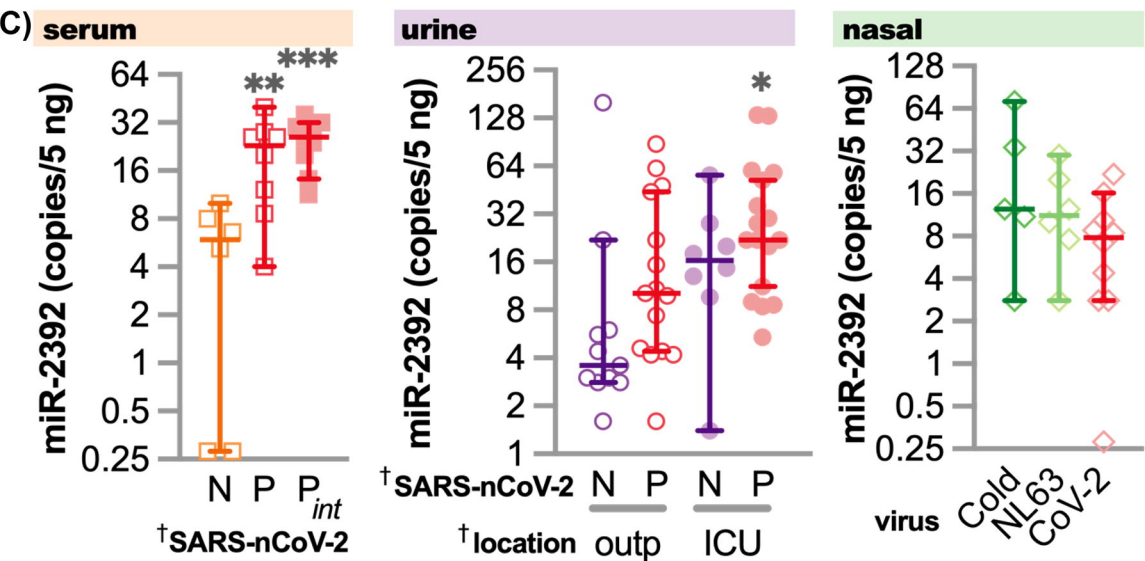

nasal and serum = ANOVA on log values

urine = 2-way ANOVA on log values

†, †† =  $p < 0.05, 0.01$  from ANOVA

\*, \*\*, \*\*\* =  $p < 0.05, 0.01, 0.001$  from Dunnet's post-test compared to Negative



# A) miR-2392 Predicted Diseases

Total # of Genes  
 ● 50  
 ● 100

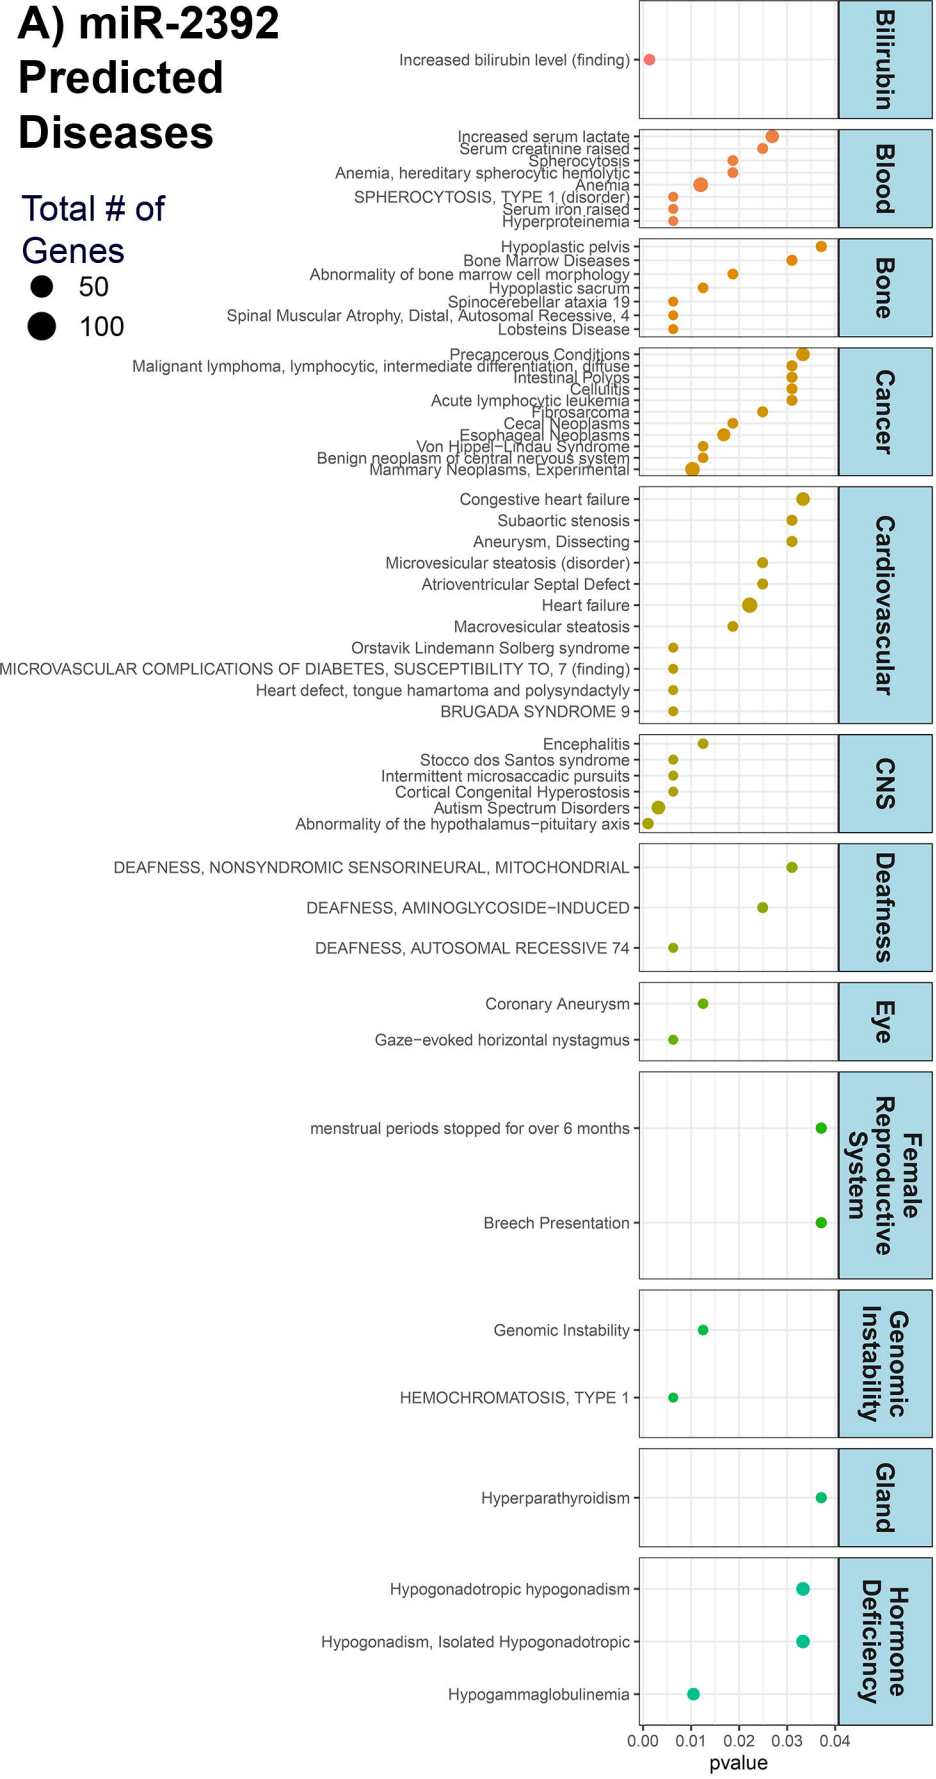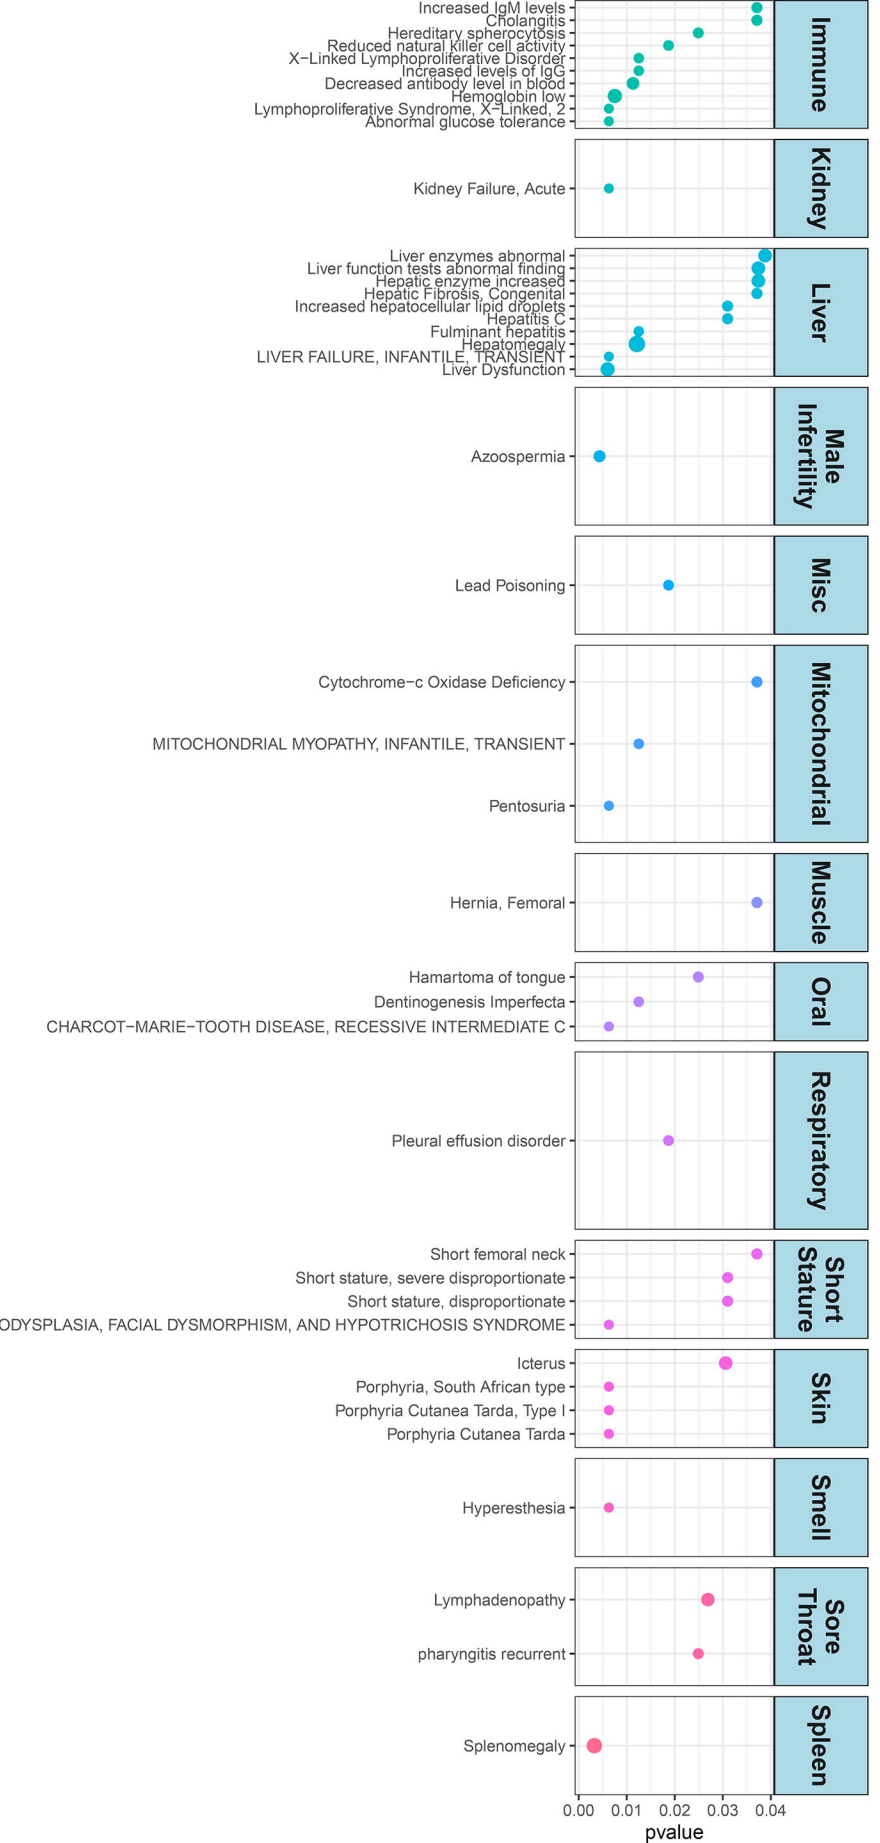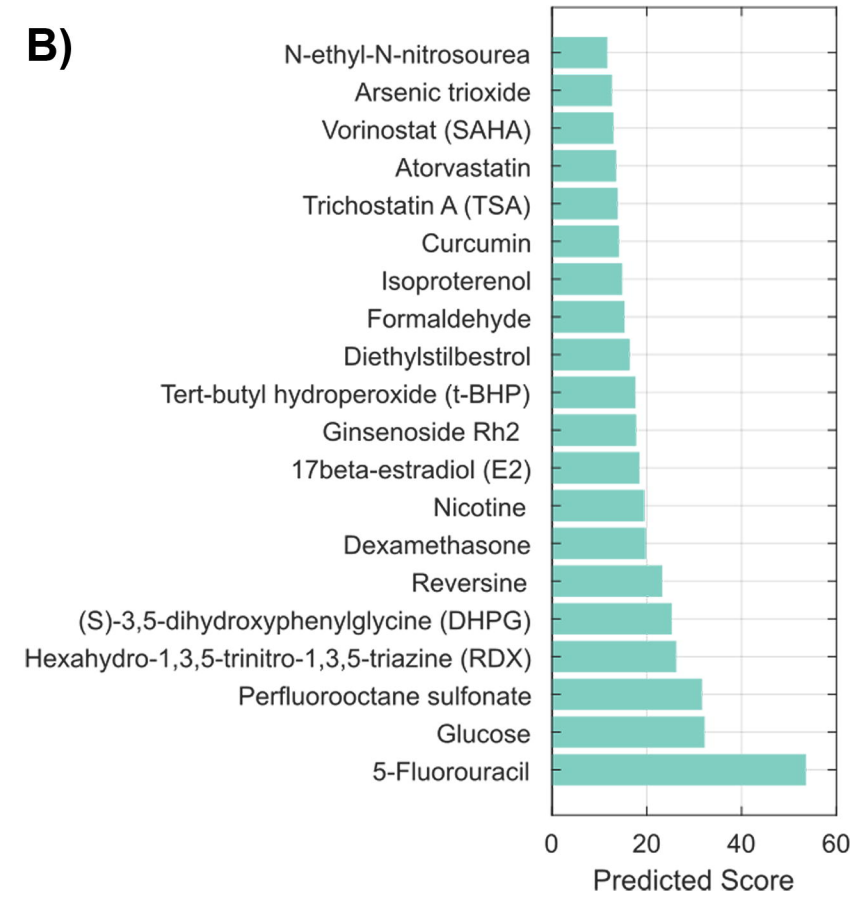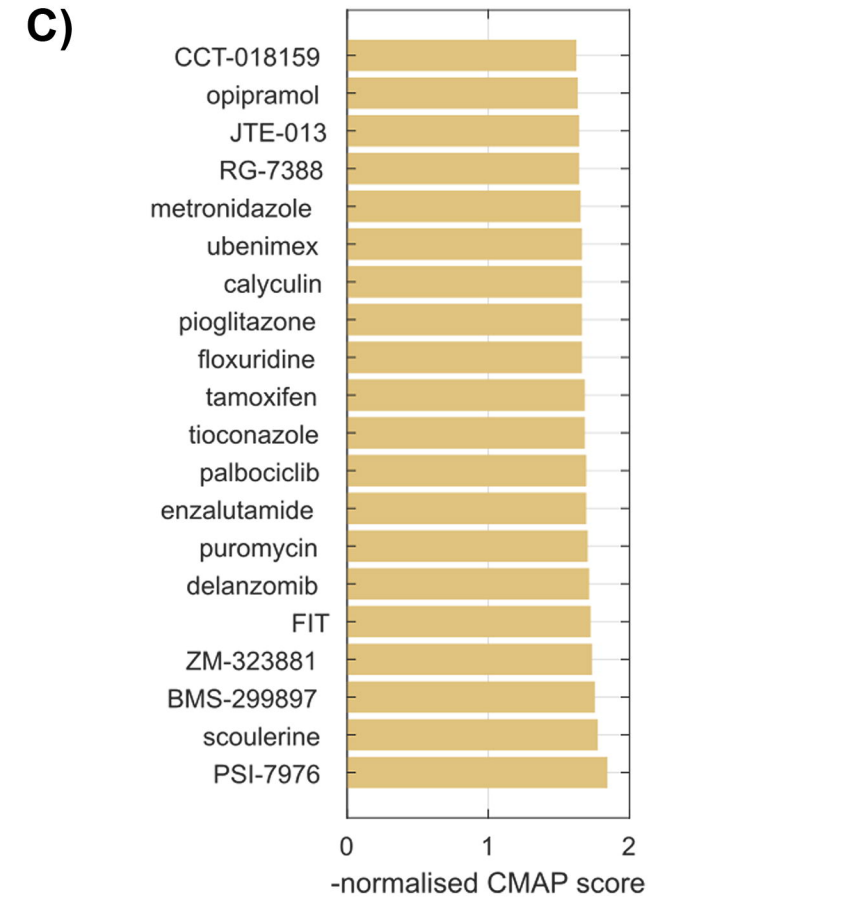

Source: https://www.biorxiv.org/content/10.1101/2021.04.23.441024v4.full.pdf
